# Supplementary material
Source: PubMed Central journal article supplement (PMC7792152)
Supplement: 12967_2020_2695_MOESM3_ESM.pdf [file 12967_2020_2695_MOESM3_ESM.pdf]

**Additional file 3:** Patient specific clinical features observed in the analyzed four COVID-19 patients.

### Patients' Information

| Patient Sample | S2     | S3     | S4   | S9   |
|----------------|--------|--------|------|------|
| Sex            | Female | Female | Male | Male |
| Age            | 43     | 85     | 42   | 55   |

### Patients' Clinical Features

| Clinical Features              | S2                                      | S3                                                                                                                                | S4                                  | S9   |
|--------------------------------|-----------------------------------------|-----------------------------------------------------------------------------------------------------------------------------------|-------------------------------------|------|
| Fever                          | Yes                                     | Yes                                                                                                                               | Yes                                 | Yes  |
| Headache                       | No                                      | No                                                                                                                                | No                                  | Yes  |
| Nausea                         | No                                      | No                                                                                                                                | No                                  | No   |
| Fatigue                        | Yes                                     | Yes                                                                                                                               | No                                  | No   |
| Coughing                       | Yes                                     | Yes                                                                                                                               | Yes                                 | Yes  |
| Shortness of Breath            | No                                      | Yes                                                                                                                               | Yes                                 | Yes  |
| Loss of smell and taste        | Yes                                     | Yes                                                                                                                               | No                                  | Yes  |
| Sore throat                    | Yes                                     | Yes                                                                                                                               | Yes                                 | Yes  |
| Body ache/pain                 | Yes                                     | No                                                                                                                                | No                                  | No   |
| Diarrhea                       | No                                      | Yes                                                                                                                               | No                                  | Yes  |
| Hospitalized                   | No                                      | Yes                                                                                                                               | No                                  | Yes  |
| Needed Oxygen support          | No                                      | Yes (for a short time period- only for 4 hours after hospitalization), oxygen saturation was normal throughout the diseased state | No                                  | Yes  |
| Comorbidities                  | No                                      | Asthma                                                                                                                            | NA                                  | NA   |
| Post-disease complications     | Itching (might not be related to COVID) | None                                                                                                                              | NA                                  | NA   |
| Current status of the patients | Healthy and living                      | Healthy and living                                                                                                                | Healthy and living                  | Dead |
| Latest COVID-19 test result    | Tested COVID-19 negative on June 13     | Tested COVID-19 negative on June 13                                                                                               | Tested COVID-19 negative on June 13 | NA   |
