# Supplementary material
Source: PubMed Central journal article supplement (PMC7792152)
Supplement: 12967_2020_2695_MOESM6_ESM.pdf [file 12967_2020_2695_MOESM6_ESM.pdf]

Table S6

## Additional file 6 Differentially expressed genes in different SARS-CoV-2 infected cell types.

| BD_Nasal    | GSE147507_Lung | GSE150316_Lung | GSE147507_NHBE | GSE148729_CALU3 |
|-------------|----------------|----------------|----------------|-----------------|
| RNA5S14     | AAK1           | IGHV4-34       | AC006058.4     | ZC3HAV1         |
| RNA5S11     | AAMP           | IGHV4-59       | AC092964.1     | DDX58           |
| RNA5S8      | AAR2           | MIR205HG       | AC099336.2     | OAS3            |
| RNA5S1      | AARS1          | IGKV2-24       | AC144530.1     | OAS2            |
| RNA5S10     | AASS           | IGLV3-27       | AL445490.1     | GBP1            |
| RNA5S13     | AATF           | IGHV3-73       | ALDH1A3        | IFIT3           |
| RNA5S15     | ABCA1          | IGHM           | ANXA3          | IFIT2           |
| RNA5S2      | ABCB10         | IGLV1-47       | AOAH           | ZNFX1           |
| RNA5S16     | ABCB11         | FAM26F         | AP001324.1     | HELZ2           |
| RNA5S3      | ABCB7          | IGLV3-21       | BCL2A1         | TRIM22          |
| RNA5S6      | ABCC10         | IGLV9-49       | BCL2L11        | RSAD2           |
| RNA5S17     | ABCC2          | IGHV5-51       | C1QTNF1        | CMPK2           |
| RNA5S7      | ABCC3          | APLN           | C1R            | HERC5           |
| RNA5S12     | ABCD4          | IGLV3-25       | C3             | MX1             |
| RNA5S5      | ABCF1          | IGKV1-12       | CAMK2D         | GBP4            |
| RNA5S4      | ABCF2          | CD3D           | CCDC14         | IFI27           |
| RNU1-28P    | ABCF3          | IGLL5          | CCL20          | TAP1            |
| RNVU1-18    | ABCG2          | LAG3           | CCNA2          | CXCL10          |
| RNU1-4      | ABHD12B        | IGHV1-18       | CD3E           | ISG20           |
| RNVU1-29    | ABHD13         | IGHV3-74       | CENPA          | PARP14          |
| RNU1-2      | ABHD14B        | IGKV1-39       | CEP55          | MX2             |
| RNU1-1      | ABHD17A        | DERL3          | CES1           | IFIT1           |
| RNU1-27P    | ABHD2          | KRT4           | CES1P1         | APOL6           |
| RNU1-3      | ABHD3          | IGHV3-48       | CFB            | WARS1           |
| RNVU1-7     | ABHD5          | HIST1H3G       | CLEC5A         | IDO1            |
| RNY1        | ABHD6          | IGHV3-49       | COL8A1         | LAMP3           |
| RNU4-2      | ABI1           | FOLR2          | CPA4           | IFI35           |
| RNA5S9      | ABL1           | IGHG4          | CSF3           | ISG15           |
| FP671120.2  | ABL2           | IGHGP          | CSTB           | TRANK1          |
| CR392039.1  | ABLIM1         | HIST1H2BL      | CTSH           | OAS1            |
| VTRNA1-1    | ABLIM3         | IGHV3-53       | CXCL16         | TNFSF10         |
| RNA5SP370   | ABR            | CD27           | CXCL5          | IFITM1          |
| FP236383.6  | ABRACL         | HIST1H3C       | CXCL9          | PMAIP1          |
| RNA5SP202   | ABT1           | IGHV3-15       | DUSP4          | IRF1            |
| RNVU1-28    | ABTB1          | HIST1H2BF      | EDN1           | IRF7            |
| CDR1        | AC000089.1     | HIST1H2AH      | EEF1A1P13      | SAMD9           |
| SNORA73B    | AC002075.2     | LTB            | EFNA1          | SAMHD1          |
| RNU1-11P    | AC004057.1     | HIST1H2BO      | EIF4BP3        | JUN             |
| RNY4        | AC004151.1     | KIF2C          | EIF4BP6        | TXNIP           |
| FP236383.1  | AC004158.1     | HIST1H3F       | FAT2           | PARP10          |
| RNA5SP389   | AC004453.1     | HIST1H2BH      | FBXW7          | GSDMB           |
| RNU4-1      | AC004552.1     | RAMP3          | FCGBP          | IFIT5           |
| FP236383.9  | AC004846.1     | APOL4          | GAS6-AS1       | HCP5            |
| H4C5        | AC004846.2     | HIST1H2BI      | GCLC           | PPP1R15A        |
| MIR3648-1   | AC004847.1     | HIST1H2AL      | HELZ2          | DHX58           |
| SMR3B       | AC004877.2     | PSMB10         | HK3            | CCL5            |
| H4C11       | AC005005.4     | SNORA13        | HSH2D          | UBE2L6          |
| RNA5-8SN2   | AC005083.1     | CCNB1          | HSPB1P1        | RNF213          |
| RNA5-8SN3   | AC005229.4     | EXOC3L1        | ICAM1          | HLA-B           |
| FP671120.4  | AC005261.2     | RNU1-28P       | IFI27          | PLEKHA4         |
| RNA5-8SN1   | AC005332.6     | ITM2C          | IFI44L         | HLA-F           |
| FP236383.3  | AC005336.1     | LTF            | IFI6           | STAT2           |
| MIR3648-2   | AC005912.1     | C12orf75       | IFITM1         | CX3CL1          |
| FP671120.1  | AC006001.4     | HIST1H1B       | IFITM10        | XAF1            |
| FP236383.10 | AC006252.1     | HIST1H3I       | IKBKE          | TAP2            |
| RN7SL5P     | AC006262.1     | HIST1H3B       | IKZF1          | DDX60           |

Table S6

|              |             |           |             |            |
|--------------|-------------|-----------|-------------|------------|
| RNA28S5      | AC006386.2  | MYBL2     | IL10        | USP18      |
| PRB4         | AC006435.2  | CLEC3B    | IL6         | LGALS9     |
| PRB3         | AC006511.4  | PLVAP     | IRF7        | IFI16      |
| RNA5SP298    | AC006548.28 | KIFC1     | ITGA5       | NFKBIA     |
| FP236383.5   | AC007336.1  | HIST1H2AG | IVL         | HLA-E      |
| FP236383.4   | AC007384.1  | HIST1H2BN | KB-1507C5.4 | PTGER4     |
| FP236383.12  | AC007686.3  | VAMP5     | KRT6B       | SAMD9L     |
| FP671120.7   | AC007743.1  | MMP28     | LINC00504   | DDX60L     |
| RN7SL4P      | AC007881.1  | DLGAP5    | LTB         | IFI44      |
| RNA5SP226    | AC007906.2  | ICAM2     | MAFF        | AL669918.1 |
| RN7SL752P    | AC008147.2  | RARRES3   | MAP3K8      | HERC6      |
| RNY3         | AC008537.3  | HIST2H2AB | MAP7D2      | KLF4       |
| AC079601.1   | AC008555.2  | IFI27L2   | MCM4        | TIPARP     |
| RNA5SP145    | AC008676.1  | HIST1H3D  | MIR155HG    | DTX3L      |
| RNA5SP149    | AC008687.2  | LIMD2     | MIR3142HG   | CXCL8      |
| RNA5SP429    | AC008760.2  | BUB1      | MME         | RTP4       |
| AL135938.1   | AC008764.2  | STYXL1    | MMP9        | TENT5A     |
| RNA5SP74     | AC008969.1  | HIST1H2AE | MX1         | NFKBIZ     |
| CRNN         | AC009005.1  | CKS2      | MX2         | MAP3K8     |
| RNY3P1       | AC009054.2  | BANK1     | MYLK        | PARP12     |
| FAM27E2      | AC009126.1  | MRPL2     | NANOS1      | OASL       |
| FP236383.7   | AC009245.1  | NCF1      | NCCRP1      | STAT1      |
| RN7SL396P    | AC009275.1  | RAMP2     | NEDD9       | PLAAT4     |
| FP671120.5   | AC009283.1  | SP140     | NHBE_DE     | IFNL1      |
| H1-4         | AC009303.4  | HIST1H2BG | NID1        | NLRC5      |
| AL162581.1   | AC009318.1  | NDUFA3    | NT5DC3      | SP110      |
| CRCT1        | AC009961.1  | CIITA     | OAS1        | CEACAM1    |
| RNA5SP335    | AC010173.1  | THYN1     | OR7E47P     | CCL20      |
| RNA5-8SP6    | AC010226.1  | ITGB4     | OSBP2       | BATF2      |
| AC024051.11  | AC010326.4  | GIMAP7    | P2RY6       | PARP9      |
| AC024051.5   | AC010970.1  | HDAC9     | PARP12      | UBA7       |
| AC024051.12  | AC011472.2  | CORO1A    | PCDH17      | PSMB8      |
| AC024051.1   | AC011498.7  | CLEC14A   | PDCD4       | TEP1       |
| FP236383.8   | AC011933.1  | CRIP1     | PDGFB       | ETS2       |
| RNU2-1       | AC012085.1  | PSD4      | PDZK1IP1    | CFB        |
| AC024051.2   | AC012368.1  | FCGRT     | PGLYRP4     | VIM        |
| SNORD17      | AC015912.3  | TXNDC5    | PLA1A       | NMI        |
| AC024051.7   | AC015922.3  | HN1       | PLAT        | TNFAIP2    |
| AC024051.10  | AC016142.1  | SNRPD2    | PLSCR1      | GBP3       |
| AC024051.3   | AC016745.2  | HIST1H2BC | POU2F2      | HLA-C      |
| AC024051.8   | AC016747.1  | CXorf36   | PPARGC1A    | PMEPA1     |
| AC024051.6   | AC016957.2  | PLCG2     | PRELID1     | APOL1      |
| RNA5SP161    | AC018638.1  | HIST1H2BD | PRELID2     | NCOA7      |
| AC024051.4   | AC018638.2  | LMAN2     | PRF1        | TRIM5      |
| AL161626.1   | AC018868.1  | PSME1     | RAB15       | IFIH1      |
| LINC01783    | AC019322.6  | NCAPD2    | RAB7B       | PML        |
| CXCL11       | AC020612.3  | CLU       | RFTN1       | HLA-A      |
| H4C8         | AC020765.2  | RFX5      | RND1        | IFITM2     |
| FABP6-AS1    | AC020916.1  | ATPIF1    | RPL10AP6    | AHNAK      |
| RN7SKP71     | AC021106.1  | PRDX5     | RPL21P16    | SNORD3A    |
| RN7SKP203    | AC022149.1  | PPP1CA    | RPL37P2     | JAK2       |
| UBQLNL       | AC022211.4  | PSMD4     | RPL7AP50    | LAP3       |
| CTA-384D8.31 | AC022274.1  | SPAG9     | RPL9        | DUSP1      |
| AC092299.7   | AC022400.9  | SERTAD2   | RPS2P55     | XRN1       |
| BPIFB2       | AC022613.1  | ROCK2     | S100P       | SLC15A3    |
| SIGLEC16     | AC022916.2  | CREB3L2   | SAA1        | BBC3       |
| TRPV1        | AC022929.2  | FAM168B   | SAA2        | B2M        |
| H2BC8        | AC022966.1  | NABP1     | SEC14L4     | LY6E       |
| FAM27E3      | AC023157.1  | PIK3R1    | SERPINB1    | KDM6A      |
| RNA5SP481    | AC023157.3  | AFF4      | SMTN        | BIRC3      |

Table S6

|            |            |               |         |            |
|------------|------------|---------------|---------|------------|
| H4C2       | AC023590.1 | DDX21         | SOD2    | FNDC3A     |
| LINC02176  | AC025518.1 | SNX13         | SPRR2B  | NEAT1      |
| MIR663AHG  | AC025580.2 | PDZD8         | SPRR2D  | SCD        |
| SCARNA7    | AC025884.1 | BCL2L2        | SPRR2E  | HLA-H      |
| C1QB       | AC027801.1 | SLIT3         | ST3GAL5 | IL1A       |
| GDF5       | AC034236.1 | CHSY1         | STAT5A  | OPTN       |
| SIGLEC1    | AC040160.1 | LRRTM2        | STRBP   | RN7SL3     |
| CA6        | AC040162.1 | FOXO3         | SUSD6   | PPM1K      |
| SCARNA6    | AC040970.1 | YBX3          | TCF4    | NUB1       |
| MZB1       | AC055733.1 | LPP           | TCIM    | CD74       |
| CD8A       | AC060766.4 | CLIC4         | TFCP2L1 | NFKB2      |
| HTN3       | AC060766.7 | FNIP1         | TGM1    | MLEC       |
| AC087276.3 | AC060814.2 | TNFAIP3       | TNF     | TRIM21     |
| MOCS1      | AC064799.1 | ELK4          | TNFAIP2 | CXCL11     |
| AC084082.1 | AC067930.4 | NUPL1         | TNFAIP3 | KLF6       |
| RN7SKP80   | AC067945.3 | SPRY4         | TNFSF14 | SAT1       |
| CARNS1     | AC068039.4 | TTC19         | TREML4  | ABHD2      |
| MT-RNR2    | AC068448.2 | RLIM          | TRIM47  | ETV7       |
| SIGLEC11   | AC068888.1 | AGFG1         | VGLL4   | CFTR       |
| AP001462.1 | AC068987.2 | PHLDA1        | VNN1    | EGR1       |
| THSD4-AS1  | AC069547.1 | SLC6A6        | VNN3    | MXD1       |
| AL354919.1 | AC073072.1 | FOXO1         | XAF1    | AFAP1      |
| STATH      | AC073343.1 | IMPAD1        | XDH     | SLC1A3     |
| AL137779.1 | AC073349.2 | OSBPL8        | YTHDC2  | SNORA73B   |
| BSN        | AC073548.1 | MAPK6         | ZC3H12A | APOL2      |
| CYP2D8P    | AC073861.1 | ZFAND5        | ZCCHC10 | EPSTI1     |
| H2AC8      | AC073869.1 | PPP1R3B       | ZNF488  | ATF3       |
| SKAP2      | AC078819.1 | CTB-89H12.4   |         | IL6        |
| SNX29P1    | AC079228.1 | PAG1          |         | ZFP36      |
| G2E3-AS1   | AC079250.1 | KLF6          |         | TRIM38     |
| AC016168.4 | AC079922.1 | NEDD9         |         | HLA-DRA    |
| IKZF3      | AC079949.1 | TXNRD1        |         | CYLD       |
| PPP1R1A    | AC080023.1 | ENPP4         |         | RIPOR2     |
| H2BC4      | AC083843.3 | RP11-463O12.5 |         | BTN3A1     |
| CHAC1      | AC083899.1 | KITLG         |         | OGFR       |
| AL596325.2 | AC084871.1 | FLJ42393      |         | ERAP2      |
| MAP1LC3C   | AC084880.1 | UPP1          |         | PLAUR      |
| HOPX       | AC087473.1 | CSGALNACT2    |         | AL645922.1 |
| IFIT2      | AC087623.2 | SLC16A7       |         | TMEM140    |
| RN7SKP255  | AC090114.2 | NRCAM         |         | SNORA73A   |
| CXCL10     | AC090543.3 | GK            |         | DNAJB4     |
| KRT78      | AC090559.1 | EMP1          |         | NFE2L3     |
| AC068987.2 | AC090587.2 | BHLHE40       |         | NT5C3A     |
| RN7SL391P  | AC091230.1 | RP11-107E5.3  |         | IKZF3      |
| ARHGAP40   | AC091304.1 | AKAP12        |         | ARRDC3     |
| ADRA2A     | AC092118.1 | NUDT16        |         | TDRD7      |
| CNFN       | AC092597.1 | GBE1          |         | TRIM69     |
| TERB1      | AC092670.1 | ADAMTS9       |         | SERPINB2   |
| TRIM34     | AC092683.1 | TMED7         |         | TPM1       |
| SLC9C2     | AC092718.4 | VGLL3         |         | RASGRP3    |
| CACNG8     | AC092865.1 | SLC6A8        |         | TAPBPL     |
| CLVS1      | AC092919.3 | PTP4A1        |         | DICER1     |
| H1-2       | AC092964.1 | ATP13A3       |         | TOP2A      |
| SPRR2D     | AC093010.3 | NAMPT         |         | PRKD2      |
| SLC23A3    | AC093323.1 | ADAMTS1       |         | SHFL       |
| AC005921.4 | AC093690.1 | SLC2A3        |         | BST2       |
| LMX1B      | AC093752.1 | RHOQ          |         | PNPT1      |
| PGBD5      | AC097263.1 | PDLIM3        |         | PIK3AP1    |
| C8orf34    | AC097523.1 | ERRFI1        |         | PTGS2      |
| SSPO       | AC098583.1 | BEST1         |         | TYMP       |

Table S6

|            |             |               |           |
|------------|-------------|---------------|-----------|
| FLG2       | AC098851.1  | IER3          | TRIM26    |
| AP000708.1 | AC099336.2  | SLC7A2        | NEURL3    |
| AC006435.4 | AC099343.4  | ADAMTS15      | HSH2D     |
| H2BC5      | AC099524.1  | ZNF638-IT1    | PTX3      |
| FGF17      | AC099560.2  | IGSF10        | ADAR      |
| ABCA8      | AC099789.1  | KLF9          | MED12L    |
| LINC01562  | AC104339.1  | NME9          | HIP1R     |
| FXYD6      | AC104563.1  | CD300E        | CYP1A1    |
| ARHGAP15   | AC104791.2  | KIAA1614      | CCNL1     |
| THRB-IT1   | AC104981.1  | NCR3LG1       | MB21D2    |
| LINC01460  | AC105250.1  | IL6           | SEMA3A    |
| AC073571.1 | AC105942.1  | RP11-415J8.3  | ALCAM     |
| MUC5B      | AC106795.1  | ADAMTS9-AS1   | MYD88     |
| RN7SL274P  | AC107375.1  | RP11-752L20.3 | SOD2      |
| COL9A3     | AC108058.1  | SPDYA         | CFAP54    |
| CROCC2     | AC108134.1  | GADD45A       | SP100     |
| AC005696.4 | AC108925.1  | HIF1A-AS2     | KIF20A    |
| ABI3       | AC109322.1  | USP53         | SYNE1     |
| BACH2      | AC109829.2  | EGLN3         | SCN3A     |
| MAL        | AC110285.6  | FAM110C       | INHBA     |
| AC091132.5 | AC110749.1  | C11orf96      | NR3C1     |
| ZBP1       | AC112777.1  | NAV2-AS5      | OTUD1     |
| AL445665.1 | AC113398.1  | CTD-2033D15.2 | SLC12A7   |
| SSUH2      | AC113935.1  | GLDN          | FOS       |
| RGL4       | AC114498.1  | SLED1         | IL32      |
| PPP1R1B    | AC114728.1  | NAMPTP1       | TFRC      |
| AP001207.3 | AC115223.1  | APOLD1        | LINC00944 |
| NR1I3      | AC116049.1  | HILPDA        | SCARNA5   |
| POU2F2     | AC116407.2  | FOSB          | FZD4      |
| LINC01134  | AC116533.1  | CYR61         | FST       |
| AC138866.2 | AC116914.2  | EGR1          | IRAK2     |
| AC079949.1 | AC121761.1  | RP11-417F21.1 | B4GALT5   |
| AC138866.1 | AC124067.4  | NR4A3         | GCA       |
| IFIT1      | AC125437.1  | SLC19A2       | SQLE      |
| LINC02832  | AC125807.1  | PTX3          | MT2A      |
| CRIP1      | AC125807.2  | PTGS2         | NUAK2     |
| RBM34      | AC127502.1  | LIF           | TRAFD1    |
| MIR99AHG   | AC127502.2  | BRD7P4        | NFKBIE    |
| IRF8       | AC129507.1  | CTD-2026K11.6 | CFH       |
| IL15RA     | AC131011.2  | RP11-212E4.1  | KYNU      |
| DYSF       | AC131235.2  | FGG           | CNP       |
| AC114498.1 | AC132192.2  | RP1-309I22.2  | GRB10     |
| LINGO4     | AC132812.1  | AC007278.3    | CD274     |
| AC011466.4 | AC133134.1  | RP11-212I21.3 | PSMB9     |
| AC015967.2 | AC136475.5  | RP1-29C18.10  | CSF1      |
| STAC2      | AC136475.9  | RP11-314N13.9 | RPS6KC1   |
| TGM3       | AC138305.3  | AC007278.2    | TRIM31    |
| BCL2L14    | AC144530.1  | RP11-635L1.2  | BTN3A3    |
| C10orf82   | AC145285.2  | SLCO4A1-AS1   | APOL3     |
| AP001020.2 | AC145350.2  | RP11-393I2.2  | ANXA4     |
| CDYL2      | AC146944.3  | RP11-291I6.2  | TGM2      |
| AC099489.1 | AC159540.2  | CTD-2184D3.5  | MOV10     |
| FRMD6-AS1  | AC211476.10 | SDCBPP1       | SNHG3     |
| OASL       | AC211476.5  | EDN2          | CTSS      |
| LETM2      | AC234781.1  | CCL20         | HDAC9     |
| MX2        | AC240565.3  | SLC5A8        | LGMN      |
| AL691477.1 | AC240565.4  |               | BRD2      |
| AL162258.2 | AC241952.2  |               | PRKDC     |
| PLEKHD1    | AC243964.4  |               | REL       |
| VASH2      | AC244669.1  |               | KMT2C     |

Table S6

|            |              |  |            |
|------------|--------------|--|------------|
| HERC5      | AC245297.1   |  | TNIP1      |
| AC004815.1 | AC245297.4   |  | RMRP       |
| RNF139-AS1 | AC246787.1   |  | RMRP       |
| ZFHX2      | ACAA1        |  | TNFRSF10B  |
| CMPK2      | ACACB        |  | CYP24A1    |
| RUSC2      | ACAD8        |  | ZBP1       |
| CPED1      | ACADVL       |  | SNORD17    |
| ZBTB8A     | ACAP3        |  | CHD2       |
| ODF3B      | ACAT2        |  | SPOCK2     |
| IFITM1     | ACBD5        |  | ACACA      |
| ECM1       | ACBD6        |  | PGK1       |
| CD53       | ACBD7        |  | FAP        |
| IFIT3      | ACD          |  | LGALS3BP   |
| AC016590.1 | ACHE         |  | PLSCR1     |
| FCER1G     | ACKR3        |  | DHCR24     |
| HTN1       | ACO2         |  | AL049839.2 |
| GUSBP3     | ACOT1        |  | AF117829.1 |
| ZNF324B    | ACOT13       |  | PELI1      |
| AEN        | ACOT2        |  | AMBRA1     |
| NHLRC4     | ACOT8        |  | PGAP3      |
| CHDC2      | ACOT9        |  | ADRB2      |
| FABP6      | ACP2         |  | LINC02068  |
| H2AC20     | ACP5         |  | SRPK2      |
| ZNF250     | ACRBP        |  | CXCL2      |
| PTGER2     | ACSF2        |  | AREG       |
| IFITM3     | ACSF3        |  | CLTRN      |
| PLEKHM3    | ACSL1        |  | CBX6       |
| SMAD9      | ACSS1        |  | TNFAIP3    |
| SPRR2A     | ACTB         |  | CEBPB      |
| TBX6       | ACTG1P17     |  | SERPINA3   |
| ZC3H3      | ACTL6A       |  | NEDD4      |
| CD37       | ACTN1        |  | F2RL1      |
| IFI44L     | ACTN4        |  | SEMA7A     |
| CROCC      | ACTR1A       |  | HMGCR      |
| AL031282.2 | ACTR1B       |  | UBN2       |
| PIK3AP1    | ACTR3        |  | ARL14      |
| SLC2A5     | ACTR3B       |  | TLR3       |
| ISG15      | ACTR5        |  | PIK3R3     |
| ZNF579     | ACVR1        |  | KRT17      |
| RSAD2      | ACVR1B       |  | LIF        |
| SYT12      | ACVR1C       |  | CFLAR      |
| AC127164.1 | ACVRL1       |  | SPAG9      |
| AKNA       | ADA          |  | RCAN1      |
| AC025580.3 | ADA2         |  | PSME2      |
| WDR49      | ADAM11       |  | MIR155HG   |
| XRRA1      | ADAM15       |  | TM4SF4     |
| AC027243.1 | ADAM17       |  | CREB5      |
| GUSBP2     | ADAM19       |  | ABL2       |
| ING1       | ADAM1A       |  | ATP9A      |
| H4C14      | ADAM8        |  | ST3GAL2    |
| AC020741.1 | ADAMTS1      |  | FOSB       |
| RAMP2-AS1  | ADAMTS2      |  | APOBEC3G   |
| C1orf229   | ADAMTS3      |  | PLXNA2     |
| H4C15      | ADAMTS9      |  | CD59       |
| NUPR1      | ADAMTS9-AS1  |  | CD24       |
| AC009646.2 | ADAMTSL3     |  | SP140L     |
| BCDIN3D    | ADAMTSL4-AS1 |  | RNVU1-28   |
| ISG20      | ADAMTSL5     |  | GADD45B    |
| MT2A       | ADAR         |  | RIPK2      |
| CFAP46     | ADARB1       |  | ETV3       |

Table S6

|               |            |  |          |
|---------------|------------|--|----------|
| MUC5AC        | ADAT2      |  | IFITM3   |
| AC111149.2    | ADCK2      |  | SNORA63  |
| CHP2          | ADCY3      |  | LASP1    |
| SPTB          | ADCY4      |  | HDLBP    |
| CCL5          | ADCY5      |  | ACO1     |
| DLEC1         | ADCY6      |  | CMTM4    |
| RNF222        | ADCY9      |  | SORT1    |
| LBHD1         | ADD1       |  | TSPAN8   |
| NLRC3         | ADD3       |  | MAP4K4   |
| IL1RN         | ADGRD1     |  | UNC93B1  |
| P2RX7         | ADGRD2     |  | IRF1-AS1 |
| EPHA10        | ADGRE1     |  | TMBIM6   |
| PNRC1         | ADGRE2     |  | CASC19   |
| PLPPR2        | ADGRE5     |  | VAT1     |
| FER1L5        | ADGRF2     |  | MYH9     |
| MAPK12        | ADGRF5P2   |  | RNF19B   |
| RP11-706O15.5 | ADGRG1     |  | BRI3BP   |
| AL592211.1    | ADGRG3     |  | TRAF1    |
| PML           | ADGRL2     |  | THEMIS2  |
| PLAAT2        | ADH5       |  | BAZ2B    |
| AC138932.1    | ADH7       |  | LDHA     |
| CA5A          | ADIPOR1    |  | HSPA5    |
| USP18         | ADIPOR2    |  | LGALS4   |
| SPI1          | ADIRF-AS1  |  | RELB     |
| HNRNPA1P40    | ADK        |  | SLC12A2  |
| SPRR2E        | ADM5       |  | SEPTIN9  |
| MCF2L         | ADNP       |  | XBP1     |
| FGR           | ADNP2      |  | PLS1     |
| PPP1R16B      | ADPRM      |  | TNFSF15  |
| CCDC33        | ADRA2A     |  | KIAA0100 |
| ENKD1         | ADRM1      |  | NCAPD2   |
| MARCKSL1      | ADSL       |  | ATP1A1   |
| AC026523.2    | ADSS1      |  | CCNB2    |
| CFAP74        | ADSS2      |  | SDC1     |
| HMOX1         | AEBP1      |  | SMURF1   |
| GPR65         | AEBP2      |  | ENDOD1   |
| NINL          | AEN        |  | ZEB2     |
| AP001107.1    | AF165147.1 |  | SLC3A2   |
| MICB          | AFAP1      |  | ITGB1    |
| OAS2          | AFAP1L1    |  | BACH2    |
| UBE2T         | AFDN       |  | ZBTB20   |
| MAP4K2        | AFF4       |  | MCL1     |
| RPL37         | AFG3L1P    |  | DCP1A    |
| IRF7          | AFG3L2     |  | FRS2     |
| NTAN1         | AFTPH      |  | NUDT3    |
| IFI27         | AGAP1      |  | HIVEP2   |
| DTX2P1        | AGAP10P    |  | NUCKS1   |
| AC027290.3    | AGAP3      |  | EPHA4    |
| ABHD8         | AGAP4      |  | SDC4     |
| UBE2L6        | AGAP6      |  | N4BP1    |
| AC019117.3    | AGAP7P     |  | C3       |
| TEKT2         | AGBL5      |  | MYCBP2   |
| AC118344.4    | AGER       |  | IL15RA   |
| NATD1         | AGFG1      |  | NEDD9    |
| BEX2          | AGFG2      |  | ACKR4    |
| GNL3L         | AGK        |  | GPBP1    |
| SRCIN1        | AGMO       |  | MSMO1    |
| SAMD9         | AGO1       |  | UHRF1BP1 |
| LINC01551     | AGPAT2     |  | DHCR7    |
| SGTB          | AGPAT4     |  | NFAT5    |

Table S6

|               |            |  |            |
|---------------|------------|--|------------|
| TNFRSF14-AS1  | AGRN       |  | DAB2IP     |
| SERPING1      | AGTR1      |  | CMTR1      |
| BICD2         | AGTRAP     |  | YBX1       |
| SRGAP3-AS2    | AHCTF1     |  | EEF1A1     |
| DUSP5         | AHDC1      |  | SPP1       |
| PRR29         | AHNAK      |  | ARL6IP1    |
| AC008079.1    | AHR        |  | MLKL       |
| CD96          | AHRR       |  | TRIM25     |
| RP11-706O15.3 | AHSA2P     |  | ANXA2P2    |
| RN7SL718P     | AIDA       |  | SEC16B     |
| AHNAK2        | AIF1L      |  | SMCHD1     |
| NIN           | AIFM2      |  | RN7SL4P    |
| OCEL1         | AIM2       |  | BTN2A2     |
| CYP2F1        | AIMP1      |  | SNORA74A   |
| CCND3         | AIMP2      |  | ARHGEF28   |
| RPS15         | AIP        |  | NAPA       |
| MUC13         | AJ003147.3 |  | H2BU1      |
| AKAP12        | AJM1       |  | RSRC2      |
| GUSBP1        | AJUBA      |  | TRIM56     |
| SPINK5        | AK3        |  | AC107959.3 |
| ZNF76         | AK7        |  | TOP2B      |
| PTCHD4        | AKAP1      |  | FDPS       |
| CRYBG3        | AKAP10     |  | ASPM       |
| ZFP36         | AKAP11     |  | IER5       |
| CARD16        | AKAP12     |  | EGOT       |
| DHX35         | AKAP13     |  | CPEB3      |
| SAMD9L        | AKAP17A    |  | KPNA2      |
| ST3GAL2       | AKAP5      |  | SCARNA6    |
| PPDPF         | AKAP8L     |  | DUSP16     |
| EYA1          | AKIRIN1    |  | PER1       |
| SP2           | AKIRIN2    |  | GDF15      |
| CCDC40        | AKNA       |  | GBP5       |
| IFIH1         | AKR1A1     |  | RARRES1    |
| AMOTL2        | AKR1B1     |  | LBR        |
| NUMA1         | AKR1B10    |  | ZNF462     |
| FAM222A       | AKR1B15    |  | RN7SL2     |
| CCDC88C       | AKR1C2     |  | ZBED5      |
| RND1          | AKR1C3     |  | TAPBP      |
| UBA52         | AKR1C7P    |  | IDI1       |
| ARHGAP39      | AKR7A2     |  | NCAPG      |
| WDR62         | AKT1       |  | SECTM1     |
| AC134407.2    | AKT2       |  | PATL1      |
| SCGB1A1       | AKT3       |  | DAPP1      |
| ATF3          | AL008729.1 |  | CHST9      |
| ZNF500        | AL009174.1 |  | ANXA5      |
| ALPK3         | AL022322.2 |  | HMMR       |
| RP11-589F5.3  | AL031058.1 |  | ARHGAP26   |
| TICAM1        | AL031283.1 |  | CCNB1      |
| UBAP2         | AL031595.3 |  | FDFT1      |
| CEP135        | AL031777.1 |  | ERAP1      |
| ZNF329        | AL033397.1 |  | EHD4       |
| CCDC78        | AL033519.3 |  | AC109326.1 |
| C12orf50      | AL034379.1 |  | IRF9       |
| EVI2B         | AL034397.3 |  | TAAR3P     |
| YY1AP1        | AL035071.1 |  | RND1       |
| TRIM14        | AL035661.1 |  | AHNAK2     |
| NKX3-1        | AL049555.1 |  | AC015688.4 |
| CCDC159       | AL049840.6 |  | RICTOR     |
| JPX           | AL049873.1 |  | BTN3A2     |
| ZNF335        | AL109806.1 |  | GTPBP1     |

Table S6

|            |            |  |                |
|------------|------------|--|----------------|
| MRTFA      | AL118516.1 |  | UBE2Z          |
| FOXG1      | AL121603.2 |  | DUSP5          |
| CCDC106    | AL121895.1 |  | ZNF274         |
| SYTL5      | AL121944.2 |  | ASAP2          |
| COTL1      | AL121949.1 |  | AP2M1          |
| OAS1       | AL133260.1 |  | CASP1          |
| H2AC6      | AL133335.1 |  | NAV2           |
| AC004151.1 | AL135745.1 |  | UBD            |
| MUC21      | AL135818.1 |  | H2AZ2          |
| HOOK1      | AL158050.1 |  | BICC1          |
| H2BC18     | AL158801.6 |  | NOCT           |
| OAS3       | AL159141.1 |  | BLZF1          |
| PREX1      | AL161431.1 |  | DPYSL2         |
| CCDC88B    | AL161626.1 |  | MDH1           |
| FTL        | AL161787.1 |  | CRYZL2P-SEC16B |
| FOSB       | AL162151.2 |  | SPRY2          |
| WNK2       | AL162231.2 |  | HERPUD1        |
| MAST3      | AL353804.1 |  | HLA-J          |
| EPST11     | AL355309.1 |  | DUOX1          |
| PCNT       | AL355355.2 |  | FSCN1          |
| NFATC3     | AL356273.6 |  | RPLP0          |
| HIGD2A     | AL356489.2 |  | NAMPT          |
| KIAA0040   | AL391427.1 |  | XRCC5          |
| C15orf62   | AL445363.3 |  | IDH1           |
| CEP112     | AL445490.1 |  | PPP1R10        |
| ARHGAP26   | AL445524.1 |  | PHACTR4        |
| SGSM1      | AL445931.1 |  | CSRNP1         |
| MVB12B     | AL512306.2 |  | SERPINB9       |
| SPAG9      | AL512408.1 |  | ANXA2          |
| SYNPO      | AL513314.2 |  | PERP           |
| PKD1P5     | AL589743.1 |  | PSME1          |
| SHANK2     | AL590705.3 |  | NEDD1          |
| CLEC16A    | AL590867.2 |  | CLUHP3         |
| ELF4       | AL591846.2 |  | H1-0           |
| NCCRP1     | AL592211.1 |  | SH3KBP1        |
| H2AC18     | AL596202.1 |  | CTSD           |
| HELB       | AL627309.5 |  | RASGEF1B       |
| FCGR2A     | AL627309.6 |  | KDM2A          |
| ATP5F1E    | AL669831.1 |  | CYP2J2         |
| SIPA1L3    | AL691432.2 |  | CRYZ           |
| H2AC19     | AL691447.2 |  | SOCS1          |
| SEC24A     | AL732372.2 |  | UPK1B          |
| POLR2M     | AL772337.3 |  | GLCC1          |
| GNG5       | AL807752.1 |  | PLEKHA7        |
| KAT2B      | AL807757.2 |  | GNG12          |
| A2ML1      | AL845472.1 |  | TSC22D2        |
| TNFAIP3    | ALAS1      |  | HLTF           |
| HSF1       | ALDH1A1    |  | TMEM62         |
| MFN1       | ALDH1A3    |  | JUNB           |
| AC126755.1 | ALDH3A1    |  | H2AZ1          |
| ALMS1      | ALDH3B1    |  | SOCS3          |
| FBXO48     | ALDH3B2    |  | AHR            |
| RABIF      | ALDOA      |  | CAT            |
| SLC25A23   | ALDOC      |  | STK10          |
| MCUB       | ALG1L13P   |  | TRAM1          |
| SOBP       | ALG3       |  | KCNV1          |
| HELZ2      | ALG5       |  | AL356488.2     |
| CBX6       | ALG6       |  | SCARNA2        |
| SRCAP      | ALKBH2     |  | NR2F1-AS1      |
| TACC2      | ALKBH5     |  | DSEL           |



Table S6

|           |          |  |            |
|-----------|----------|--|------------|
| FAM193A   | ALKBH6   |  | ACAT2      |
| SERPINB8  | ALKBH7   |  | TET2       |
| PRPF3     | ALOX5AP  |  | CFAP57     |
| SYTL2     | ALPK1    |  | ADM        |
| MBNL1     | ALPL     |  | BACH1      |
| PATL1     | ALS2CL   |  | FUT4       |
| ZMIZ2     | ALYREF   |  | IARS2      |
| ZNF358    | AMBRA1   |  | GMPR       |
| BLZF1     | AMDHD1   |  | TGFBI      |
| STK10     | AMER1    |  | GBP1P1     |
| NIBAN1    | AMFR     |  | SNORA70    |
| CDK18     | AMIGO2   |  | DND1       |
| PHC3      | AMMECR1L |  | PDZD2      |
| FYCO1     | AMN1     |  | SNORA12    |
| LGALS9B   | AMOTL1   |  | GALNT10    |
| TEX9      | AMPD2    |  | CD47       |
| MX1       | AMT      |  | ZNF503     |
| FNDC3B    | AMTN     |  | CD46       |
| CLPB      | ANAPC1   |  | AC019117.4 |
| PRRC2A    | ANAPC11  |  | IL4I1      |
| APOL3     | ANAPC13  |  | COL11A2    |
| CENPBD1P1 | ANAPC2   |  | IFNB1      |
| RAB8A     | ANAPC5   |  | TNFSF13B   |
| DAP       | ANAPC7   |  | RND3       |
| ZNF592    | ANGEL1   |  | SCARNA13   |
| GTDC1     | ANGPTL2  |  | TRIM14     |
| MOB3A     | ANGPTL4  |  | RPS25      |
| TADA2B    | ANK3     |  | ZNF200     |
| SH3KBP1   | ANKDD1A  |  | CEP350     |
| SAMD4B    | ANKDD1B  |  | HMGB3      |
| TRAF3IP2  | ANKFY1   |  | VPS41      |
| SPDEF     | ANKH     |  | ZCCHC2     |
| CDKN2B    | ANKLE2   |  | CTSH       |
| RBMS2     | ANKMY1   |  | RNU1-67P   |
| CIZ1      | ANKMY2   |  | SKIV2L     |
| DUSP3     | ANKRA2   |  | EEF1A1P5   |
| RFX5      | ANKRD10  |  | HMGB1      |
| MAP3K11   | ANKRD11  |  | ZC3H12A    |
| TENT5C    | ANKRD17  |  | PPP1R15B   |
| TBC1D15   | ANKRD22  |  | APLP2      |
| RPL36AL   | ANKRD27  |  | ARAP2      |
| R3HDM2    | ANKRD29  |  | NEB        |
| MLPH      | ANKRD36  |  | WTAP       |
| S100A11   | ANKRD36B |  | MAFF       |
| RND3      | ANKRD37  |  | HACD3      |
| UBB       | ANKRD42  |  | RPS3       |
| PAK4      | ANKRD46  |  | CSKMT      |
| RASSF9    | ANKRD49  |  | SNORD3B-2  |
| ATXN7     | ANKRD50  |  | HSD17B7P2  |
| RUNDC1    | ANKRD54  |  | CENPF      |
| IQCE      | ANKS1A   |  | SEPTIN2    |
| R3HDM1    | ANKZF1   |  | SLFN5      |
| NEK6      | ANO6     |  | EPC1       |
| JADE2     | ANP32A   |  | ANKS1A     |
| TCOF1     | ANPEP    |  | S100A6     |
| CSNK1G2   | ANXA1    |  | CAPN2      |
| TOB2      | ANXA2    |  | DBI        |
| ATN1      | ANXA2R   |  | BIRC5      |
| NCOR2     | ANXA3    |  | IFNL2      |
| IL1R1     | ANXA5    |  | ENO1       |

Table S6

|           |            |  |            |
|-----------|------------|--|------------|
| SPECC1    | ANXA6      |  | BAZ1A      |
| ANKRD17   | ANXA8      |  | ARID4B     |
| BICDL1    | AOC3       |  | CPD        |
| RAB3B     | AOPEP      |  | PSMB8-AS1  |
| VPS37B    | AP000446.1 |  | PSMB10     |
| CRY2      | AP000487.1 |  | HCG27      |
| ACSS1     | AP000640.2 |  | TAGLN2     |
| WARS1     | AP000769.1 |  | CANX       |
| OPTN      | AP000844.2 |  | PATL2      |
| ZNF609    | AP000892.4 |  | DNAH17     |
| PDE4DIP   | AP000936.3 |  | IQGAP3     |
| FCHSD2    | AP000974.1 |  | KIF4A      |
| SP3       | AP001324.1 |  | SLC5A4-AS1 |
| WWC1      | AP001830.1 |  | RBMS2      |
| MLXIP     | AP001972.5 |  | ACTB       |
| ZFP36L2   | AP002784.2 |  | PRKACB     |
| SORBS3    | AP003068.2 |  | MED13      |
| SND1      | AP006621.2 |  | ARL6IP5    |
| FOXK1     | AP006623.1 |  | INTS6      |
| GTPBP1    | AP1B1      |  | GABBR1     |
| CCDC69    | AP1M1      |  | GOLIM4     |
| C6orf132  | AP1M2      |  | RBCK1      |
| LINC00963 | AP1S2      |  | NECTIN2    |
| ADGRG1    | AP2A1      |  | FOSL1      |
| SRSF5     | AP2A2      |  | RNF149     |
| ACTN4     | AP2M1      |  | PPP4R4     |
| EWSR1     | AP3B1      |  | GLO1       |
| HK1       | AP3D1      |  | STING1     |
| TMED2     | AP3M1      |  | FAS        |
| CCZ1B     | AP3M2      |  | H2AW       |
| PSMD2     | AP3S1      |  | FADS1      |
| VAMP3     | AP3S2      |  | RBM39      |
| CTNND1    | AP4M1      |  | CITED2     |
| ARRDC3    | AP5Z1      |  | BNIP3L     |
| RDH10     | APBA3      |  | CIITA      |
| EIF3CL    | APBB1      |  | DIP2B      |
| PRKAR1A   | APBB1IP    |  | MFSD14A    |
| PPP2CB    | APBB3      |  | SUN2       |
| TSPYL1    | APC        |  | CAPS       |
| SRP9      | APEH       |  | NT5E       |
| SMARCA2   | APEX2      |  | VTRNA1-3   |
| GLUL      | APH1A      |  | STMN1      |
| RBM25     | API5       |  | AL136295.5 |
| TNFRSF21  | APLF       |  | TSN        |
| SELENBP1  | APLP1      |  | SERPINB10  |
| DHCR24    | APLP2      |  | MAOB       |
| MAT2A     | APOBEC3A   |  | TPX2       |
| EIF3C     | APOBEC3C   |  | AL021578.1 |
| SCARB2    | APOBEC3G   |  | KIAA0040   |
| TMPRSS4   | APOBR      |  | GABRP      |
| EIF4G1    | APOC1      |  | IFNL3      |
| ENC1      | APOD       |  | FOXO1      |
| HNRNPH1   | APOL1      |  | ARL5B      |
| WDR1      | APOL3      |  | IFI6       |
| ADSS2     | APOL6      |  | PTTG1IP    |
| TMEM123   | APOLD1     |  | VAV3       |
| IL33      | APOO       |  | CXCL1      |
| CCZ1      | APP        |  | CD2AP      |
| FBXL5     | APPL1      |  | CDKN1A     |
| ZBTB7A    | APRT       |  | HLA-DQB1   |

Table S6

|         |                           |  |            |
|---------|---------------------------|--|------------|
| HNRNPK  | APTR                      |  | CRIP2      |
| PLEKHB2 | APTX                      |  | REV3L      |
| HNRNPU  | AQP1                      |  | KCNJ15     |
| ARL8B   | AQP3                      |  | LRP2       |
| DHX15   | AQP9                      |  | CLK1       |
| UBQLN1  | AQR                       |  | HLA-DOB    |
| ANXA7   | ARAP1                     |  | PLCG2      |
| NDRG2   | ARAP3                     |  | CXXC4      |
| TOMM20  | ARC                       |  | GTPBP2     |
| GANAB   | AREG                      |  | EEF1G      |
| CTBP2   | ARF3                      |  | ARHGEF38   |
| CBWD6   | ARF5                      |  | MYH10      |
| ITGB1   | ARFGAP1                   |  | NCEH1      |
| ASPH    | ARFGAP2                   |  | PNP        |
| ATP8B1  | ARFGAP3                   |  | UBC        |
| PFN2    | ARFGEF1                   |  | AC006064.5 |
| DDB1    | ARFGEF3                   |  | ITGB6      |
| ARGLU1  | ARFIP1                    |  | SCARNA10   |
| SF3B1   | ARFIP2                    |  | SETD5      |
| ANPEP   | ARFRP1                    |  | PTTG1      |
| DDX1    | ARGLU1                    |  | SIPA1L2    |
| NCSTN   | ARHGAP1                   |  | CYP51A1    |
| DNAJC10 | ARHGAP10                  |  | KDM6B      |
| DDX5    | ARHGAP15                  |  | DDIT3      |
| IFT57   | ARHGAP17                  |  | SOD2       |
| PGK1    | ARHGAP21                  |  | GPSM2      |
| MIA3    | ARHGAP23                  |  | MBD1       |
| SDC4    | ARHGAP26                  |  | COL7A1     |
| VPS35   | ARHGAP27P1-BPTFP1-KPNA2P3 |  | DUSP4      |
| GALNT7  | ARHGAP29                  |  | IDH2       |
| NAP1L4  | ARHGAP32                  |  | EMP2       |
| SRSF10  | ARHGAP35                  |  | C1R        |
| COPB1   | ARHGAP4                   |  | HAS2       |
| DDX17   | ARHGAP42                  |  | CD40       |
| RBM39   | ARHGAP44                  |  | TNFRSF10A  |
| TAX1BP1 | ARHGAP9                   |  | AC002480.1 |
| ANKRD12 | ARHGDIA                   |  | EXT1       |
| LMBRD1  | ARHGDIB                   |  | PARP8      |
| CALM2   | ARHGEF1                   |  | AC000120.3 |
| SLC37A3 | ARHGEF10                  |  | AP002990.1 |
| RDX     | ARHGEF10L                 |  | DHFR       |
| ABCD3   | ARHGEF16                  |  | HLA-V      |
| CKAP4   | ARHGEF17                  |  | AMOTL2     |
| TMEM41B | ARHGEF25                  |  | DEPDC1     |
| NFE2L1  | ARHGEF3                   |  | SC5D       |
| EPRS1   | ARHGEF34P                 |  | ITPKC      |
| UBE2Q1  | ARHGEF37                  |  | NFKB1      |
| ERBB3   | ARHGEF5                   |  | CASP8      |
| DIMT1   | ARHGEF7                   |  | VTCN1      |
| RAC1    | ARHGEF9                   |  | KSR1       |
| CALM1   | ARID2                     |  | CDK12      |
| PRSS23  | ARID3A                    |  | RAB24      |
| SFPQ    | ARID3B                    |  | AURKA      |
| EXOC3   | ARID5A                    |  | AC068580.4 |
| ADAM9   | ARIH2                     |  | TUBA1A     |
| XPO1    | ARL10                     |  | RTN3       |
| ACSL5   | ARL13B                    |  | ITGAV      |
| CCT2    | ARL14EP                   |  | RPL3       |
| KDELR1  | ARL2                      |  | AEN        |
| PCMTD2  | ARL3                      |  | TTC28      |

Table S6

|          |                |  |            |
|----------|----------------|--|------------|
| ACTR2    | ARL5B          |  | IL10RA     |
| ALDH3A2  | ARL8A          |  | PIK3R1     |
| RTF1     | ARMC10         |  | POLD2      |
| SH3YL1   | ARMC5          |  | TNFRSF9    |
| ATP6V1A  | ARMC6          |  | ANLN       |
| CBX3     | ARMC8          |  | AP5Z1      |
| MAP2K2   | ARMC9          |  | NOL6       |
| CLSTN1   | ARMCX4         |  | RYR2       |
| ZDHC13   | ARMCX5-GPRASP2 |  | RBM5       |
| LAPTM4A  | ARMCX7P        |  | PTPRF      |
| ANXA2    | ARMH3          |  | SGO2       |
| SEPTIN2  | ARNT2          |  | NEK2       |
| SLC6A6   | ARPC1B         |  | SHROOM2    |
| CLTC     | ARPC2          |  | ZNF263     |
| STIM2    | ARPC3          |  | GBP2       |
| RCBTB1   | ARPC5          |  | ANKRD33B   |
| PSMD14   | ARPC5L         |  | EID1       |
| PCYOX1   | ARPP19         |  | PSAP       |
| SACM1L   | ARRB1          |  | IQGAP1     |
| ST14     | ARRB2          |  | DUSP10     |
| ACVR1B   | ARRDC1         |  | LAD1       |
| SEC61A1  | ARRDC2         |  | SFT2D2     |
| SYNGR2   | ARRDC3         |  | SERBP1     |
| IL13RA1  | ARRDC4         |  | PALMD      |
| CAPZA2   | ARSB           |  | HSD17B14   |
| XPO7     | ARSD           |  | TBL1XR1    |
| CANX     | ARSJ           |  | GPCPD1     |
| GALNT1   | ARSL           |  | GJB1       |
| SDC1     | ARX            |  | HBEGF      |
| MFSD14B  | ASAP3          |  | HACD2      |
| DDX18    | ASB1           |  | ZNF385C    |
| CCNDBP1  | ASB13          |  | ZC3H12C    |
| ADGRF1   | ASB16          |  | USF1       |
| UBE2N    | ASB6           |  | PCGF5      |
| MDFIC    | ASB7           |  | MAGT1      |
| SSR1     | ASB8           |  | SNHG12     |
| CNOT8    | ASCC2          |  | FN1        |
| SDCBP    | ASCC3          |  | ASAH1      |
| RAB5C    | ASF1A          |  | TP53BP2    |
| ERP44    | ASL            |  | MDK        |
| MPZL2    | ASMTL          |  | LPP        |
| HMGXB3   | ASPSCR1        |  | PFKFB3     |
| RSRC2    | ASS1           |  | AC118553.2 |
| KPNA1    | ASXL1          |  | CD55       |
| HSPA9    | ASXL2          |  | SEMA3D     |
| AKR1C3   | ATAD3A         |  | IFI44L     |
| ALCAM    | ATAD3B         |  | LINC02701  |
| CTNNB1   | ATF1           |  | LIPA       |
| GAPDH    | ATF3           |  | NNT        |
| GSN      | ATF4           |  | ANP32E     |
| TFCP2L1  | ATF6B          |  | CIT        |
| PDCD4    | ATF7           |  | ACAA2      |
| DYNLT1   | ATG101         |  | JMJD1C     |
| QSOX1    | ATG16L1        |  | SNPH       |
| GOLGA1   | ATG16L2        |  | CD63       |
| ESYT2    | ATG2A          |  | SARAF      |
| HSP90AA1 | ATG2B          |  | ODAM       |
| RBBP9    | ATG4A          |  | DARS2      |
| AAGAB    | ATG4B          |  | MAP4       |
| CD46     | ATG4C          |  | MED1       |

Table S6

|           |            |  |           |
|-----------|------------|--|-----------|
| TAP1      | ATG9A      |  | SERINC5   |
| HIGD1A    | ATN1       |  | SUCO      |
| CLDN7     | ATOX1      |  | CXCL3     |
| GM2A      | ATP10A     |  | PA2G4P4   |
| KIF21A    | ATP11A     |  | PCLO      |
| MARK3     | ATP12A     |  | FA2H      |
| PAICS     | ATP13A1    |  | GALNT1    |
| NFKB1     | ATP13A2    |  | DUSP8     |
| HNRNPA2B1 | ATP1A1     |  | BCL2L14   |
| EIF5B     | ATP1A3     |  | H3-3B     |
| WEE1      | ATP2A3     |  | PPP2R3A   |
| CDC42SE2  | ATP2B1     |  | LMAN1     |
| USP48     | ATP2B1-AS1 |  | PSMA6     |
| ANKRD36B  | ATP2B4     |  | NKX3-1    |
| HNRNPL    | ATP2C2     |  | DEPP1     |
| RCAN3     | ATP5F1A    |  | AHCYL2    |
| ALDH3A1   | ATP5F1B    |  | GTF2B     |
| SRPRA     | ATP5F1D    |  | SNIP1     |
| FMO3      | ATP5F1E    |  | MORF4L1   |
| CLCN3     | ATP5F1     |  | ZNF697    |
| UGP2      | ATP5MD     |  | SREBF2    |
| NIPAL2    | ATP5MF     |  | PDXK      |
| NCKAP1    | ATP5MPL    |  | H2BC14    |
| RAB5A     | ATP5PB     |  | RPL7      |
| SLC38A2   | ATP5PD     |  | HES4      |
| EIF1AX    | ATP5PF     |  | LSS       |
| DECR1     | ATP5PO     |  | HLA-DRB1  |
| SLC25A3   | ATP6V0A1   |  | GPT2      |
| SLC44A2   | ATP6V0A2   |  | ARHGAP11A |
| CP        | ATP6V0A4   |  | PRR15     |
| PSAP      | ATP6V0D1   |  | SNORA68   |
| GRN       | ATP6V0E1   |  | IGFBP4    |
| SLC20A1   | ATP6V1B2   |  | MKI67     |
| MARCHF5   | ATP6V1C1   |  | SEMA3E    |
| IGFBP3    | ATP6V1F    |  | GPI       |
| SON       | ATP6V1G1   |  | PLCH1     |
| GOT1      | ATP6V1H    |  | ABCD3     |
| SLC15A2   | ATP7A      |  | ERBB2     |
| ACADM     | ATP8B2     |  | HK2       |
| SLC30A7   | ATRN       |  | STC2      |
| CCT5      | ATRX       |  | ZFP36L2   |
| SORT1     | ATXN10     |  | KRT19     |
| TMEM87B   | ATXN1L     |  | PPP1CB    |
| VAV1      | ATXN2      |  | BAG1      |
| PLRG1     | ATXN2L     |  | IER2      |
| FBP1      | ATXN3      |  | CELSR3    |
| EIF2S3    | ATXN7L3    |  | MASTL     |
| IARS2     | AUNIP      |  | PDGFRL    |
| TMBIM6    | AUP1       |  | RPL27A    |
| MAOA      | AURKAIP1   |  | LIFR      |
| HSPA5     | AURKB      |  | NOD1      |
| B4GALT5   | AUTS2      |  | NT5DC2    |
| COX6C     | AXIN1      |  | PAM       |
| CHL1      | AXIN2      |  | C1S       |
| MFSD1     | AXL        |  | PCYOX1    |
| LINC01578 | AZIN1      |  | CLDN10    |
| BUB3      | B2M        |  | H1-10     |
| TRA2A     | B3GAT3     |  | STON2     |
| ATP5PB    | B3GNT2     |  | CD68      |
| POLR2B    | B3GNT5     |  | ATP1B1    |

Table S6

|           |             |  |            |
|-----------|-------------|--|------------|
| ACSL3     | B3GNT6      |  | ADAM9      |
| SRSF3     | B4GALT2     |  | SLIT2      |
| DHX29     | B4GALT3     |  | RPS6       |
| RAB1A     | B4GALT7     |  | IGF2       |
| SCNN1A    | BAALC       |  | MYO1C      |
| WASHC2C   | BACE1       |  | RFX5       |
| IMPAD1    | BACE2       |  | NAMPTP1    |
| GALNT12   | BAG1        |  | MNS1       |
| LAMP2     | BAG3        |  | AFDN       |
| ATXN10    | BAG6        |  | ABTB2      |
| SPTLC1    | BAHD1       |  | BUB1B      |
| FDX1      | BAIAP2      |  | NIBAN2     |
| TM4SF1    | BAIAP2L1    |  | IL7R       |
| TMEM50B   | BAK1        |  | LMO4       |
| ATP5F1A   | BANF1       |  | AC083837.1 |
| RBM6      | BANP        |  | SRI        |
| B2M       | BAP1        |  | RN7SL1     |
| NPC2      | BARD1       |  | SUMF1      |
| PERP      | BASP1       |  | COL16A1    |
| ELOC      | BATF2       |  | TSPAN6     |
| ANXA3     | BAX         |  | LDLR       |
| SLBP      | BAZ1B       |  | DENND4A    |
| TMED10    | BAZ2A       |  | TMA7       |
| CPA4      | BAZ2B       |  | HNRNPR     |
| EFTUD2    | BBOF1       |  | FAM53C     |
| LDHB      | BBS1        |  | NCMAP      |
| MMUT      | BBS12       |  | OR52K3P    |
| EEF1A1P6  | BBS2        |  | PSMA4      |
| SRI       | BBS4        |  | MIR3609    |
| LINC00511 | BCAP29      |  | PRC1       |
| SSB       | BCAP31      |  | INSIG1     |
| SKP1      | BCAR1       |  | USP5       |
| AKIRIN1   | BCAR3       |  | LINC02542  |
| DERL1     | BCAS1       |  | ZNF620     |
| ATRX      | BCAT1       |  | AC132217.2 |
| UNC5B     | BCAT2       |  | IRAK1      |
| TMEM30B   | BCDIN3D-AS1 |  | ICAM1      |
| SLC44A1   | BCKDK       |  | SLC25A28   |
| LTA4H     | BCL11A      |  | HELB       |
| SEPHS2    | BCL2A1      |  | MAP3K20    |
| ACTG1     | BCL2L1      |  | VDAC1      |
| IRF2BPL   | BCL2L13     |  | HLA-DMB    |
| AQP5      | BCL2L14     |  | TGOLN2     |
| NDUFS8    | BCL2L2      |  | PBXIP1     |
| STT3B     | BCL3        |  | CDCA3      |
| A4GALT    | BCL6        |  | SNHG1      |
| TUBA1A    | BCL7A       |  | CHAC1      |
| COPS8     | BCL7B       |  | OVOL1      |
| NDUFA10   | BCL7C       |  | AIF1L      |
| PRXL2A    | BCL9        |  | ARRDC4     |
| GDE1      | BCL9L       |  | AC022034.1 |
| DARS1     | BCLAF3      |  | ARC        |
| ANXA1     | BCOR        |  | VCL        |
| NUCB2     | BCR         |  | AL109918.1 |
| ID1       | BCS1L       |  | ANXA11     |
| FMO2      | BDKRB2      |  | ARSD       |
| COG2      | BECN1       |  | VPS35      |
| PSMC5     | BEND7       |  | LMNB1      |
| RSRP1     | BEST1       |  | LYZ        |
| NDFIP1    | BET1L       |  | C15orf48   |

Table S6

|            |          |  |  |            |
|------------|----------|--|--|------------|
| B4GALT1    | BEX1     |  |  | AC107959.1 |
| RPL6P27    | BEX4     |  |  | CPEB4      |
| KIFAP3     | BHLHE40  |  |  | AKR1C3     |
| F3         | BICD1    |  |  | FGFR3      |
| KARS1      | BICD2    |  |  | PNRC1      |
| OSTC       | BICRAL   |  |  | GRINA      |
| IDH1       | BID      |  |  | ATP5F1A    |
| JAG1       | BIN1     |  |  | RGMB       |
| GLT8D1     | BIN2     |  |  | SNORA71A   |
| KYNU       | BIN3     |  |  | AFF4       |
| CMTM6      | BIRC5    |  |  | HSPB8      |
| SDR16C5    | BIRC6    |  |  | SAR1A      |
| EMB        | BLCAP    |  |  | SH3BGRL2   |
| CCDC47     | BLMH     |  |  | RNF128     |
| PROM1      | BLOC1S1  |  |  | AC025580.2 |
| APP        | BLVRB    |  |  | GCNT4      |
| MIPEP      | BLZF1    |  |  | CTDSPL     |
| C2CD2      | BMERB1   |  |  | PAXIP1-AS2 |
| TMEM33     | BMP1     |  |  | AC018644.1 |
| CD164      | BMP2     |  |  | AC106886.6 |
| MDH1       | BMPR1AP2 |  |  | DDB1       |
| TFCP2      | BMS1     |  |  | AGO1       |
| TMPRSS11D  | BMS1P1   |  |  | PLEKHB1    |
| NR2F2      | BMS1P17  |  |  | ANXA9      |
| VPS26A     | BMS1P22  |  |  | IKBKE      |
| CAST       | BMS1P8   |  |  | AHCY       |
| GSTK1      | BNIP1    |  |  | ALDH7A1    |
| YWHAB      | BNIP3P1  |  |  | PRDX5      |
| TXNDC17    | BNIP3P11 |  |  | MYC        |
| CCN2       | BOD1     |  |  | OAZ1       |
| CKMT1A     | BOLA3    |  |  | DAG1       |
| PSMD11     | BRAF     |  |  | GNB4       |
| PKM        | BRAT1    |  |  | IFRD1      |
| METTL21A   | BRCA2    |  |  | LARS1      |
| LAPTM4B    | BRD1     |  |  | ERRFI1     |
| PMPCB      | BRD2     |  |  | MARCKS     |
| PRNP       | BRD3     |  |  | HRH1       |
| SEC63      | BRD3OS   |  |  | C4A        |
| TMEM165    | BRD8     |  |  | PODXL      |
| CAV2       | BRD9     |  |  | EZR        |
| PYGL       | BRI3     |  |  | NCOA3      |
| ARPC5      | BRK1     |  |  | ROR1       |
| TMEM150C   | BRMS1    |  |  | SMARCC1    |
| CD63       | BRWD1    |  |  | GPAT4      |
| PLS3       | BRWD3    |  |  | PTPRS      |
| HLF        | BSDC1    |  |  | PRR11      |
| AC087473.1 | BST1     |  |  | CH25H      |
| ATP6V0D1   | BTBD1    |  |  | ITGAM      |
| PSMB3      | BTBD19   |  |  | PTMA       |
| NOMO1      | BTBD3    |  |  | SQSTM1     |
| GTF2E2     | BTBD7    |  |  | SAMD4A     |
| OAT        | BTF3L4   |  |  | INO80D     |
| CD151      | BTF3L4P2 |  |  | TRIO       |
| ALDH2      | BTG2     |  |  | HLA-DPA1   |
| FBXO3      | BTN2A2   |  |  | SLC44A4    |
| MORN2      | BTN3A2   |  |  | CTNNA1     |
| CTBS       | BTNL9    |  |  | RTL9       |
| STOM       | BUB3     |  |  | MBNL3      |
| RNF149     | BUD13    |  |  | SLC9A7     |
| MAP3K5     | BUD23    |  |  | FTL        |

Table S6

|          |            |  |            |
|----------|------------|--|------------|
| ERLIN1   | BX248409.1 |  | SLC25A25   |
| ERMP1    | BX284668.2 |  | FOSL2      |
| SMIM15   | BX679664.1 |  | RPS4X      |
| CCDC80   | BX679664.3 |  | IL12A      |
| HSP90B1  | BYSL       |  | SNRPD2     |
| CKMT1B   | BZW1P2     |  | RBL2       |
| TSPAN3   | C10orf91   |  | PDGFA      |
| STAM2    | C11orf1    |  | CNN3       |
| ABHD5    | C11orf24   |  | KIAA1217   |
| MSMO1    | C11orf49   |  | TCN1       |
| RBM5     | C11orf71   |  | ARID5B     |
| TM9SF3   | C11orf86   |  | CHD8       |
| ATP1B1   | C11orf95   |  | MPC2       |
| SARAF    | C11orf96   |  | CASP7      |
| AMFR     | C12orf10   |  | B3GNT5     |
| DYNC2LI1 | C12orf43   |  | CHEK2      |
| H3-3A    | C12orf49   |  | Z93241.1   |
| RNF145   | C12orf57   |  | AC005515.1 |
| ERG28    | C12orf75   |  | SLC26A2    |
| TUBA1C   | C14orf132  |  | ZNF217     |
| RBM3     | C15orf39   |  | AL162581.1 |
| GLB1     | C15orf48   |  | RN7SK      |
| PGD      | C16orf58   |  | SNORA49    |
| USP47    | C16orf91   |  | HLA-K      |
| TAGLN2   | C17orf58   |  | PIP5K1A    |
| RETREG2  | C17orf80   |  | SYNPO      |
| TMX4     | C17orf97   |  | NUSAP1     |
| EXOC1    | C18orf21   |  | MSH6       |
| MAT2B    | C19orf25   |  | TMEM59     |
| VPS25    | C19orf48   |  | SPAG5      |
| NUP107   | C19orf84   |  | DPYSL3     |
| ADAM15   | C1GALT1    |  | STT3B      |
| ARPC3    | C1orf109   |  | H2BC11     |
| SYPL1    | C1orf112   |  | PFN2       |
| TGFBR1   | C1orf116   |  | HTATSF1    |
| DSG2     | C1orf162   |  | UQCRH      |
| RPL4P4   | C1orf194   |  | PDGFD      |
| SELENOP  | C1orf198   |  | CLINT1     |
| EPCAM    | C1orf21    |  | AL121594.1 |
| S100A6   | C1orf216   |  | PDE1C      |
| COG6     | C1QBP      |  | SNORD10    |
| ANKRD10  | C1QL4      |  | CUX1       |
| WDR33    | C1QTNF1    |  | ZNF787     |
| LRRC8D   | C1QTNF6    |  | DHRS2      |
| MMP14    | C1S        |  | SCARNA9    |
| RWDD4    | C2         |  | OPHN1      |
| SDF4     | C20orf194  |  | ITPRIPL2   |
| DLD      | C20orf27   |  | YWHAQ      |
| FHL2     | C20orf96   |  | NXF1       |
| SLC35F5  | C21orf91   |  | BMP2       |
| TACSTD2  | C22orf39   |  | INPP4B     |
| ASAH1    | C22orf46   |  | ARPP19     |
| GUF1     | C2CD2      |  | DNAJA4     |
| ENO1     | C2CD4A     |  | DNAJC22    |
| LUC7L3   | C2orf42    |  | SCP2       |
| MTDH     | C3         |  | SNAI1      |
| JKAMP    | C3AR1      |  | KLF10      |
| H2AZ2    | C3orf38    |  | CPEB2      |
| ERAP1    | C3orf62    |  | LINC00472  |
| TMEM192  | C4A        |  | PGRMC1     |



Table S6

|            |            |  |            |
|------------|------------|--|------------|
| RCN1       | C4B        |  | OTUD4      |
| WASH6P     | C4orf3     |  | MAP3K13    |
| ITGB5      | C4orf33    |  | SCARNA12   |
| SLC35A2    | C5AR1      |  | PLS3       |
| TTC19      | C5AR2      |  | APOBEC3F   |
| OCIAD1     | C5orf30    |  | STX19      |
| ADAM28     | C5orf51    |  | APOL4      |
| P4HB       | C6orf120   |  | USP43      |
| SFN        | C6orf132   |  | C3orf52    |
| SLC39A7    | C6orf136   |  | ROS1       |
| EIF4A3     | C6orf47    |  | TPM4       |
| TMEM30A    | C6orf62    |  | DDX39B     |
| GPD2       | C7orf25    |  | ZNF441     |
| CD59       | C7orf26    |  | HOMER2     |
| GTF2H2B    | C7orf50    |  | RNF111     |
| PON2       | C8orf33    |  | HLA-L      |
| HACD3      | C8orf34    |  | HSD17B4    |
| GSS        | C8orf37    |  | NCALD      |
| TUFM       | C8orf44    |  | PLK3       |
| ATP2C1     | C8orf58    |  | SLC39A10   |
| CACHD1     | C8orf82    |  | PTP4A2     |
| CA12       | C9orf116   |  | PHF11      |
| MBOAT2     | C9orf64    |  | PIWIL4     |
| THYN1      | C9orf72    |  | ADAM8      |
| PDIA6      | CA1        |  | NFIA       |
| LEMD3      | CA12       |  | RPS3A      |
| RPN1       | CAB39      |  | ITGB5      |
| PTTG1IP    | CAB39L     |  | CDK1       |
| PRDX1      | CABIN1     |  | TMSB4X     |
| GAA        | CABLES1    |  | CYP2B6     |
| ABCC3      | CACNA1A    |  | AGRN       |
| IER3IP1    | CACNA1C    |  | ERLIN2     |
| EGFR       | CACNG6     |  | AC027290.2 |
| ANXA4      | CACNG7     |  | ATP13A3    |
| IGFBP2     | CACTIN     |  | CHMP3      |
| SLC27A2    | CACUL1     |  | GSR        |
| TRAPPC3    | CAD        |  | MOB3C      |
| OS9        | CADM1      |  | RPL41      |
| SLC18B1    | CADM4      |  | DNPEP      |
| ALOX15     | CADPS2     |  | SBNO2      |
| GNS        | CALCOCO1   |  | MMAB       |
| RRN3       | CALCOCO2   |  | MSI2       |
| PIGX       | CALHM2     |  | C15orf39   |
| ARL6IP1    | CALHM6     |  | PRKAR2A    |
| RPL7AP66   | CALML3-AS1 |  | TTC26      |
| AC004069.1 | CALR       |  | CD83       |
| LGR4       | CAMKK1     |  | ESYT1      |
| LRG1       | CAMKK2     |  | AC245033.1 |
| SPARCL1    | CAMP       |  | AC073548.1 |
| TMEM87A    | CAMSAP1    |  | MAP2       |
| ALDH1A1    | CAMSAP2    |  | TRA2A      |
| LMAN2      | CAMTA1     |  | HS2ST1     |
| AC007318.1 | CAMTA2     |  | PAICS      |
| DDOST      | CANT1      |  | BTN2A1     |
| CHPF       | CANX       |  | HNMT       |
| CTSB       | CAP1       |  | PTPN11     |
| RASA1      | CAPN10     |  | EPS8       |
| SLC2A1     | CAPN8      |  | DEPDC1B    |
| CFH        | CAPRN2     |  | HDGF       |
| TM9SF2     | CAPZA1     |  | GSN        |

Table S6

|            |          |  |            |
|------------|----------|--|------------|
| EML3       | CAPZB    |  | UGGT1      |
| CTSH       | CARD16   |  | CPSF1P1    |
| HNRNPA1P4  | CARD17   |  | SRFBP1     |
| ERLIN2     | CARD6    |  | SNORA21    |
| MTRNR2L9   | CARD8    |  | ZNF627     |
| LRP5       | CARHSP1  |  | AKAP8L     |
| SEMA3A     | CARS2    |  | ZNF292     |
| GFM2       | CASC3    |  | RCN2       |
| HNRNPA1L2  | CASC7    |  | JPT2       |
| PIGG       | CASC9    |  | AC007952.4 |
| RRM1       | CASKIN1  |  | ACHE       |
| TSPAN13    | CASP1    |  | ZNF704     |
| TMEM68     | CASP10   |  | SAPCD2     |
| KRT5       | CASP4    |  | RPS8       |
| ACVR1      | CASP5    |  | LAMA2      |
| ATP1A1     | CASP7    |  | MBTPS1     |
| PRODH      | CASP8    |  | SRCAP      |
| RPAP2      | CASP9    |  | ZNF317     |
| MFSD11     | CASTOR3  |  | MLF1       |
| FDFT1      | CAT      |  | PIEZO1     |
| MFSD14C    | CAV1     |  | MRPL3      |
| ANKRD36    | CAV2     |  | ARPC5      |
| SGK1       | CAVIN1   |  | MYLK       |
| NEU1       | CAVIN3   |  | NR4A1      |
| CLDN4      | CBFA2T2  |  | CTH        |
| SCGB2A1    | CBFA2T3  |  | AC093010.3 |
| ERLEC1     | CBL      |  | ZNF442     |
| EEF1A1P5   | CBLB     |  | ZBTB21     |
| AL391121.1 | CBLN3    |  | SYDE1      |
| POR        | CBR1     |  | ECH1       |
| RAB3IP     | CBWD5    |  | JADE2      |
| FAM3B      | CBX4     |  | HMGCS1     |
| CALR       | CBX6     |  | ODF3B      |
| AC073333.1 | CBX7     |  | NR2F1      |
| EBPL       | CBY1     |  | SPAG17     |
| NPTN       | CC2D1A   |  | H2BC18     |
| HSD17B13   | CC2D1B   |  | HADHA      |
| RPS21      | CCAR1    |  | ASNS       |
| NIFK       | CCAR2    |  | STARD5     |
| ALS2CL     | CCDC102B |  | ZFYVE26    |
| PSEN2      | CCDC113  |  | RPL5       |
| RCN2       | CCDC114  |  | JUND       |
| CHKA       | CCDC115  |  | GIGYF2     |
| GTF2H2C    | CCDC12   |  | CASP4      |
| TMA7       | CCDC124  |  | HIPK3      |
| ALDH7A1    | CCDC130  |  | TBC1D22B   |
| CD81       | CCDC137  |  | FLRT3      |
| RTN4       | CCDC14   |  | IFT122     |
| DHX36      | CCDC148  |  | CHSY3      |
| SNRPA1     | CCDC151  |  | EBP        |
| DNAJC1     | CCDC184  |  | LUCAT1     |
| HNRNPA1P35 | CCDC186  |  | ACTN2      |
| FTH1P10    | CCDC22   |  | AL358075.4 |
| HNRNPAB    | CCDC3    |  | ARHGAP24   |
| FUCA2      | CCDC30   |  | SPC25      |
| ADK        | CCDC38   |  | ABLIM1     |
| FMO5       | CCDC43   |  | SYNPO2     |
| RTN3       | CCDC57   |  | DCLRE1C    |
| ASCC3      | CCDC59   |  | CLK4       |
| PSME1      | CCDC60   |  | LGALS3     |

Table S6

|            |           |  |            |
|------------|-----------|--|------------|
| WASH4P     | CCDC66    |  | IFNL4      |
| TFB2M      | CCDC68    |  | CYFIP2     |
| REEP5      | CCDC69    |  | TMED10     |
| TMEM51     | CCDC71    |  | PAPOLA     |
| WSB1       | CCDC71L   |  | ITGA6      |
| SREK1      | CCDC74A   |  | MTF2       |
| RTN3P1     | CCDC84    |  | IRF2       |
| RARS1      | CCDC85C   |  | ETFB       |
| HADH       | CCDC86    |  | RRM1       |
| MBOAT1     | CCDC88A   |  | ATP5PB     |
| PGAP4      | CCDC9     |  | C4B        |
| FAAH2      | CCHCR1    |  | AC097625.2 |
| SMG1P4     | CCK       |  | BDP1       |
| AC008810.1 | CCL2      |  | SPATS2L    |
| TLR2       | CCL3L3    |  | TMEM41B    |
| ZMPSTE24   | CCL4      |  | IFT80      |
| HNRNPA1P10 | CCL7      |  | CDKN2B     |
| PAPSS2     | CCL8      |  | PLA2G4C    |
| AGL        | CCM2      |  | CREBRF     |
| TMEM9      | CCN2      |  | RPS24      |
| TMEM9B     | CCN5      |  | MAFG       |
| TSPAN1     | CCNA1     |  | ERMP1      |
| CLN5       | CCNB1     |  | HEXD       |
| TMEM59     | CCND1     |  | EGR2       |
| AL592114.1 | CCND3     |  | TEX15      |
| GUSB       | CCNDBP1   |  | AVPI1      |
| ANAPC4     | CCNG2     |  | GCH1       |
| COMMD7     | CCNI      |  | ALDH1A3    |
| MAP3K6     | CCNJ      |  | RACGAP1    |
| ANKRD66    | CCNJL     |  | DDX17      |
| DSE        | CCNL1     |  | GPR160     |
| GCLC       | CCNL2     |  | RUBCN      |
| PRSS8      | CCNT1     |  | AC068831.8 |
| CYP4F12    | CCNT2     |  | SPTLC2     |
| ABCE1      | CCNT2-AS1 |  | NDUFV1     |
| ENPP4      | CCPG1     |  | DDX5       |
| ABCA5      | CCR1      |  | KIF14      |
| GLUD2      | CCR5AS    |  | CCDC85C    |
| CALM2P2    | CCR7      |  | FGFR4      |
| KLHL42     | CCRL2     |  | ARPC2      |
| PRMT7      | CCS       |  | KIF23      |
| ITGB6      | CCT4      |  | PRXL2A     |
| SESN1      | CCT5      |  | ST13       |
| FTH1P2     | CCT7      |  | C1orf116   |
| CAMK2G     | CCT8      |  | RPL6       |
| STAM       | CCZ1      |  | OXCT1      |
| MANF       | CCZ1B     |  | PCDH9      |
| THOC3      | CD151     |  | RAB11A     |
| MSTO1      | CD164     |  | CASP10     |
| ZPR1       | CD24      |  | XRCC6      |
| INPP1      | CD248     |  | USP13      |
| NOMO2      | CD27-AS1  |  | ITM2A      |
| LRRN1      | CD2BP2    |  | ATP6AP2    |
| SRSF11     | CD320     |  | MDGA1      |
| SELENOI    | CD37      |  | AC040162.1 |
| TOPORS     | CD38      |  | ENAH       |
| PLTP       | CD4       |  | TNF        |
| SLC39A6    | CD47      |  | RALBP1     |
| TMEM106C   | CD53      |  | KLK6       |
| CD47       | CD55      |  | AC099489.1 |

Table S6

|            |          |  |            |
|------------|----------|--|------------|
| SORD2P     | CD59     |  | CDC14A     |
| AL158206.1 | CD63     |  | SLC38A1    |
| KRT10      | CD74     |  | TANK       |
| EIF4A1P4   | CD82     |  | EIF4EBP2   |
| UNC93B3    | CD86     |  | NPLOC4     |
| CXADR      | CD8A     |  | G0S2       |
| CUEDC1     | CD9      |  | KIF15      |
| IL10RB     | CD93     |  | FRYL       |
| YWHAZP4    | CD99L2   |  | PCSK9      |
| ATP5F1B    | CDA      |  | RBBP6      |
| PRKAR2B    | CDADC1   |  | SLC16A7    |
| SMC4       | CDC14A   |  | BTF3       |
| PTDSS1     | CDC16    |  | AC005070.3 |
| COPG2      | CDC25B   |  | PJA2       |
| GTF2F2     | CDC27    |  | PPTC7      |
| LONRF1     | CDC34    |  | LINC02432  |
| RPL10P9    | CDC37    |  | TMEM167A   |
| HLA-B      | CDC40    |  | CARHSP1    |
| RFNG       | CDC42    |  | YEATS2     |
| MAN1B1     | CDC42BPA |  | ACTN1      |
| EIF4HP1    | CDC42BPB |  | RPS20      |
| H3P36      | CDC42EP1 |  | ELF1       |
| LACTB      | CDC42EP2 |  | TRAF4      |
| CNIH1      | CDC42EP4 |  | NAALADL2   |
| MAPKAPK3   | CDC7     |  | SNORA71D   |
| JPT1       | CDCA2    |  | FAM168A    |
| SMAP1      | CDCA7    |  | YRDC       |
| CYP3A5     | CDH11    |  | ZBTB10     |
| SPTSSA     | CDH17    |  | ARID3B     |
| TTC29      | CDH2     |  | SAA2       |
| C1D        | CDH23    |  | FAM168B    |
| PA2G4P6    | CDH5     |  | ZBTB43     |
| DPAGT1     | CDHR4    |  | CYB5A      |
| SMARCAD1   | CDHR5    |  | PLBD1      |
| RPL7AP6    | CDIP1    |  | CORO1C     |
| BX679664.3 | CDK10    |  | RNVU1-31   |
| PLS1       | CDK11B   |  | CERK       |
| F11R       | CDK13    |  | AC022506.1 |
| RMDN3      | CDK17    |  | PLK1       |
| DDAH2      | CDK18    |  | IFI30      |
| BCAP29     | CDK4     |  | COX7C      |
| FSCN1      | CDK5RAP1 |  | MVD        |
| AKAP1      | CDK5RAP3 |  | UHMK1      |
| ITFG1      | CDK6     |  | PLEC       |
| ARVCF      | CDK7     |  | NPFFR2     |
| LOXL4      | CDK9     |  | RPS17      |
| AC090498.1 | CDKAL1   |  | HDX        |
| FAM3D      | CDKL3    |  | CWC25      |
| HNRNPA1P7  | CDKN1A   |  | PVR        |
| HNRNPA1P12 | CDKN1B   |  | MGAM2      |
| RHBDL2     | CDKN2AIP |  | MAZ        |
| MPP7       | CDKN2B   |  | ZNF7       |
| UBE2E3     | CDR1     |  | MAST4      |
| SCPEP1     | CDR2L    |  | EREG       |
| DNAJB11    | CDV3     |  | ARPIN      |
| SDHA       | CEACAM1  |  | FNBP4      |
| LAMB3      | CEACAM3  |  | HMGA1      |
| VAR51      | CEACAM6  |  | ARL14EPL   |
| NT5DC1     | CELF1    |  | FLNA       |
| PBXIP1     | CELSR1   |  | SNORA57    |

Table S6

|            |           |  |            |
|------------|-----------|--|------------|
| TAP2       | CEMIP2    |  | TKT        |
| HLA-F      | CENPB     |  | EEF1B2     |
| CDH1       | CENPC     |  | TOR1B      |
| PRELID1    | CENPN     |  | ATP5F1C    |
| UPK1B      | CENPT     |  | ZNF92      |
| PSMD1      | CENPX     |  | RBBP7      |
| TMTC4      | CEP120    |  | ANGPT2     |
| ITGAV      | CEP164    |  | NIPAL3     |
| NUDT12     | CEP170    |  | SNORA74D   |
| PGAM4      | CEP19     |  | LDHB       |
| RNF26      | CEP192    |  | CAPZB      |
| CCDC65     | CEP250    |  | HMGN3      |
| FARSB      | CEP295    |  | MTHFD2     |
| PARP2      | CEP63     |  | OLFM4      |
| VIPR1      | CEP68     |  | COPA       |
| ARL3       | CEP83     |  | IRS2       |
| ENY2       | CEP85L    |  | SLC28A3    |
| SDCBPP3    | CEP95     |  | SOX4       |
| BCAP31     | CERK      |  | ERGC1      |
| B4GALT4    | CERS2     |  | HDAC1      |
| RAMAC      | CERS3     |  | SUPT6H     |
| C5orf15    | CERS5     |  | CBX3       |
| FTH1P8     | CERS6     |  | HSCB       |
| MAD2L1BP   | CERT1     |  | MTF1       |
| RAC1P2     | CFAP161   |  | CDKN3      |
| NAAA       | CFAP20    |  | CCND3      |
| GLULP4     | CFAP300   |  | ANP32A     |
| EXOSC8     | CFAP36    |  | ARHGAP27   |
| MT-TY      | CFAP52    |  | ANGPTL4    |
| BLOC1S4    | CFAP58-DT |  | ACP6       |
| AC144530.1 | CFAP77    |  | SNORA48    |
| TMEM45B    | CFAP97    |  | ATF4       |
| ABHD3      | CFDP1     |  | SLC3A1     |
| HLA-L      | CFL1      |  | RNU4-2     |
| AC113935.1 | CFLAR     |  | ICMT       |
| PRPF39     | CGB2      |  | ATP5PD     |
| CTNNAL1    | CGB5      |  | CCNG1      |
| VPS35P1    | CGN       |  | AC020916.1 |
| HSP90AB2P  | CGRRF1    |  | NDUFB6     |
| UNC93B7    | CHAC1     |  | RACK1      |
| CHPT1      | CHCHD1    |  | CHP1       |
| TNC        | CHCHD10   |  | TUBA1B     |
| DDX50      | CHCHD2    |  | PARK7      |
| MLYCD      | CHCHD3    |  | SLC1A5     |
| AQP3       | CHCHD4    |  | TRIB1      |
| LRRCC1     | CHCHD6    |  | HGSNAT     |
| TPBG       | CHCHD7    |  | DNM1       |
| GJB3       | CHD1      |  | CYP1B1     |
| PABPC1P4   | CHD2      |  | SYT16      |
| SLC25A17   | CHD3      |  | PRKCI      |
| SLC44A3    | CHD4      |  | AL049629.2 |
| SLC26A4    | CHD6      |  | TRHDE      |
| PRDX4      | CHD7      |  | AP2B1      |
| GGH        | CHD8      |  | RPS9       |
| HNRNPA1P8  | CHFR      |  | TJAP1      |
| LSAMP      | CHI3L1    |  | CPXM1      |
| CDS2       | CHI3L2    |  | WDR74      |
| FAT1       | CHID1     |  | NIPSNAP2   |
| ATP6AP2    | CHIT1     |  | ARHGDIB    |
| MRAP2      | CHKA      |  | PROM1      |

Table S6

|            |                              |  |            |
|------------|------------------------------|--|------------|
| G6PC3      | CHL1                         |  | C6orf58    |
| ERO1B      | CHMP1A                       |  | BCAS1      |
| CLK1       | CHMP1B                       |  | CCNA2      |
| SNX14      | CHMP4B                       |  | RNU4-1     |
| PTGES3P3   | CHMP5                        |  | PLAAT2     |
| CCT6A      | CHMP6                        |  | LINC02605  |
| AC006511.4 | CHN1                         |  | KHDC4      |
| KLF9       | CHPF                         |  | TMEM181    |
| FKBP1C     | CHPF2                        |  | FSD1L      |
| PIPSL      | chr22-38_28785274-29006793.1 |  | SH2B3      |
| FAM162A    | CHRAC1                       |  | ANXA1      |
| AC024293.1 | CHRN4                        |  | KANSL1     |
| TMEM147    | CHROMR                       |  | WFDC5      |
| ALG1       | CHST10                       |  | SPTA1      |
| CCDC59     | CHST11                       |  | TGIF2      |
| DBP        | CHST2                        |  | TLCD4      |
| TF         | CHST6                        |  | PCM1       |
| FKBP9      | CHSY1                        |  | FRAS1      |
| RPL14P1    | CHTOP                        |  | CDC20      |
| TMEM43     | CHUK                         |  | GSPT1      |
| ACAD10     | CIAO1                        |  | VANGL1     |
| BORCS5     | CIAO2A                       |  | ARFGEF1    |
| EMC7       | CIAPIN1                      |  | TICAM1     |
| ACTA1      | CIB1                         |  | USP15      |
| UNC93B6    | CIC                          |  | LMO2       |
| EDEM2      | CICP23                       |  | KIF1C      |
| PTK7       | CIITA                        |  | CERT1      |
| ARSDP1     | CIPC                         |  | DSC3       |
| TMED7      | CIR1                         |  | FNBP1L     |
| TUSC3      | CIRBP                        |  | AKR1B10    |
| PGRMC1     | CISD2                        |  | THRA       |
| UBLCP1     | CISD3                        |  | GPR107     |
| AC026271.1 | CITED2                       |  | MTHFD1     |
| BMI1       | CKB                          |  | CALM1      |
| DYNC112P1  | CKS1B                        |  | CENPI      |
| ARMT1      | CLCA3P                       |  | RNU6ATAC   |
| TLR1       | CLCF1                        |  | CDK17      |
| GPC1       | CLCN2                        |  | PLEKHB2    |
| VDAC1P1    | CLCN3                        |  | NUDT21     |
| HNRNPKP4   | CLCN6                        |  | CTSE       |
| RRAGA      | CLCN7                        |  | NAP1L1     |
| KIT        | CLDN1                        |  | CHD3       |
| ST13P3     | CLDN2                        |  | CTNNB1     |
| AC136632.1 | CLDN4                        |  | AC013394.1 |
| AL391244.2 | CLDN5                        |  | SET        |
| ETHE1      | CLDN7                        |  | PFKFB2     |
| TMED1      | CLDND1                       |  | PLAC8      |
| RPL7P10    | CLEC1A                       |  | H1-5       |
| HEXB       | CLEC4A                       |  | IL15       |
| MOSPD1     | CLEC4E                       |  | GALNT2     |
| SLC52A2    | CLEC7A                       |  | AC087721.2 |
| KDSR       | CLIC3                        |  | RASGRF2    |
| SELENOS    | CLIC4                        |  | RNU2-2P    |
| HLA-A      | CLIP2                        |  | PER2       |
| ADH1A      | CLIP4                        |  | INO80      |
| RPL22P1    | CLK1                         |  | CACYBP     |
| DNAJB9     | CLK3                         |  | FARP1      |
| AC083873.1 | CLK4                         |  | TRIB3      |
| DENND10P1  | CLMP                         |  | ETFA       |
| FUCA1      | CLPP                         |  | CTTN       |

Table S6

|            |          |  |            |
|------------|----------|--|------------|
| HSPA8P5    | CLPTM1L  |  | B3GNT2     |
| LPCAT3     | CLPX     |  | MRPS16     |
| SLC35B2    | CLSTN1   |  | SMC2       |
| EXOSC9     | CLSTN3   |  | ATP5F1E    |
| TAGLN2P1   | CLTB     |  | PHKB       |
| ATP5MC3    | CLUH     |  | HARS1      |
| EIF3FP3    | CLUHP3   |  | ATL3       |
| COL6A3     | CMAHP    |  | GIMAP2     |
| CHCHD1     | CMC1     |  | TFPI       |
| TMCO1      | CMC2     |  | SLC30A9    |
| PABPC3     | CMIP     |  | CKAP5      |
| TP63       | CMPK2    |  | NDUFA4     |
| CTSC       | CMTM3    |  | SNORD3B-1  |
| HSD17B12   | CMTR2    |  | RPL35A     |
| CEACAM3    | CMYA5    |  | BCL3       |
| SMG1P1     | CNBP     |  | TTL11      |
| PSMC1P1    | CNGB1    |  | HNF4A      |
| ELMO3      | CNIH4    |  | TBC1D5     |
| AL158801.6 | CNKSR1   |  | DIAPH2-AS1 |
| UQCRC1     | CNOT1    |  | G6PD       |
| HLA-V      | CNOT2    |  | CEP55      |
| MGST1      | CNOT3    |  | KLHL29     |
| NTS        | CNOT7    |  | AC104389.5 |
| AL133477.1 | CNPY2    |  | RPS21      |
| H3P44      | CNRIP1   |  | SCARNA7    |
| PSENN      | CNST     |  | PLEKHG7    |
| RPL7AP34   | CNTLN    |  | ZNF207     |
| PSPC1      | CNTN1    |  | DESI1      |
| LAMC1      | CNTROB   |  | AK4        |
| AL121769.1 | COA5     |  | GM2A       |
| NDUFA12    | COASY    |  | VILL       |
| MT-TL1     | COG1     |  | H2BC6      |
| AC106795.1 | COG3     |  | LMCD1      |
| AC022968.1 | COG4     |  | OR4C6      |
| LRRIQ1     | COG6     |  | PLOD2      |
| LRRC17     | COG7     |  | TSPAN13    |
| UFD1       | COL12A1  |  | EIF4B      |
| UXS1       | COL16A1  |  | PPP2R5D    |
| AC008065.1 | COL1A1   |  | MFSD12     |
| KRT6B      | COL20A1  |  | TNFRSF1B   |
| HMG2P17    | COL4A1   |  | SPNS2      |
| ALOX15P1   | COL4A4   |  | PGD        |
| RPL37AP1   | COL5A1   |  | PRDX3      |
| ATP6AP1    | COL5A2   |  | SEPHS1     |
| AC099670.1 | COL5A3   |  | CBX5       |
| BMP3       | COL8A1   |  | TCF12      |
| FKSG70     | COL9A2   |  | ACTN4      |
| FAM171A1   | COLGALT1 |  | ACSF2      |
| RPN2       | COMM10   |  | ANKRD10    |
| HLA-H      | COMM3    |  | ARHGAP44   |
| EEF1A1P38  | COMM4    |  | PARP3      |
| THNSL2     | COMM7    |  | ERVK3-1    |
| PDIA3      | COMTD1   |  | SLC25A6    |
| AC064799.1 | COP1     |  | LYST       |
| KTN1       | COPA     |  | CAV1       |
| AC209007.1 | COPB1    |  | ATP11B     |
| AC104619.3 | COPE     |  | PRDX2      |
| SYT8       | COPS3    |  | SPRY4      |
| COQ5       | COPS5    |  | PPP1CA     |
| MSH2       | COPS7A   |  | SNORA23    |

Table S6

|            |            |  |            |
|------------|------------|--|------------|
| NPC1       | COPS7B     |  | NIN        |
| UQCRFS1P1  | COPZ1      |  | CMPK1      |
| MORF4L1P1  | COPZ2      |  | CDCA7      |
| UBBP4      | COQ2       |  | SNORA54    |
| GPR89A     | COQ4       |  | TNNT1      |
| MFSD5      | COQ8A      |  | ZNF689     |
| SERPINB4   | COQ9       |  | XPO6       |
| HNRNPA1P48 | CORIN      |  | AC010197.2 |
| AP000936.3 | CORO1C     |  | GPC4       |
| SIRT3      | COX10-AS1  |  | ZNF300P1   |
| AC092115.2 | COX16      |  | AC124319.3 |
| RPS27P29   | COX18      |  | FKRP       |
| CYP26A1    | COX411     |  | SELENOF    |
| ATP13A5    | COX5A      |  | MBOAT2     |
| AL109918.1 | COX5B      |  | TTN        |
| PIGO       | COX6A1     |  | TRIOBP     |
| ITM2B      | COX6A1P2   |  | GEM        |
| RPL9P32    | COX6B1     |  | PPP2R5C    |
| PFN1P1     | COX6C      |  | TPGS2      |
| EIF2S2P4   | COX7A1     |  | PBK        |
| HNRNPA3P6  | COX7B      |  | SHMT1      |
| HSP90AB3P  | COX7C      |  | GNPNAT1    |
| PLL        | COX8A      |  | NECTIN3    |
| CLDN1      | CPAMD8     |  | PHC2       |
| ANXA8L1    | CPD        |  | RNF144A    |
| RPL23P8    | CPE        |  | CLMN       |
| AC113404.3 | CPLX1      |  | SERF2      |
| HSP90AA6P  | CPLX2      |  | ATP8B1     |
| RPL7P47    | CPNE3      |  | LCP1       |
| SETP20     | CPNE8      |  | DBN1       |
| PHF14      | CPSF1      |  | AKIRIN1    |
| SRD5A3     | CPSF3      |  | FYB1       |
| SCAMP3     | CPSF4      |  | LMO7       |
| AC244034.1 | CPSF6      |  | NIPSNAP1   |
| TRIAP1     | CPSF7      |  | LMNB2      |
| F2RL1      | CR1        |  | NRIR       |
| PPIAP87    | CR392039.1 |  | SLC9A8     |
| AP002784.2 | CRABP2     |  | SERPING1   |
| SUMO2P1    | CRACR2B    |  | ATP5MG     |
| AC005000.1 | CRAMP1     |  | GSDMD      |
| HLA-C      | CRAT       |  | ECE1       |
| MTATP8P1   | CRCT1      |  | TCIM       |
| KRT18P16   | CREB3      |  | CXADR      |
| SERBP1P5   | CREB3L2    |  | MAFA       |
| RPL4P5     | CREBZF     |  | SUMF2      |
| DCAF13     | CRELD2     |  | DTYMK      |
| SRSF2      | CREM       |  | SLC25A5    |
| SETSIP     | CRIP2      |  | ATRAID     |
| FKBP9P1    | CRIPAK     |  | ARHGAP5    |
| PRCP       | CRISP3     |  | ELK4       |
| CD9        | CRK        |  | APPL1      |
| IFNGR1     | CRNDE      |  | MORF4L1P1  |
| RPL7P9     | CROCC      |  | LPGAT1     |
| TMEM212    | CRTC2      |  | KAT6A      |
| EIF4BP3    | CRTC3      |  | RIPK1      |
| PSCA       | CRY2       |  | NPNT       |
| AL049597.1 | CRYAB      |  | CCDC18     |
| RPL7P32    | CRYBG3     |  | AC079781.5 |
| YWHAZP5    | CRYL1      |  | HEXIM1     |
| AC012085.1 | CRYZL2P    |  | AC008038.1 |



Table S6

|            |               |  |            |
|------------|---------------|--|------------|
| HNRNPCP2   | CS            |  | DCAF11     |
| FTLP3      | CSDE1         |  | CDCA7L     |
| APLP2      | CSE1L         |  | AC016831.1 |
| SETP14     | CSF2RA        |  | RANBP3L    |
| UBE2I      | CSF2RB        |  | MYL6       |
| CDC42P6    | CSF3R         |  | MGAT4B     |
| ANXA8      | CSNK1A1       |  | RAPGEF5    |
| AL354702.1 | CSNK1D        |  | GLUD1      |
| FGFR3      | CSNK1E        |  | SSRP1      |
| H3-5       | CSNK2A2       |  | VDAC3      |
| TSPAN6     | CSNK2B        |  | FANCD2     |
| EIF4A1P2   | CSPG4         |  | TNS3       |
| RPL7P1     | CSRNP1        |  | CDC42      |
| GAPDHP65   | CST7          |  | IRS1       |
| AC105250.1 | CSTA          |  | NKILA      |
| EPHA1      | CSTB          |  | TMEM132A   |
| AC002075.2 | CSTF2         |  | SH3TC1     |
| RPS7P10    | CTA-342B11.3  |  | MICB       |
| EEF1A1P19  | CTBP1         |  | CCDC88A    |
| EIF5AL1    | CTBP1-DT      |  | MIR100HG   |
| RPL10AP2   | CTBS          |  | AC245014.3 |
| ARSD       | CTC1          |  | LSM3       |
| XRCC6P2    | CTCF          |  | RNU12      |
| RPL13AP20  | CTD-2369P2.2  |  | CALM2      |
| AC092597.1 | CTD-2521M24.9 |  | SLC25A22   |
| EIF4BP6    | CTD-3195I5.1  |  | COA3       |
| AC099560.2 | CTDNEP1       |  | LCLAT1     |
| RPL12P38   | CTDP1         |  | MMD2       |
| RPS26P6    | CTDSP1        |  | ADIRF-AS1  |
| LDHBP2     | CTDSP2        |  | HTATIP2    |
| KRT18P11   | CTDSPL        |  | WASHC5     |
| AC004057.1 | CTDSPL2       |  | MCM6       |
| RPL34P26   | CTF1          |  | CENPA      |
| BZW1P2     | CTNNA1        |  | LSM4       |
| AC092683.1 | CTNNB1        |  | ERN1       |
| S100A4     | CTNNBIP1      |  | DLC1       |
| HLA-DRB6   | CTNNBL1       |  | SETD2      |
| C1GALT1C1  | CTNND1        |  | SERTAD1    |
| RPS26P31   | CTPS1         |  | GBF1       |
| SLC5A8     | CTPS2         |  | FZD8       |
| MTCO1P40   | CTR9          |  | MARCKSL1   |
| GAPDHP44   | CTSA          |  | ANO9       |
| RPL7AP11   | CTSC          |  | ACTL6A     |
| PPIC       | CTSE          |  | OIP5-AS1   |
| TMX1       | CTSH          |  | FAM20B     |
| ITGA6      | CTSL          |  | CCR1       |
| GAPDHP61   | CTSS          |  | OAF        |
| PSMC1P5    | CTSZ          |  | SP140      |
| EIF4BP7    | CTTN          |  | PRSS12     |
| PPIAP16    | CTXN1         |  | ZUP1       |
| EEF1A1P7   | CUL1          |  | RPL18      |
| RPSAP19    | CUL4A         |  | ZNF3       |
| AC005480.2 | CUL9          |  | CYB5B      |
| UNC50      | CUTALP        |  | BCL2L13    |
| MIR22HG    | CWC22         |  | STK19      |
| RPS26P8    | CWF19L2       |  | SYNE2      |
| AC115223.1 | CXCL10        |  | ZBTB38     |
| HSPA8P1    | CXCL11        |  | DSC2       |
| DPYD       | CXCL16        |  | JUP        |
| AC126120.1 | CXCL17        |  | MEG8       |

Table S6

|            |          |  |  |            |
|------------|----------|--|--|------------|
| AC016734.1 | CXCL2    |  |  | CD38       |
| RARRES1    | CXCL6    |  |  | PAH        |
| MTCO3P12   | CXCR2    |  |  | CXXC5      |
| DPY30      | CXorf21  |  |  | GNPAT      |
| ALG5       | CXorf40A |  |  | RNPEP      |
| PPIAP66    | CXorf40B |  |  | EXOC3L4    |
| PPIAP43    | CXXC1    |  |  | GANAB      |
| AC112187.1 | CXXC5    |  |  | AC084816.1 |
| PPIAL4C    | CYB561   |  |  | E2F7       |
| MTND4P12   | CYB561A3 |  |  | SCARB2     |
| TMEM183B   | CYB5A    |  |  | KIF12      |
| ACTBP2     | CYB5B    |  |  | GNAS       |
| HLA-G      | CYB5D2   |  |  | STRBP      |
| RPS7P11    | CYB5R1   |  |  | VMA21      |
| NACA3P     | CYB5R2   |  |  | MFSD2A     |
| EEF1A1P29  | CYBB     |  |  | IFNL3P1    |
| AC068522.1 | CYBRD1   |  |  | LRRC20     |
| RPS26P11   | CYC1     |  |  | TUFT1      |
| AC034236.1 | CYFIP1   |  |  | APEH       |
| MTCO2P2    | CYFIP2   |  |  | HOGA1      |
| AC020898.1 | CYHR1    |  |  | TUBB       |
| CLCA4      | CYP19A1  |  |  | SLC16A9    |
| LYPD3      | CYP1A1   |  |  | ATP5MPL    |
| EEF1A1P4   | CYP24A1  |  |  | USP25      |
| AC004552.1 | CYP2J2   |  |  | MYO9A      |
| NAMPTP1    | CYP2R1   |  |  | MICAL3     |
| PPIAP13    | CYP2S1   |  |  | MAPRE1     |
| RPS4XP22   | CYP3A5   |  |  | TPI1       |
| EEF1A1P25  | CYP4F11  |  |  | SFSWAP     |
| TUBAP2     | CYP4F3   |  |  | UROD       |
| CROT       | CYP7B1   |  |  | LONP2      |
| AP000281.2 | CYREN    |  |  | TLK2       |
| RPL10P12   | CYSLTR1  |  |  | SIX4       |
| FTH1P15    | CYSTM1   |  |  | GALNT12    |
| RPL3P4     | CYTH1    |  |  | TNFRSF10D  |
| AC104339.1 | CYTH3    |  |  | RNVU1-27   |
| RPS23P8    | CYTIP    |  |  | BTC        |
| PPIAP31    | DAAM1    |  |  | CHROMR     |
| AC135178.7 | DAAM2    |  |  | C5         |
| RPL10P4    | DAB2IP   |  |  | NR4A3      |
| AC104563.1 | DACT1    |  |  | KNL1       |
| RPS26P47   | DAG1     |  |  | IFNAR1     |
| H3P16      | DAGLB    |  |  | ZFC3H1     |
| FTH1P11    | DANCR    |  |  | GAS5       |
| EEF1A1P16  | DAP      |  |  | TRIM2      |
| YWHAZP3    | DAP3     |  |  | EIF4A1     |
| GAPDHP73   | DAPK2    |  |  | ZHX2       |
| GAPDHP63   | DAPK3    |  |  | CREBL2     |
| AL627402.1 | DAPP1    |  |  | AGR2       |
| AC009245.1 | DARS1    |  |  | AL645929.1 |
| RPS3AP5    | DARS-AS1 |  |  | MAD2L1     |
| H3P6       | DAXX     |  |  | DNAH9      |
| RPL27AP5   | DAZAP1   |  |  | HNRNPUL2   |
| RPS26P15   | DAZAP2   |  |  | KRT7       |
| H3P47      | DBF4B    |  |  | UBASH3B    |
| AC078819.1 | DBN1     |  |  | FBN2       |
| TCN1       | DBNDD1   |  |  | STIM2      |
| HSP90AA2P  | DBNL     |  |  | DIRAS3     |
| FTH1P7     | DBR1     |  |  | OR1F1      |
| RPS7P1     | DCAF10   |  |  | PRKAR1A    |

Table S6

|            |         |  |             |
|------------|---------|--|-------------|
| RPS27AP16  | DCAF11  |  | TMPO        |
| RPL7P19    | DCAF13  |  | C11orf58    |
| TMSB4XP2   | DCAF15  |  | DMBX1       |
| RPS26P28   | DCAF16  |  | RPS10-NUDT3 |
| RPL10AP6   | DCAF4   |  | TNRC6A      |
| PPIAP22    | DCAF5   |  | GRIP2       |
| EEF1A1P8   | DCAF6   |  | FYB2        |
| ADH1B      | DCAF8   |  | JAKMIP3     |
| ATP1B3     | DCAKD   |  | TC2N        |
| PPIAP6     | DCBLD1  |  | CHSY1       |
| RPL3P2     | DCHS1   |  | GABRE       |
| RPL13AP25  | DCLRE1A |  | IL22RA1     |
| MTND6P4    | DCP1A   |  | MARS1       |
| RPS24P8    | DCP1B   |  | KLHL3       |
| AC092865.1 | DCPS    |  | VAMP5       |
| RPL15P20   | DCTD    |  | RUFY4       |
| AL133260.1 | DCTN2   |  | ACOT13      |
| FTH1P16    | DCTN4   |  | TM7SF2      |
| EEF1A1P11  | DCTN5   |  | ASPH        |
| RPS15AP1   | DCTN6   |  | GRWD1       |
| FTH1P3     | DCUN1D3 |  | NECAP1      |
| APOD       | DCUN1D4 |  | FEM1A       |
| AL596275.1 | DDAH1   |  | KMO         |
| RPL15P18   | DDB1    |  | PKP4        |
| RPL17P22   | DDB2    |  | GGCT        |
| KRT6C      | DDHD2   |  | AC091133.1  |
| EIF4A1P10  | DDIT4   |  | ADPRHL2     |
| PDIA3P1    | DDOST   |  | FAM149A     |
| FTH1P20    | DDR2    |  | AMER1       |
| EEF1A1P22  | DDT     |  | LNPB        |
| ANXA2P2    | DDTL    |  | SESN3       |
| AC073072.1 | DDX1    |  | TNFSF9      |
| AC025518.1 | DDX17   |  | AC015849.1  |
| S100A2     | DDX23   |  | U62317.1    |
| RPL7P23    | DDX31   |  | TMEM41A     |
| MTND6P3    | DDX39A  |  | IK          |
| AL009174.1 | DDX39B  |  | PBX1        |
| AC092670.1 | DDX41   |  | SNORD13     |
| PPIAP29    | DDX42   |  | B4GALT4     |
| FTH1P12    | DDX5    |  | NOTCH3      |
| AC090543.3 | DDX51   |  | TMEM245     |
| H3C9P      | DDX54   |  | CSDE1       |
| RPL17P36   | DDX55   |  | AIFM2       |
| MTND5P11   | DDX56   |  | NUP62       |
| MT-TE      | DDX58   |  | ANAPC16     |
| MTCO2P12   | DDX6    |  | CEP57       |
| MTRNR2L1   | DDX60   |  | NYNRIN      |
| HLA-J      | DDX60L  |  | AL355075.4  |
| EEF1A1P12  | DEAF1   |  | RPPH1       |
| EEF1A1P14  | DEF6    |  | PPIAP22     |
| AC091429.1 | DEF8    |  | GBP7        |
| FTH1P5     | DELE1   |  | GMFB        |
| TPT1P9     | DENND11 |  | YWHAE       |
| EEF1A1P13  | DENND2A |  | HMGXB3      |
| AC006386.2 | DENND2B |  | EGLN1       |
| AC012005.1 | DENND2C |  | UGT1A10     |
| RPL41P2    | DENND2D |  | ARL4A       |
| MT-TA      | DENND3  |  | G3BP2       |
|            | DENND4B |  | AL021707.6  |
|            | DENND4C |  | HOOK1       |

Table S6

|  |            |  |  |             |
|--|------------|--|--|-------------|
|  | DENND6A    |  |  | AC008760.2  |
|  | DENR       |  |  | SERPINA4    |
|  | DEPDC5     |  |  | HNRNPU      |
|  | DEPP1      |  |  | FUT8        |
|  | DERL2      |  |  | TLN1        |
|  | DESI1      |  |  | ZNF433      |
|  | DESI2      |  |  | IPO8        |
|  | DGAT1      |  |  | SAMD1       |
|  | DGCR2      |  |  | CPNE2       |
|  | DGCR6      |  |  | WDR75       |
|  | DGCR8      |  |  | RMND5A      |
|  | DGCR9      |  |  | IL1RN       |
|  | DGKD       |  |  | AL138787.2  |
|  | DGKE       |  |  | TTYH3       |
|  | DGKG       |  |  | ADD3        |
|  | DGUOK      |  |  | MRPL24      |
|  | DHCR24     |  |  | OBSL1       |
|  | DHDDS      |  |  | ZNF44       |
|  | DHODH      |  |  | ZNF532      |
|  | DHPS       |  |  | DENND4B     |
|  | DHRS12     |  |  | NBEA        |
|  | DHRS4L1    |  |  | EEF1A2      |
|  | DHRS4L2    |  |  | RNF5        |
|  | DHRS7      |  |  | CDC25C      |
|  | DHRS9      |  |  | HGD         |
|  | DHRSX      |  |  | SBNO1       |
|  | DHX15      |  |  | LSM5        |
|  | DHX16      |  |  | SMCR8       |
|  | DHX29      |  |  | ZSWIM8      |
|  | DHX30      |  |  | PDCL3       |
|  | DHX32      |  |  | IL11        |
|  | DHX35      |  |  | KLHDC7A     |
|  | DHX38      |  |  | DUSP2       |
|  | DHX57      |  |  | OPA1        |
|  | DHX8       |  |  | BCAR1       |
|  | DHX9       |  |  | UPF1        |
|  | DIAPH1     |  |  | THUMPD3-AS1 |
|  | DIDO1      |  |  | AL591222.1  |
|  | DIP2A      |  |  | RAD21       |
|  | DIP2C      |  |  | CXCL9       |
|  | DIPK2A     |  |  | AL645929.3  |
|  | DIS3       |  |  | SNRPD3      |
|  | DIS3L2     |  |  | SPATA2      |
|  | DISP1      |  |  | RPS10       |
|  | DKC1       |  |  | KLC4        |
|  | DKK1       |  |  | HP1BP3      |
|  | DKK3       |  |  | DNMBP       |
|  | DLC1       |  |  | EPB41L1     |
|  | DLEU1      |  |  | KHNYN       |
|  | DLG4       |  |  | ACLY        |
|  | DLGAP1-AS1 |  |  | ITGA5       |
|  | DLL1       |  |  | POLR3D      |
|  | DLL3       |  |  | RAET1L      |
|  | DLL4       |  |  | PLAT        |
|  | DLST       |  |  | CALU        |
|  | DLX1       |  |  | PYGB        |
|  | DM1-AS     |  |  | ZEB1        |
|  | DMAC2      |  |  | AC083862.2  |
|  | DMBT1      |  |  | RECQL5      |
|  | DMBX1      |  |  | ZNF222      |

Table S6

|  |           |  |  |           |
|--|-----------|--|--|-----------|
|  | DMKN      |  |  | LEPROT    |
|  | DMPK      |  |  | PXMP4     |
|  | DMXL2     |  |  | ARHGAP42  |
|  | DNAAF1    |  |  | SLC39A7   |
|  | DNAAF2    |  |  | UNC119B   |
|  | DNAAF3    |  |  | PSMA7     |
|  | DNAH1     |  |  | COPS9     |
|  | DNAH14    |  |  | SNRNP200  |
|  | DNAH7     |  |  | PRR3      |
|  | DNAJA3    |  |  | ATP2C1    |
|  | DNAJB12   |  |  | ADH5      |
|  | DNAJB14   |  |  | HDAC2     |
|  | DNAJB2    |  |  | GATA6     |
|  | DNAJB5    |  |  | RAPGEF2   |
|  | DNAJC10   |  |  | SNCA      |
|  | DNAJC11   |  |  | SYAP1     |
|  | DNAJC16   |  |  | TBCC      |
|  | DNAJC18   |  |  | MAD2L1BP  |
|  | DNAJC2    |  |  | HK1       |
|  | DNAJC3    |  |  | MIER3     |
|  | DNAJC4    |  |  | CDC42BPA  |
|  | DNAJC5    |  |  | CCDC34    |
|  | DNAJC7    |  |  | ERI3      |
|  | DNALI1    |  |  | EP300     |
|  | DNASE1    |  |  | UGT2B7    |
|  | DNM1P51   |  |  | ZFAS1     |
|  | DNM2      |  |  | DYNC2H1   |
|  | DNMBP     |  |  | ZFX       |
|  | DNMT1     |  |  | ODF2      |
|  | DNPEP     |  |  | GET4      |
|  | DNTTIP1   |  |  | LINC00641 |
|  | DNTTIP2   |  |  | LINC00265 |
|  | DOCK1     |  |  | LRRFIP1   |
|  | DOCK10    |  |  | CHCHD2    |
|  | DOCK2     |  |  | IKBIP     |
|  | DOCK4     |  |  | JAZF1     |
|  | DOCK5     |  |  | HSBP1     |
|  | DOCK6     |  |  | WIF1      |
|  | DOCK8     |  |  | OR10AB1P  |
|  | DOCK8-AS1 |  |  | FNIP1     |
|  | DOCK9     |  |  | NR4A2     |
|  | DOHH      |  |  | BBX       |
|  | DOK1      |  |  | EXPH5     |
|  | DOK3      |  |  | FARSB     |
|  | DOK4      |  |  | LYSMD2    |
|  | DOLK      |  |  | FH        |
|  | DONSON    |  |  | IER3      |
|  | DOP1A     |  |  | MIR6891   |
|  | DPF2      |  |  | RNVU1-15  |
|  | DPH1      |  |  | DYRK1A    |
|  | DPH2      |  |  | HSP90AA1  |
|  | DPH5      |  |  | SEPTIN11  |
|  | DPH7      |  |  | MIR320A   |
|  | DPM1      |  |  | ACOX1     |
|  | DPM3      |  |  | RPS23     |
|  | DPP7      |  |  | DCAF6     |
|  | DPT       |  |  | TRPC4     |
|  | DPY19L1   |  |  | RBBP4     |
|  | DPY30     |  |  | LRRN3     |
|  | DPYSL2    |  |  | HFE       |

Table S6

|  |          |  |  |           |
|--|----------|--|--|-----------|
|  | DPYSL3   |  |  | TENT5C    |
|  | DPYSL5   |  |  | CMBL      |
|  | DRAP1    |  |  | KMT2E     |
|  | DRG1     |  |  | SEC24D    |
|  | DROSHA   |  |  | MMUT      |
|  | DSCC1    |  |  | RPL15     |
|  | DST      |  |  | AAR2      |
|  | DSTN     |  |  | C2CD4A    |
|  | DSTYK    |  |  | SLC9A1    |
|  | DTWD1    |  |  | ZBED5-AS1 |
|  | DTX2     |  |  | SMARCC2   |
|  | DTX3     |  |  | RNVU1-6   |
|  | DTX3L    |  |  | EIF3L     |
|  | DTX4     |  |  | NQO1      |
|  | DUOX1    |  |  | FAM107B   |
|  | DUOX2    |  |  | RANBP17   |
|  | DUS2     |  |  | REPS2     |
|  | DUS3L    |  |  | BCL10     |
|  | DUSP1    |  |  | SYT12     |
|  | DUSP10   |  |  | QARS1     |
|  | DUSP16   |  |  | LMAN2     |
|  | DUSP18   |  |  | SUPT7L    |
|  | DUSP23   |  |  | SND1      |
|  | DUSP3    |  |  | HOXB6     |
|  | DUSP7    |  |  | CD109     |
|  | DUSP8    |  |  | PLEKHA2   |
|  | DUX4L2   |  |  | SSTR2     |
|  | DUX4L5   |  |  | TREX1     |
|  | DUX4L6   |  |  | NDC1      |
|  | DUX4L7   |  |  | HLA-G     |
|  | DUXAP9   |  |  | SNORA80B  |
|  | DVL1     |  |  | AKT1S1    |
|  | DYM      |  |  | ANKFY1    |
|  | DYNC1H1  |  |  | RHBDF2    |
|  | DYNC2LI1 |  |  | ZNF629    |
|  | DYNLL1   |  |  | H2AC12    |
|  | DYNLRB1  |  |  | C12orf49  |
|  | DYNLT1   |  |  | LEKR1     |
|  | DYRK2    |  |  | THEM6     |
|  | DYRK3    |  |  | TACC1     |
|  | DYSF     |  |  | CCDC117   |
|  | DZIP1L   |  |  | CCDC174   |
|  | E2F4     |  |  | DNAJA1    |
|  | E2F8     |  |  | NUP98     |
|  | E4F1     |  |  | SCCPDH    |
|  | EBNA1BP2 |  |  | PHKA2     |
|  | EBP      |  |  | RPS19     |
|  | ECE1     |  |  | METRNL    |
|  | ECHDC1   |  |  | TIPRL     |
|  | ECHDC2   |  |  | CBX4      |
|  | ECHDC3   |  |  | MAP4K5    |
|  | ECHS1    |  |  | PSMD10    |
|  | ECI2     |  |  | PIGK      |
|  | ECM1     |  |  | TMEM97    |
|  | ECM2     |  |  | PTPRB     |
|  | ECPAS    |  |  | EFNA1     |
|  | ECSIT    |  |  | ADPGK     |
|  | EDC3     |  |  | UQCRQ     |
|  | EDC4     |  |  | HSPA6     |
|  | EDEM2    |  |  | PPM1L     |

Table S6

|  |           |  |  |            |
|--|-----------|--|--|------------|
|  | EDF1      |  |  | PSORS1C1   |
|  | EDNRA     |  |  | DGLUCY     |
|  | EDRF1     |  |  | SMARCA5    |
|  | EED       |  |  | DAZAP2     |
|  | EEF1A1    |  |  | TPD52L1    |
|  | EEF1A1P5  |  |  | BSDC1      |
|  | EEF1A1P6  |  |  | PIP4K2B    |
|  | EEF1AKMT1 |  |  | E2F8       |
|  | EEF1AKMT3 |  |  | NCAPD3     |
|  | EEF1B2    |  |  | PRPF8      |
|  | EEF1D     |  |  | VPS13C     |
|  | EEF2      |  |  | COPG2      |
|  | EFCAB11   |  |  | G2E3       |
|  | EFEMP2    |  |  | NFX1       |
|  | EFHC1     |  |  | CHD1       |
|  | EFHD2     |  |  | TTC3       |
|  | EFL1      |  |  | SWAP70     |
|  | EFNA1     |  |  | FDCSP      |
|  | EFNA2     |  |  | PPFIBP1    |
|  | EFNB1     |  |  | AF127936.5 |
|  | EFNB2     |  |  | PPP2R5A    |
|  | EFTUD2    |  |  | AC068299.2 |
|  | EGFL7     |  |  | LINC02044  |
|  | EGFLAM    |  |  | HCFC1R1    |
|  | EGLN1     |  |  | HAPLN3     |
|  | EGLN2     |  |  | SCARNA21   |
|  | EGR1      |  |  | TASOR2     |
|  | EGR2      |  |  | EHMT2      |
|  | EHBP1     |  |  | ASAP1      |
|  | EHBP1L1   |  |  | STRAP      |
|  | EHD2      |  |  | TTC39C     |
|  | EHD4      |  |  | GTSE1      |
|  | EHMT1     |  |  | BRAP       |
|  | EIF1      |  |  | UFC1       |
|  | EIF1AD    |  |  | RASAL1     |
|  | EIF1B     |  |  | BRPF1      |
|  | EIF2AK1   |  |  | KCNN1      |
|  | EIF2AK2   |  |  | AL645608.7 |
|  | EIF2AK4   |  |  | EIF4H      |
|  | EIF2B1    |  |  | MMGT1      |
|  | EIF2B4    |  |  | H2AC13     |
|  | EIF2B5    |  |  | ZFP36L1    |
|  | EIF2D     |  |  | SKAP2      |
|  | EIF2S3    |  |  | DENND5A    |
|  | EIF3A     |  |  | AKT3       |
|  | EIF3B     |  |  | HCG4B      |
|  | EIF3C     |  |  | AP1M2      |
|  | EIF3CL    |  |  | TUBB6      |
|  | EIF3D     |  |  | KIAA1549L  |
|  | EIF3F     |  |  | LRCH3      |
|  | EIF3G     |  |  | PDHA1      |
|  | EIF3H     |  |  | URI1       |
|  | EIF3J-DT  |  |  | MVP        |
|  | EIF3K     |  |  | H4C8       |
|  | EIF3L     |  |  | PAIP2B     |
|  | EIF4A1    |  |  | AASS       |
|  | EIF4A2    |  |  | MYORG      |
|  | EIF4A3    |  |  | SYTL5      |
|  | EIF4E2    |  |  | PINLYP     |
|  | EIF4E3    |  |  | HEATR9     |

Table S6

|  |              |  |  |            |
|--|--------------|--|--|------------|
|  | EIF4EBP1     |  |  | FILIP1L    |
|  | EIF4ENIF1    |  |  | ARFIP2     |
|  | EIF4G1       |  |  | GATA4      |
|  | EIF4G3       |  |  | KNSTRN     |
|  | EIF4H        |  |  | PLA2R1     |
|  | EIF5A        |  |  | STEAP4     |
|  | EIF5AL1      |  |  | SOCS2      |
|  | EIF6         |  |  | RUVBL1     |
|  | EIPR1        |  |  | SMARCA1    |
|  | ELAC2        |  |  | SFXN3      |
|  | ELF1         |  |  | RSU1       |
|  | ELF2         |  |  | INTS5      |
|  | ELF4         |  |  | UACA       |
|  | ELK1         |  |  | CD69       |
|  | ELK3         |  |  | STK38      |
|  | ELMOD2       |  |  | BROX       |
|  | ELMOD3       |  |  | ANKRD1     |
|  | ELMSAN1      |  |  | SREK1      |
|  | ELOB         |  |  | RBBP8      |
|  | ELOVL1       |  |  | HLA-DRB5   |
|  | ELP1         |  |  | HSPA2      |
|  | ELP3         |  |  | TNIK       |
|  | EMB          |  |  | RPL31      |
|  | EMC3         |  |  | MAPK3      |
|  | EMC4         |  |  | PKN1       |
|  | EMC7         |  |  | NADSYN1    |
|  | EMC9         |  |  | TTL        |
|  | EME2         |  |  | ACSL4      |
|  | EMG1         |  |  | STX16      |
|  | EMILIN2      |  |  | ATP5MF     |
|  | EML3         |  |  | RPLP0P6    |
|  | EMP1         |  |  | CEP70      |
|  | EMP2         |  |  | PPL        |
|  | EMP3         |  |  | F3         |
|  | ENC1         |  |  | DDX52      |
|  | ENDOD1       |  |  | PAPSS1     |
|  | ENDOV        |  |  | EXOC4      |
|  | ENG          |  |  | WDR73      |
|  | ENGASE       |  |  | C18orf25   |
|  | ENKD1        |  |  | AL137077.2 |
|  | ENKUR        |  |  | IGF2BP3    |
|  | ENO1         |  |  | SELENOK    |
|  | ENO2         |  |  | TRAK2      |
|  | ENO3         |  |  | POLR2B     |
|  | ENOSF1       |  |  | NR1D2      |
|  | ENOX2        |  |  | CADPS2     |
|  | ENSA         |  |  | WDFY1      |
|  | ENTPD4       |  |  | PARPBP     |
|  | ENTPD6       |  |  | RAB1B      |
|  | ENTPD7       |  |  | STK38L     |
|  | ENTR1        |  |  | MAVS       |
|  | EOMES        |  |  | ARMC10     |
|  | EP400        |  |  | CCDC167    |
|  | EP400P1      |  |  | ARHGEF9    |
|  | EPAS1        |  |  | RAB8B      |
|  | EPB41L1      |  |  | HELLS      |
|  | EPB41L2      |  |  | FBXO6      |
|  | EPB41L4A     |  |  | SNX14      |
|  | EPB41L4A-AS1 |  |  | GGA3       |
|  | EPC1         |  |  | KDM5A      |



Table S6

|  |          |  |            |
|--|----------|--|------------|
|  | EPDR1    |  | PXK        |
|  | EPGN     |  | RPS3AP6    |
|  | EPHA2    |  | EIF3E      |
|  | EPHA4    |  | EXTL3      |
|  | EPHB4    |  | TMEM230    |
|  | EPM2AIP1 |  | NR1D1      |
|  | EPN1     |  | PSMD2      |
|  | EPN2     |  | STAT3      |
|  | EPN3     |  | CCNT2      |
|  | EPOP     |  | SRP9       |
|  | EPOR     |  | ZNF267     |
|  | EPS8L2   |  | SPINK1     |
|  | EPS8L3   |  | SMOX       |
|  | EPST11   |  | PIMREG     |
|  | ERBB2    |  | GALM       |
|  | ERC1     |  | RABGAP1L   |
|  | ERCC1    |  | LAPTM4B    |
|  | ERCC5    |  | MYEOV      |
|  | ERGIC1   |  | TNFAIP8L1  |
|  | ERH      |  | RAB10      |
|  | ERI1     |  | NRDC       |
|  | ERN1     |  | APPL2      |
|  | ERP44    |  | MXRA5      |
|  | ERRF1    |  | H4C2       |
|  | ERVK13-1 |  | AC012020.1 |
|  | ESF1     |  | STARD8     |
|  | ESS2     |  | PLAU       |
|  | ESYT1    |  | SNORA84    |
|  | ETS1     |  | MIR3651    |
|  | ETS2     |  | CREBBP     |
|  | ETV1     |  | DNAJC10    |
|  | ETV3     |  | NOSTRIN    |
|  | ETV6     |  | AC243919.1 |
|  | EVA1C    |  | ANO10      |
|  | EVI2B    |  | MIB1       |
|  | EVI5     |  | ZNF140     |
|  | EVL      |  | CLIP1      |
|  | EWSR1    |  | MAP4K3     |
|  | EXO1     |  | PDK1       |
|  | EXOC2    |  | NSDHL      |
|  | EXOC3    |  | TRERF1     |
|  | EXOC4    |  | AC140912.1 |
|  | EXOC6B   |  | HLA-DMA    |
|  | EXOSC3   |  | DHX40      |
|  | EXOSC4   |  | SCD5       |
|  | EXOSC7   |  | ANO6       |
|  | EXOSC8   |  | TOMM20     |
|  | EXOSC9   |  | TSPAN17    |
|  | EXT2     |  | SEC14L2    |
|  | EXTL3    |  | AC008079.1 |
|  | EYA1     |  | PCDH1      |
|  | EYA3     |  | UBE2C      |
|  | EZR      |  | GRIN3A     |
|  | F11R     |  | TRHDE-AS1  |
|  | F2R      |  | AC119150.1 |
|  | F5       |  | PCNP       |
|  | F8A1     |  | C19orf48   |
|  | F8A3     |  | LY75       |
|  | FAAH2    |  | SNHG20     |
|  | FAAP100  |  | RIMKLB     |

Table S6

|             |  |  |            |
|-------------|--|--|------------|
| FABP3       |  |  | DDIT4      |
| FABP6       |  |  | ZFPM2      |
| FADS1       |  |  | RDH11      |
| FADS3       |  |  | CENPU      |
| FAHD2A      |  |  | EPS8L2     |
| FAHD2B      |  |  | MCCC1      |
| FAM104A     |  |  | SPSB1      |
| FAM110B     |  |  | COL8A1     |
| FAM111A     |  |  | CHPF2      |
| FAM114A1    |  |  | ZDHHC2     |
| FAM118A     |  |  | PIGA       |
| FAM118B     |  |  | FAM122C    |
| FAM120B     |  |  | MEGF6      |
| FAM122A     |  |  | IP6K2      |
| FAM122B     |  |  | ABCF1      |
| FAM126A     |  |  | TMEM19     |
| FAM126B     |  |  | SEC24A     |
| FAM131A     |  |  | NCAPH      |
| FAM135A     |  |  | AGPS       |
| FAM13A-AS1  |  |  | AP5B1      |
| FAM13B      |  |  | HSD17B12   |
| FAM151B     |  |  | EDC3       |
| FAM156A     |  |  | EBF4       |
| FAM156B     |  |  | SEPTIN10   |
| FAM157B     |  |  | MIPEP      |
| FAM157C     |  |  | TESK2      |
| FAM160A2    |  |  | UQCRB      |
| FAM160B1    |  |  | NUMA1      |
| FAM160B2    |  |  | COMMD9     |
| FAM162A     |  |  | HAS3       |
| FAM167A     |  |  | RBMS3      |
| FAM168A     |  |  | HAVCR1     |
| FAM168B     |  |  | SESN2      |
| FAM171A2    |  |  | RUVBL2     |
| FAM171B     |  |  | PLCE1      |
| FAM174B     |  |  | VBP1       |
| FAM174C     |  |  | PPIP5K2    |
| FAM177A1    |  |  | VEGFA      |
| FAM177B     |  |  | FKBP9      |
| FAM183A     |  |  | TEX261     |
| FAM189A2    |  |  | KIAA0930   |
| FAM193A     |  |  | UBE2Q2     |
| FAM198B-AS1 |  |  | NEK6       |
| FAM199X     |  |  | AC008957.3 |
| FAM207A     |  |  | ENC1       |
| FAM20B      |  |  | NCAM1      |
| FAM20C      |  |  | IARS1      |
| FAM214A     |  |  | ZNF562     |
| FAM214B     |  |  | HELZ       |
| FAM219B     |  |  | HMGB1P5    |
| FAM220A     |  |  | PTPRU      |
| FAM222B     |  |  | SNRPE      |
| FAM231D     |  |  | TMEM219    |
| FAM234A     |  |  | FAM169A    |
| FAM234B     |  |  | DPY30      |
| FAM32A      |  |  | CARD16     |
| FAM3A       |  |  | LCORL      |
| FAM3C       |  |  | ANKRD17    |
| FAM49A      |  |  | ATRIP      |
| FAM49B      |  |  | CEBPD      |

Table S6

|         |  |  |            |
|---------|--|--|------------|
| FAM50A  |  |  | NMRAL2P    |
| FAM53B  |  |  | LSR        |
| FAM72A  |  |  | DENND3     |
| FAM72B  |  |  | PEBP1      |
| FAM83B  |  |  | AC138811.2 |
| FAM83G  |  |  | METTL7B    |
| FAM86JP |  |  | RLF        |
| FAM8A1  |  |  | NDST1      |
| FAM92A  |  |  | NPC2       |
| FANCA   |  |  | FAM43A     |
| FANCC   |  |  | CTNND2     |
| FAR2    |  |  | TMC4       |
| FARP1   |  |  | MYO6       |
| FARP2   |  |  | IRGQ       |
| FARS2   |  |  | OSBPL8     |
| FARSA   |  |  | IRF6       |
| FARSB   |  |  | NFE2L2     |
| FAS     |  |  | RNU1-2     |
| FASN    |  |  | SNHG15     |
| FASTK   |  |  | NEDD8      |
| FASTKD2 |  |  | PEX16      |
| FASTKD5 |  |  | MGST3      |
| FAT4    |  |  | CEP78      |
| FAU     |  |  | RELA       |
| FAXDC2  |  |  | BX119927.1 |
| FBH1    |  |  | PATJ       |
| FBL     |  |  | HADH       |
| FBLN1   |  |  | RNU4ATAC   |
| FBLN5   |  |  | DNTTIP2    |
| FBN2    |  |  | SMG7       |
| FBRS    |  |  | OAZ2       |
| FBXL12  |  |  | NAV3       |
| FBXL15  |  |  | DHX30      |
| FBXL3   |  |  | CCDC47     |
| FBXL4   |  |  | FYTTD1     |
| FBXL5   |  |  | DMAC1      |
| FBXL7   |  |  | RSF1       |
| FBXO21  |  |  | ID3        |
| FBXO25  |  |  | KCNH8      |
| FBXO27  |  |  | RPL34      |
| FBXO31  |  |  | COX7A2     |
| FBXO32  |  |  | BLVRB      |
| FBXO39  |  |  | RPL22      |
| FBXO42  |  |  | SGK2       |
| FBXO6   |  |  | UBXN6      |
| FBXO9   |  |  | PMVK       |
| FBXW11  |  |  | STRN4      |
| FBXW2   |  |  | AC010733.2 |
| FBXW4   |  |  | AFF1       |
| FBXW5   |  |  | SPDEF      |
| FCER1G  |  |  | RNF11      |
| FCGR1A  |  |  | PSAT1      |
| FCGR1B  |  |  | ACTG1      |
| FCGR2A  |  |  | ANKRD9     |
| FCGR2B  |  |  | NDC80      |
| FCGR2C  |  |  | SDCBP2     |
| FCGR3A  |  |  | CDKN2AIP   |
| FCHO2   |  |  | LYN        |
| FCRLA   |  |  | LIG1       |
| FDCSP   |  |  | STK32A     |

Table S6

|  |          |  |  |            |
|--|----------|--|--|------------|
|  | FDFT1    |  |  | CHML       |
|  | FDPS     |  |  | TYMS       |
|  | FEM1C    |  |  | IMPDH1     |
|  | FEN1     |  |  | RNVU1-29   |
|  | FER      |  |  | AC007192.1 |
|  | FERMT2   |  |  | KPNA1      |
|  | FES      |  |  | AL365436.2 |
|  | FEZ1     |  |  | DSTN       |
|  | FFAR2    |  |  | FANCI      |
|  | FGD4     |  |  | QKI        |
|  | FGD5     |  |  | KMT2B      |
|  | FGD5-AS1 |  |  | KCNC4      |
|  | FGF1     |  |  | PPCS       |
|  | FGF2     |  |  | LAMTOR5    |
|  | FGF5     |  |  | ANKLE2     |
|  | FGF7P6   |  |  | ILRUN      |
|  | FGFR1    |  |  | COX7A2L    |
|  | FGFR1OP2 |  |  | PRKCA      |
|  | FGFR2    |  |  | CNOT6LP1   |
|  | FGFR4    |  |  | HMGB2      |
|  | FGG      |  |  | NDUFS1     |
|  | FGL1     |  |  | ALDH3A2    |
|  | FGR      |  |  | ANKS6      |
|  | FHL1     |  |  | SIK2       |
|  | FHL3     |  |  | MAP3K14    |
|  | FHOD1    |  |  | AP002381.2 |
|  | FIBIN    |  |  | TMEM9      |
|  | FIBP     |  |  | RPS7P1     |
|  | FILIP1   |  |  | SLC7A5     |
|  | FIP1L1   |  |  | SLC35G2    |
|  | FIS1     |  |  | CIAO2A     |
|  | FIZ1     |  |  | LINC01963  |
|  | FJX1     |  |  | CCN1       |
|  | FKBP10   |  |  | WAC        |
|  | FKBP14   |  |  | SLC44A2    |
|  | FKBP1A   |  |  | STT3A      |
|  | FKBP1C   |  |  | RPS18      |
|  | FKBP4    |  |  | VGLL1      |
|  | FKBP8    |  |  | ANK3       |
|  | FKSG62   |  |  | BBS9       |
|  | FKTN     |  |  | ITSN2      |
|  | FLAD1    |  |  | RPTOR      |
|  | FLG      |  |  | SUCLG1     |
|  | FLG2     |  |  | BZW1       |
|  | FLI1     |  |  | STX10      |
|  | FLII     |  |  | TINF2      |
|  | FLNA     |  |  | TSPYL2     |
|  | FLNB     |  |  | SLC25A23   |
|  | FLNC     |  |  | C11orf96   |
|  | FLOT1    |  |  | LAMC1      |
|  | FLRT2    |  |  | FGD5-AS1   |
|  | FLT1     |  |  | AKAP13     |
|  | FLT4     |  |  | BAHCC1     |
|  | FLVCR2   |  |  | AC069224.2 |
|  | FLYWCH1  |  |  | MGST1      |
|  | FLYWCH2  |  |  | SAA1       |
|  | FMR1     |  |  | RPL13      |
|  | FNBP4    |  |  | AC016831.6 |
|  | FNDC3B   |  |  | USP11      |
|  | FNDC4    |  |  | ALDH1A2    |

Table S6

|  |            |  |            |
|--|------------|--|------------|
|  | FOS        |  | KDM7A      |
|  | FOSB       |  | BCAP31     |
|  | FOSL1      |  | SNORD3C    |
|  | FOXA1      |  | RAB5B      |
|  | FOXD1      |  | MYOM1      |
|  | FOXD3-AS1  |  | SQOR       |
|  | FOXE1      |  | GORAB      |
|  | FOXJ2      |  | THBS1      |
|  | FOXJ3      |  | COPB2      |
|  | FOXK2      |  | INS-IGF2   |
|  | FOXN2      |  | CYBA       |
|  | FOXN3      |  | USH1C      |
|  | FOXO1      |  | OSER1      |
|  | FOXO4      |  | PPARA      |
|  | FOXP4-AS1  |  | RBM33      |
|  | FOXRED1    |  | STK39      |
|  | FOXRED2    |  | C12orf75   |
|  | FP236383.1 |  | EPC2       |
|  | FP236383.9 |  | TACC3      |
|  | FP565260.1 |  | CAP1       |
|  | FP565260.3 |  | SLC40A1    |
|  | FP565260.6 |  | RAN        |
|  | FP671120.2 |  | CKAP4      |
|  | FP671120.6 |  | GPATCH8    |
|  | FPGS       |  | AP000873.2 |
|  | FPR1       |  | MPHOSPH9   |
|  | FREM2      |  | GGH        |
|  | FRMD4A     |  | ACP2       |
|  | FRMD6      |  | BCO1       |
|  | FRMD8      |  | TRAPPC6A   |
|  | FRS2       |  | DNPH1      |
|  | FRYL       |  | RNF114     |
|  | FSCN1      |  | PNPLA2     |
|  | FSIP2      |  | LATS2      |
|  | FSTL3      |  | TPRKB      |
|  | FTH1       |  | SORBS2     |
|  | FTH1P10    |  | SNRK       |
|  | FTH1P11    |  | HOMER1     |
|  | FTH1P12    |  | RHOA       |
|  | FTH1P15    |  | AL590867.2 |
|  | FTH1P16    |  | CARS1      |
|  | FTH1P2     |  | REEP3      |
|  | FTH1P20    |  | IGF2-AS    |
|  | FTH1P23    |  | CD151      |
|  | FTH1P3     |  | MIR22HG    |
|  | FTH1P4     |  | TYW5       |
|  | FTH1P5     |  | LAMB3      |
|  | FTH1P7     |  | RN7SL396P  |
|  | FTH1P8     |  | PROCR      |
|  | FTL        |  | KRT23      |
|  | FTLP3      |  | KIFC1      |
|  | FTO        |  | TTC9B      |
|  | FTSJ3      |  | NHSL2      |
|  | FUBP1      |  | ZNF296     |
|  | FUBP3      |  | NSUN6      |
|  | FUCA1      |  | PPT1       |
|  | FUNDC2     |  | RPL24      |
|  | FURIN      |  | MRPL30     |
|  | FUT1       |  | CEBPA      |
|  | FXR1       |  | MEG9       |

Table S6

|  |            |  |  |             |
|--|------------|--|--|-------------|
|  | FXR2       |  |  | MRPL33      |
|  | FXYD6      |  |  | PELO        |
|  | FYB1       |  |  | PDE5A       |
|  | FYCO1      |  |  | IL18R1      |
|  | FYN        |  |  | MYO5C       |
|  | FYTTD1     |  |  | STC1        |
|  | FZD4       |  |  | AC079594.2  |
|  | FZD8       |  |  | GULP1       |
|  | FZR1       |  |  | LRP8        |
|  | G0S2       |  |  | HIRA        |
|  | G2E3       |  |  | ATXN2L      |
|  | G6PD       |  |  | ZMPSTE24    |
|  | GABARAPL1  |  |  | CD99L2      |
|  | GABARAPL2  |  |  | H1-2        |
|  | GABBR1     |  |  | SKA2        |
|  | GABPB1     |  |  | RPL13A      |
|  | GABPB1-AS1 |  |  | SNHG19      |
|  | GABRA5     |  |  | ITM2C       |
|  | GABRB3     |  |  | SIK3        |
|  | GABRE      |  |  | PIH1D1      |
|  | GABRP      |  |  | ZMIZ2       |
|  | GABRQ      |  |  | MAN1A2      |
|  | GADD45A    |  |  | FAM161A     |
|  | GADD45B    |  |  | NPTX1       |
|  | GADD45G    |  |  | PAK3        |
|  | GADD45GIP1 |  |  | FKBP8       |
|  | GAK        |  |  | SRSF6       |
|  | GAL        |  |  | DHX37       |
|  | GALC       |  |  | KDEL2       |
|  | GALNT1     |  |  | POLK        |
|  | GALNT10    |  |  | ADAMTS1     |
|  | GALNT11    |  |  | UQCR10      |
|  | GALNT18    |  |  | TPM2        |
|  | GALNT2     |  |  | SRD5A3-AS1  |
|  | GALT       |  |  | METTTL7A    |
|  | GAN        |  |  | COL18A1     |
|  | GAPDH      |  |  | GATA3       |
|  | GAPVD1     |  |  | TMEM47      |
|  | GARS-DT    |  |  | RLIM        |
|  | GART       |  |  | IFNA7       |
|  | GAS1       |  |  | ABCC4       |
|  | GAS2L3     |  |  | AC244517.11 |
|  | GAS5       |  |  | NME1        |
|  | GAS6       |  |  | TCEAL4      |
|  | GATA2      |  |  | UBASH3A     |
|  | GATA6      |  |  | HNRNPUL1    |
|  | GATD1      |  |  | ZBTB17      |
|  | GATD3A     |  |  | MED15       |
|  | GBA        |  |  | GHITM       |
|  | GBA2       |  |  | TSKU        |
|  | GBF1       |  |  | NFIX        |
|  | GBGT1      |  |  | NDUFB3      |
|  | GBP1       |  |  | EIF3K       |
|  | GBP1P1     |  |  | CLCN2       |
|  | GBP2       |  |  | PDZK1IP1    |
|  | GBP3       |  |  | SYS1        |
|  | GBP4       |  |  | CMTM6       |
|  | GBP5       |  |  | CDCA2       |
|  | GCA        |  |  | ADAP1       |
|  | GCC1       |  |  | USF3        |

Table S6

|  |        |  |  |            |
|--|--------|--|--|------------|
|  | GCFC2  |  |  | ID1        |
|  | GCH1   |  |  | SLC16A3    |
|  | GCN1   |  |  | MPZL1      |
|  | GCNT2  |  |  | SPA17      |
|  | GCNT3  |  |  | RDX        |
|  | GDE1   |  |  | GSTM3      |
|  | GDF11  |  |  | CAPN5      |
|  | GDF15  |  |  | LST1       |
|  | GDI1   |  |  | TBC1D16    |
|  | GDPD5  |  |  | PLEKHG6    |
|  | GEM    |  |  | SENP5      |
|  | GEMIN2 |  |  | FOPNL      |
|  | GET3   |  |  | CEP250     |
|  | GFER   |  |  | TTC39B     |
|  | GFOD1  |  |  | BTG2       |
|  | GFOD2  |  |  | GSTP1      |
|  | GGA1   |  |  | MRPL51     |
|  | GGA2   |  |  | AJ003147.2 |
|  | GGA3   |  |  | AC005332.6 |
|  | GGH    |  |  | BISPR      |
|  | GGNBP2 |  |  | AC105105.4 |
|  | GID8   |  |  | ABCA5      |
|  | GIGYF1 |  |  | KBTBD8     |
|  | GIMAP5 |  |  | AC092117.1 |
|  | GIPC1  |  |  | DTNA       |
|  | GIT1   |  |  | NELFE      |
|  | GIT2   |  |  | VANGL2     |
|  | GJA4   |  |  | C4orf3     |
|  | GJA5   |  |  | MTFR1      |
|  | GJC1   |  |  | SVIP       |
|  | GK     |  |  | VOPP1      |
|  | GK5    |  |  | SELL       |
|  | GKN2   |  |  | ERG28      |
|  | GLDN   |  |  | EML4       |
|  | GLG1   |  |  | SUDS3      |
|  | GLI3   |  |  | DCAF13     |
|  | GLIPR1 |  |  | BRF2       |
|  | GLMP   |  |  | C11orf24   |
|  | GLOD4  |  |  | CRY2       |
|  | GLRX   |  |  | SSR1       |
|  | GLT8D1 |  |  | ADK        |
|  | GMCL1  |  |  | SEC62      |
|  | GMDS   |  |  | TMED3      |
|  | GMEB2  |  |  | RPL7A      |
|  | GMFG   |  |  | NOD2       |
|  | GMPPA  |  |  | IPO5       |
|  | GMPPB  |  |  | OSGIN1     |
|  | GMPR   |  |  | HMG2P46    |
|  | GMPS   |  |  | ESRP1      |
|  | GNA11  |  |  | FAM214A    |
|  | GNA12  |  |  | KIF2C      |
|  | GNAI3  |  |  | RPA1       |
|  | GNAS   |  |  | RNU11      |
|  | GNB1   |  |  | FNDC3B     |
|  | GNB2   |  |  | COX11      |
|  | GNB4   |  |  | PPARGC1A   |
|  | GNB5   |  |  | EIF2S3     |
|  | GNG11  |  |  | MST1R      |
|  | GNG2   |  |  | SRD5A3     |
|  | GNG5   |  |  | STK17B     |

Table S6

|  |           |  |  |            |
|--|-----------|--|--|------------|
|  | GNG5P2    |  |  | BAZ2A      |
|  | GNL1      |  |  | PARP1      |
|  | GNL2      |  |  | LSMEM1     |
|  | GNL3      |  |  | AC073957.3 |
|  | GNL3L     |  |  | CTSV       |
|  | GNLY      |  |  | H1-6       |
|  | GNPAT     |  |  | DCTN1      |
|  | GNPDA2    |  |  | FAT1       |
|  | GNPNAT1   |  |  | FSIP2      |
|  | GNPTG     |  |  | ABCD1      |
|  | GNS       |  |  | RNF130     |
|  | GOLGA1    |  |  | FAM172A    |
|  | GOLGA2    |  |  | SLC9A3R1   |
|  | GOLGA3    |  |  | KLHDC7B    |
|  | GOLGA4    |  |  | CHMP4B     |
|  | GOLGA6L4  |  |  | MAPK13     |
|  | GOLGA6L5P |  |  | DENR       |
|  | GOLGA6L9  |  |  | SLC7A1     |
|  | GOLGA7    |  |  | CACNA1D    |
|  | GOLGA8A   |  |  | NGRN       |
|  | GOLGA8B   |  |  | F11R       |
|  | GOLGB1    |  |  | CCDC71L    |
|  | GOLM1     |  |  | KNOP1      |
|  | GOLPH3L   |  |  | TMEM106C   |
|  | GON4L     |  |  | TBK1       |
|  | GOT2      |  |  | RAB4A      |
|  | GPAA1     |  |  | PPFIA1     |
|  | GPANK1    |  |  | BAAT       |
|  | GPAT4     |  |  | SLC25A40   |
|  | GPATCH11  |  |  | SAE1       |
|  | GPATCH2   |  |  | AC011466.3 |
|  | GPATCH3   |  |  | BTG1       |
|  | GPATCH4   |  |  | RHBDD3     |
|  | GPATCH8   |  |  | FLCN       |
|  | GPBP1     |  |  | LPIN2      |
|  | GPBP1L1   |  |  | IQCE       |
|  | GPC3      |  |  | ROMO1      |
|  | GPD1      |  |  | DIP2C      |
|  | GPD1L     |  |  | APIP       |
|  | GPD2      |  |  | ATP10D     |
|  | GPKOW     |  |  | CERS6      |
|  | GPLD1     |  |  | APRT       |
|  | GPM6B     |  |  | AZIN2      |
|  | GPN1      |  |  | TRIM36     |
|  | GPN2      |  |  | HNF1B      |
|  | GPN3      |  |  | HLA-DRB6   |
|  | GPNMB     |  |  | AGPAT1     |
|  | GPR107    |  |  | HSPE1      |
|  | GPR108    |  |  | AL049766.1 |
|  | GPR132    |  |  | BAIAP2L2   |
|  | GPR141    |  |  | HINT1      |
|  | GPR155    |  |  | BDNF       |
|  | GPR160    |  |  | SATB2      |
|  | GPR161    |  |  | TBCA       |
|  | GPR180    |  |  | DOCK1      |
|  | GPR37L1   |  |  | TERC       |
|  | GPR65     |  |  | REC8       |
|  | GPR68     |  |  | MXD4       |
|  | GPR84     |  |  | EPHA2      |
|  | GPR89A    |  |  | CAV2       |



Table S6

|  |             |  |  |            |
|--|-------------|--|--|------------|
|  | GPR89B      |  |  | POLR1C     |
|  | GPRC5A      |  |  | BTN2A3P    |
|  | GPRC5B      |  |  | SMC1A      |
|  | GPS1        |  |  | SBF2       |
|  | GPSM3       |  |  | RAD54L     |
|  | GPX1        |  |  | DHRS7      |
|  | GPX2        |  |  | ZNF473     |
|  | GPX4        |  |  | IL6-AS1    |
|  | GRAMD1A     |  |  | IRGM       |
|  | GRASP       |  |  | UBXN2B     |
|  | GRB10       |  |  | HIP1       |
|  | GRB7        |  |  | BMPR2      |
|  | GRHL1       |  |  | AC007991.2 |
|  | GRHPR       |  |  | KCTD3      |
|  | GRIN2D      |  |  | PTGER2     |
|  | GRINA       |  |  | AL360012.1 |
|  | GRK3        |  |  | CUL7       |
|  | GRK5        |  |  | MORF4L2    |
|  | GRPEL2      |  |  | TMEM239    |
|  | GRSF1       |  |  | IL18       |
|  | GRWD1       |  |  | MAML3      |
|  | GS1-358P8.4 |  |  | SEMA6A     |
|  | GSAP        |  |  | RPS7       |
|  | GSDMD       |  |  | PAGR1      |
|  | GSDME       |  |  | CC2D1B     |
|  | GSK3A       |  |  | INTS6L     |
|  | GSN         |  |  | FOCAD      |
|  | GSN-AS1     |  |  | PSRC1      |
|  | GSR         |  |  | PSMD3      |
|  | GSS         |  |  | CPNE3      |
|  | GSTA4       |  |  | RNF216     |
|  | GSTM3       |  |  | SNX12      |
|  | GSTO1       |  |  | CHRDL1     |
|  | GSTP1       |  |  | ATPCKMT    |
|  | GSTT2B      |  |  | EVPL       |
|  | GTDC1       |  |  | RASD1      |
|  | GTF2B       |  |  | CSAG3      |
|  | GTF2F1      |  |  | AL031777.1 |
|  | GTF2H1      |  |  | MAU2       |
|  | GTF2H2      |  |  | TOMM40L    |
|  | GTF2H2B     |  |  | ERO1B      |
|  | GTF2H2C     |  |  | MICU1      |
|  | GTF2I       |  |  | HMG5       |
|  | GTF2IP1     |  |  | GTF2F1     |
|  | GTF2IP13    |  |  | SCAMP1-AS1 |
|  | GTF2IP4     |  |  | TNFRSF12A  |
|  | GTF2IP7     |  |  | TNFRSF11B  |
|  | GTF3C1      |  |  | MAP3K10    |
|  | GTF3C3      |  |  | ARL3       |
|  | GTF3C5      |  |  | BTBD19     |
|  | GTPBP1      |  |  | CYFIP1     |
|  | GTPBP10     |  |  | HMG1       |
|  | GTPBP2      |  |  | OSTM1      |
|  | GTPBP4      |  |  | MOB3B      |
|  | GTPBP6      |  |  | MCM2       |
|  | GTPBP8      |  |  | COX17      |
|  | GUCD1       |  |  | NAA60      |
|  | GUCY1A2     |  |  | SEMA4G     |
|  | GUF1        |  |  | HPRT1      |
|  | GUK1        |  |  | NHP2       |

Table S6

|  |         |  |            |
|--|---------|--|------------|
|  | GUSB    |  | RPL12      |
|  | GYG1    |  | WNT7B      |
|  | GYPC    |  | FZD5       |
|  | GYS1    |  | LINC02100  |
|  | H1-0    |  | TAOK3      |
|  | H1-10   |  | TTK        |
|  | H19     |  | DTX4       |
|  | H2AC11  |  | POC5       |
|  | H2AC18  |  | ZNF79      |
|  | H2AC19  |  | DLX2       |
|  | H2AC20  |  | RGS20      |
|  | H2AC6   |  | SMAD5      |
|  | H2AC7   |  | STIP1      |
|  | H2AJ    |  | AC006042.2 |
|  | H2AX    |  | MIS18BP1   |
|  | H2BC12  |  | STX3       |
|  | H2BC18  |  | SRP14      |
|  | H2BC21  |  | DNAJB5     |
|  | H2BC4   |  | MTCH2      |
|  | H2BC5   |  | SMAD2      |
|  | H2BP1   |  | AC104073.1 |
|  | H2BU1   |  | SLC25A1    |
|  | H3-3A   |  | PALM3      |
|  | H3-3B   |  | AC104532.1 |
|  | H3-5    |  | PKD2       |
|  | H3C10   |  | HID1       |
|  | H3C4    |  | NAPSB      |
|  | H3P14   |  | USP30-AS1  |
|  | H3P16   |  | PRDX1      |
|  | H3P36   |  | MTPN       |
|  | H3P6    |  | SRSF7      |
|  | H4C14   |  | NDUFA1     |
|  | H4C15   |  | ZBTB44     |
|  | H4C9    |  | COG3       |
|  | HABP4   |  | LAMB1      |
|  | HACD2   |  | NFKBIB     |
|  | HACD3   |  | APAF1      |
|  | HACL1   |  | WDR24      |
|  | HAGH    |  | WSB2       |
|  | HAPLN3  |  | PIK3C2B    |
|  | HARS1   |  | ACAT1      |
|  | HARS2   |  | ZNF75A     |
|  | HAS2    |  | NACC2      |
|  | HAT1    |  | NT5DC1     |
|  | HAUS2   |  | AC068860.1 |
|  | HAVCR1  |  | RN7SKP71   |
|  | HBA1    |  | SYCP2      |
|  | HBA2    |  | NDUFB5     |
|  | HBEGF   |  | IPO11      |
|  | HBP1    |  | MYO5A      |
|  | HBS1L   |  | MBTD1      |
|  | HCAR1   |  | HNRNPM     |
|  | HCAR2   |  | RRAD       |
|  | HCFC1R1 |  | ZMYND11    |
|  | HCG18   |  | CBX1       |
|  | HCK     |  | USP42      |
|  | HCLS1   |  | OGFRL1     |
|  | HCST    |  | WDR54      |
|  | HDAC11  |  | VDR        |
|  | HDAC3   |  | TXNDC12    |

Table S6

|  |           |  |  |            |
|--|-----------|--|--|------------|
|  | HDAC4     |  |  | SACS       |
|  | HDAC5     |  |  | MTCO1P11   |
|  | HDAC6     |  |  | AC022149.1 |
|  | HDAC7     |  |  | C11orf68   |
|  | HDGF      |  |  | AC005062.1 |
|  | HDHD2     |  |  | KIAA0355   |
|  | HDHD5     |  |  | HMGB1P6    |
|  | HDLBP     |  |  | NDUFB1     |
|  | HEATR3    |  |  | AC078802.2 |
|  | HECA      |  |  | SLC2A4RG   |
|  | HECTD1    |  |  | SMARCA2    |
|  | HECTD3    |  |  | ATAD2B     |
|  | HECTD4    |  |  | STYK1      |
|  | HELB      |  |  | C1orf61    |
|  | HELLS     |  |  | SPTBN2     |
|  | HELZ      |  |  | TINAG      |
|  | HELZ2     |  |  | ZNF672     |
|  | HERC1     |  |  | MMP1       |
|  | HERC2     |  |  | TASOR      |
|  | HERC2P2   |  |  | TNFRSF19   |
|  | HERC2P9   |  |  | SLC2A6     |
|  | HERC3     |  |  | RYK        |
|  | HERC5     |  |  | AC004130.2 |
|  | HERC6     |  |  | GUK1       |
|  | HERPUD1   |  |  | HS3ST1     |
|  | HES1      |  |  | MYLIP      |
|  | HES2      |  |  | GNL3L      |
|  | HES7      |  |  | AF279873.2 |
|  | HESX1     |  |  | LYRM7      |
|  | HEXA      |  |  | FADS2      |
|  | HEXB      |  |  | DRAM1      |
|  | HEXIM1    |  |  | BMPR1B     |
|  | HEYL      |  |  | WHAMM      |
|  | HGD       |  |  | COTL1      |
|  | HGH1      |  |  | ARRB2      |
|  | HGS       |  |  | AL021707.3 |
|  | HHLA1     |  |  | H2BC19P    |
|  | HHLA2     |  |  | THAP12     |
|  | HID1      |  |  | OS9        |
|  | HIF1A-AS1 |  |  | LY75-CD302 |
|  | HIF1AN    |  |  | AC011287.1 |
|  | HIGD2A    |  |  | SRPK1      |
|  | HIKESHI   |  |  | GPD1L      |
|  | HILPDA    |  |  | AC110079.1 |
|  | HINFP     |  |  | PRMT5      |
|  | HINT3     |  |  | NECAP2     |
|  | HIP1R     |  |  | CFI        |
|  | HIPK1     |  |  | SNORA79B   |
|  | HIPK2     |  |  | TRIQK      |
|  | HIPK3     |  |  | PDZD8      |
|  | HIRA      |  |  | NR2F2      |
|  | HIRIP3    |  |  | SERPINH1   |
|  | HIST2H2BC |  |  | SAV1       |
|  | HK1       |  |  | SART3      |
|  | HLA-A     |  |  | CASC4      |
|  | HLA-B     |  |  | PCCB       |
|  | HLA-DOB   |  |  | PKM        |
|  | HLA-DPA1  |  |  | FAF2       |
|  | HLA-DPB1  |  |  | SNORD3D    |
|  | HLA-DQA1  |  |  | SNORD3D    |

Table S6

|  |                |  |  |            |
|--|----------------|--|--|------------|
|  | HLA-DQB1       |  |  | ADAM28     |
|  | HLA-DRB1       |  |  | GPX8       |
|  | HLA-DRB5       |  |  | UTP6       |
|  | HLA-H          |  |  | NBPF10     |
|  | HLA-L          |  |  | AC092153.1 |
|  | HLCS           |  |  | HIGD1A     |
|  | HLTF           |  |  | ATP4A      |
|  | HLX            |  |  | VASP       |
|  | HM13           |  |  | TECR       |
|  | HMBOX1         |  |  | ZRSR2P1    |
|  | HMCES          |  |  | ST6GAL1    |
|  | HMG20B         |  |  | TCF3       |
|  | HMGB1P6        |  |  | PCBP1-AS1  |
|  | HMGB2          |  |  | UBOX5      |
|  | HMGCS1         |  |  | C16orf58   |
|  | HMGN2          |  |  | IFT27      |
|  | HMGN3          |  |  | WDR1       |
|  | HMGXB3         |  |  | CSE1L      |
|  | HMOX1          |  |  | ACTR1B     |
|  | HMOX2          |  |  | LMNA       |
|  | HNF1A          |  |  | ARAP3      |
|  | HNF4G          |  |  | KLHL20     |
|  | HNRNPA0        |  |  | CXCL16     |
|  | HNRNPA1        |  |  | PPP1R7     |
|  | HNRNPA1P48     |  |  | SGSM2      |
|  | HNRNPA1P7      |  |  | SPIN1      |
|  | HNRNPA2B1      |  |  | PPM1H      |
|  | HNRNPA3P6      |  |  | HNRNPH2    |
|  | HNRNPAB        |  |  | DBF4B      |
|  | HNRNPC         |  |  | INTS13     |
|  | HNRNPD         |  |  | RELT       |
|  | HNRNPDL        |  |  | DLD        |
|  | HNRNPH1        |  |  | SNORA7B    |
|  | HNRNPH3        |  |  | MYSM1      |
|  | HNRNPK         |  |  | IFT57      |
|  | HNRNPL         |  |  | VPS26B     |
|  | HNRNPLL        |  |  | PSIP1      |
|  | HNRNPM         |  |  | PGM2       |
|  | HNRNPR         |  |  | C7orf31    |
|  | HNRNPUL1       |  |  | NUF2       |
|  | HNRNPUL2       |  |  | FER1L4     |
|  | HNRNPUL2-BSCL2 |  |  | SH3RF1     |
|  | HOMER3         |  |  | PLD1       |
|  | HOOK2          |  |  | RPL30      |
|  | HOOK3          |  |  | CNOT4      |
|  | HOPX           |  |  | ESD        |
|  | HOTAIRM1       |  |  | MAFB       |
|  | HOXA5          |  |  | RPL24P4    |
|  | HOXC10         |  |  | IMPAD1     |
|  | HOXC13         |  |  | COX6B1     |
|  | HP             |  |  | ZNF436     |
|  | HPCAL1         |  |  | CYTH1      |
|  | HPF1           |  |  | CDKN2A     |
|  | HPGDS          |  |  | ZNF646     |
|  | HPR            |  |  | CACNA1I    |
|  | HPRT1          |  |  | MYH14      |
|  | HPS3           |  |  | COL4A1     |
|  | HPS4           |  |  | SLMAP      |
|  | HPSE           |  |  | FSTL3      |
|  | HRAS           |  |  | NRAS       |

Table S6

|  |           |  |  |            |
|--|-----------|--|--|------------|
|  | HS1BP3    |  |  | PCF11-AS1  |
|  | HS2ST1    |  |  | WDR25      |
|  | HS3ST3A1  |  |  | RHOB       |
|  | HS6ST1    |  |  | IP6K1      |
|  | HS6ST1P1  |  |  | PISD       |
|  | HSBP1     |  |  | CRIM1      |
|  | HSD17B10  |  |  | CIB1       |
|  | HSD17B13  |  |  | TMEM171    |
|  | HSD17B7   |  |  | DCHS1      |
|  | HSD17B8   |  |  | TSPAN3     |
|  | HSDL1     |  |  | HSPG2      |
|  | HSF1      |  |  | RPS15A     |
|  | HSH2D     |  |  | TSTD1      |
|  | HSP90AB1  |  |  | TLE4       |
|  | HSP90AB3P |  |  | CCT7       |
|  | HSPA12A   |  |  | MED18      |
|  | HSPA12B   |  |  | BUB3       |
|  | HSPA1B    |  |  | RNF31      |
|  | HSPA2     |  |  | RC3H1      |
|  | HSPA4     |  |  | BCL9L      |
|  | HSPA4L    |  |  | PITPNM1    |
|  | HSPA5     |  |  | NUP155     |
|  | HSPA6     |  |  | TMEM237    |
|  | HSPA7     |  |  | AC009220.1 |
|  | HSPA8     |  |  | PACSIN2    |
|  | HSPB6     |  |  | ANKRD11    |
|  | HSPB7     |  |  | RGL2       |
|  | HSPB8     |  |  | EFHC1      |
|  | HSPD1     |  |  | CLTC       |
|  | HSPG2     |  |  | SLC6A9     |
|  | HSPH1     |  |  | LINC01184  |
|  | HTATIP2   |  |  | VKORC1     |
|  | HTATSF1   |  |  | CCL3       |
|  | HTRA1     |  |  | LGALS8     |
|  | HTRA2     |  |  | SMOC1      |
|  | HTRA3     |  |  | GNAI2      |
|  | HTT       |  |  | NDUFB2     |
|  | HUS1      |  |  | NARS1      |
|  | HYAL1     |  |  | CPVL       |
|  | HYAL2     |  |  | MGAT5      |
|  | HYI       |  |  | KLF7       |
|  | HYKK      |  |  | LRCH1      |
|  | HYOU1     |  |  | SLC4A4     |
|  | IARS2     |  |  | MYADM      |
|  | IBTK      |  |  | AC087239.1 |
|  | ICA1      |  |  | IGSF8      |
|  | ICAM1     |  |  | MAGI1      |
|  | ICAM2     |  |  | GALNT11    |
|  | ICE1      |  |  | MRPS27     |
|  | ICOSLG    |  |  | BRD4       |
|  | ID1       |  |  | STAP2      |
|  | ID2       |  |  | CTPS2      |
|  | ID3       |  |  | NDUFA2     |
|  | ID4       |  |  | PPA2       |
|  | IDH2      |  |  | NSRP1      |
|  | IDH3A     |  |  | NCAPG2     |
|  | IDO1      |  |  | CLK3       |
|  | IER2      |  |  | PLK2       |
|  | IER3      |  |  | ARID1A     |
|  | IER5L     |  |  | ASH1L      |

Table S6

|  |           |  |  |            |
|--|-----------|--|--|------------|
|  | IFFO1     |  |  | NFKBIL1    |
|  | IFFO2     |  |  | MED24      |
|  | IFI16     |  |  | GCC1       |
|  | IFI27L1   |  |  | BTAF1      |
|  | IFI27L2   |  |  | C16orf70   |
|  | IFI44     |  |  | ADD1       |
|  | IFI44L    |  |  | MAP3K21    |
|  | IFI6      |  |  | VWA2       |
|  | IFIH1     |  |  | RINT1      |
|  | IFIT1     |  |  | NDE1       |
|  | IFIT2     |  |  | STAT4      |
|  | IFIT3     |  |  | LINC02032  |
|  | IFIT5     |  |  | CENPE      |
|  | IFITM1    |  |  | GET1       |
|  | IFITM10   |  |  | SLC4A7     |
|  | IFITM2    |  |  | SAMM50     |
|  | IFITM3    |  |  | ELL2       |
|  | IFNAR2    |  |  | SERTAD2    |
|  | IFNGR1    |  |  | POFUT1     |
|  | IFNGR2    |  |  | TMCO3      |
|  | IFRD2     |  |  | ZNF543     |
|  | IFT172    |  |  | HNRNPA1    |
|  | IFT43     |  |  | AC022966.1 |
|  | IFT46     |  |  | AC011939.1 |
|  | IFT57     |  |  | SZT2       |
|  | IGF1R     |  |  | B3GALNT1   |
|  | IGF2BP1   |  |  | PHTF2      |
|  | IGF2R     |  |  | AC010168.2 |
|  | IGFBP1    |  |  | NADK       |
|  | IGFBP2    |  |  | CEP192     |
|  | IGFBP3    |  |  | AC099343.4 |
|  | IGFBP6    |  |  | ZNF707     |
|  | IGFL1     |  |  | MMP7       |
|  | IGFL2-AS1 |  |  | CRYZL2P    |
|  | IGFL4     |  |  | NBPF14     |
|  | IGFLR1    |  |  | ABCC9      |
|  | IGHMBP2   |  |  | MUC4       |
|  | IGIP      |  |  | MTMR12     |
|  | IGSF22    |  |  | ALDH18A1   |
|  | IGSF3     |  |  | NAALADL1   |
|  | IGSF6     |  |  | APBA3      |
|  | IK        |  |  | FBXO9      |
|  | IKBKB     |  |  | AC009093.4 |
|  | IKBKGP1   |  |  | AC132192.2 |
|  | IL10RB-DT |  |  | RWDD1      |
|  | IL11      |  |  | N4BP3      |
|  | IL11RA    |  |  | GK5        |
|  | IL12RB2   |  |  | ZNF318     |
|  | IL13RA1   |  |  | PKHD1L1    |
|  | IL15      |  |  | MYRF       |
|  | IL15RA    |  |  | TRAF7      |
|  | IL17C     |  |  | BEX3       |
|  | IL18BP    |  |  | CCT6P1     |
|  | IL18RAP   |  |  | AC006458.1 |
|  | IL1A      |  |  | USF2       |
|  | IL1B      |  |  | CCDC85B    |
|  | IL1R1     |  |  | PHLDB3     |
|  | IL1R2     |  |  | MFSD1      |
|  | IL1RL1    |  |  | HIVEP1     |
|  | IL1RN     |  |  | DCAF7      |

Table S6

|  |          |  |  |            |
|--|----------|--|--|------------|
|  | IL27RA   |  |  | SMAD3      |
|  | IL2RG    |  |  | RPL21      |
|  | IL3RA    |  |  | AC116407.2 |
|  | IL4R     |  |  | RSAD1      |
|  | IL6ST    |  |  | LRRC45     |
|  | ILF3     |  |  | ILVBL      |
|  | ILF3-DT  |  |  | PFDN5      |
|  | ILKAP    |  |  | USP53      |
|  | ILRUN    |  |  | SRSF1      |
|  | ILVBL    |  |  | CKLF       |
|  | IMMT     |  |  | SIPA1L1    |
|  | IMP3     |  |  | GADD45A    |
|  | IMP4     |  |  | ZSCAN32    |
|  | IMPAD1   |  |  | UVRAG      |
|  | IMPDH1   |  |  | MAP1LC3B   |
|  | IMPDH2   |  |  | PYGL       |
|  | INA      |  |  | ELOB       |
|  | INAFM1   |  |  | ARL1       |
|  | INF2     |  |  | KALRN      |
|  | ING2     |  |  | SLC8A2     |
|  | ING3     |  |  | CLIC1      |
|  | ING4     |  |  | NSD2       |
|  | ING5     |  |  | NLN        |
|  | INHBB    |  |  | RPL9       |
|  | INIP     |  |  | LINC02328  |
|  | INKA2    |  |  | TPI1P1     |
|  | INMT     |  |  | PRTFDC1    |
|  | INO80    |  |  | CLIP4      |
|  | INO80D   |  |  | C2         |
|  | INO80E   |  |  | NSA2       |
|  | INPP1    |  |  | PRRC2A     |
|  | INPP4A   |  |  | FAM162A    |
|  | INPP5A   |  |  | TRAF2      |
|  | INPP5K   |  |  | NSUN4      |
|  | INSIG1   |  |  | IL6ST      |
|  | INSIG2   |  |  | LRP1       |
|  | INSR     |  |  | GALNT5     |
|  | INSYN2B  |  |  | PLA1A      |
|  | INTS1    |  |  | NEDD8-MDP1 |
|  | INTS10   |  |  | EGLN3      |
|  | INTS11   |  |  | ZNF324     |
|  | INTS12   |  |  | SCARNA16   |
|  | INTS13   |  |  | GCNT2      |
|  | INTS3    |  |  | ADI1       |
|  | INTS5    |  |  | SLCO3A1    |
|  | INTS6L   |  |  | KDM3B      |
|  | INTS7    |  |  | TMEM165    |
|  | IP6K1    |  |  | KCNMB4     |
|  | IP6K2    |  |  | IER5L      |
|  | IPO5     |  |  | TXNRD1     |
|  | IPO8     |  |  | ERBB4      |
|  | IQCA1    |  |  | DPY19L4    |
|  | IQCB1    |  |  | CLDN23     |
|  | IQCE     |  |  | SNRPG      |
|  | IQGAP1   |  |  | LIN54      |
|  | IQUB     |  |  | NOP2       |
|  | IRAK3    |  |  | CIC        |
|  | IRF1-AS1 |  |  | SYNJ1      |
|  | IRF2     |  |  | HSDL2      |
|  | IRF2BP1  |  |  | PITX1      |

Table S6

|  |            |  |  |            |
|--|------------|--|--|------------|
|  | IRF2BPL    |  |  | SPATA6L    |
|  | IRF5       |  |  | COX20      |
|  | IRF7       |  |  | RNVU1-14   |
|  | IRF9       |  |  | SAMD4B     |
|  | IRGQ       |  |  | KANSL2     |
|  | IRS2       |  |  | DEDD2      |
|  | IRX3       |  |  | AC010967.1 |
|  | ISCA1      |  |  | SPCS3      |
|  | ISCU       |  |  | AL356234.1 |
|  | ISG15      |  |  | TMEM170B   |
|  | ISG20L2    |  |  | MGST2      |
|  | ISOC2      |  |  | PHB        |
|  | IST1       |  |  | LIMS1      |
|  | ISY1       |  |  | AC009133.1 |
|  | ISYNA1     |  |  | LTA        |
|  | ITCH       |  |  | CACTIN     |
|  | ITGA10     |  |  | ARPC3      |
|  | ITGA2      |  |  | ZNF106     |
|  | ITGA3      |  |  | BSG        |
|  | ITGA5      |  |  | SOX9       |
|  | ITGA7      |  |  | MYO3B      |
|  | ITGAE      |  |  | KDM5B      |
|  | ITGAM      |  |  | PPP1CC     |
|  | ITGAX      |  |  | UNC45A     |
|  | ITGB1BP1   |  |  | CCT5       |
|  | ITGB2-AS1  |  |  | ZNF619     |
|  | ITGB3      |  |  | LACTB2     |
|  | ITGB3BP    |  |  | DOCK11     |
|  | ITGB4      |  |  | HOOK3      |
|  | ITM2A      |  |  | AGPAT5     |
|  | ITM2C      |  |  | DNAJB9     |
|  | ITPA       |  |  | ECHDC1     |
|  | ITPKB      |  |  | PCYOX1L    |
|  | ITPKC      |  |  | DDX6       |
|  | ITPR1      |  |  | SYK        |
|  | ITPR3      |  |  | MFF        |
|  | ITPRID2    |  |  | KIDINS220  |
|  | ITPRIP     |  |  | RALGAPA1   |
|  | ITSN1      |  |  | CSF3       |
|  | IVD        |  |  | IKZF2      |
|  | IVL        |  |  | AL592437.2 |
|  | IVNS1ABP   |  |  | TDP2       |
|  | IWS1       |  |  | AC093510.1 |
|  | IYD        |  |  | CHD6       |
|  | JADE1      |  |  | BAK1       |
|  | JAG1       |  |  | SLC2A12    |
|  | JAG2       |  |  | FBXW2      |
|  | JAK2       |  |  | THSD7A     |
|  | JAK3       |  |  | AP000640.2 |
|  | JAM3       |  |  | VEPH1      |
|  | JCAD       |  |  | NDUFS5     |
|  | JMJD1C     |  |  | SPOP       |
|  | JMJD1C-AS1 |  |  | ZNF14      |
|  | JMJD6      |  |  | DGKH       |
|  | JMY        |  |  | TRMT112    |
|  | JOSD1      |  |  | PLA2G6     |
|  | JOSD2      |  |  | UGP2       |
|  | JPT1       |  |  | NTN4       |
|  | JPX        |  |  | AL353795.3 |
|  | JUN        |  |  | S100A13    |



Table S6

|  |           |  |  |           |
|--|-----------|--|--|-----------|
|  | JUNB      |  |  | MIEN1     |
|  | JUND      |  |  | PDE10A    |
|  | KALRN     |  |  | GADD45G   |
|  | KANK2     |  |  | CUEDC2    |
|  | KANK3     |  |  | PPP1R18   |
|  | KANSL1    |  |  | NRP1      |
|  | KANSL2    |  |  | SETD7     |
|  | KANSL3    |  |  | MIR1291   |
|  | KARS1     |  |  | DCTPP1    |
|  | KAT2A     |  |  | PMS2      |
|  | KAT5      |  |  | SLC41A2   |
|  | KAT8      |  |  | KLHL24    |
|  | KATNB1    |  |  | GTF2IP13  |
|  | KATNBL1   |  |  | CSRNP2    |
|  | KAZN      |  |  | TTC19     |
|  | KBTBD11   |  |  | MZT2B     |
|  | KBTBD2    |  |  | SCNN1A    |
|  | KCMF1     |  |  | SIRPB2    |
|  | KCNAB2    |  |  | HMCE5     |
|  | KCNAB3    |  |  | STX11     |
|  | KCNC4     |  |  | TCTN1     |
|  | KCND1     |  |  | PLB1      |
|  | KCNE1     |  |  | SLC16A5   |
|  | KCNE1B    |  |  | UGT1A6    |
|  | KCNE4     |  |  | SEH1L     |
|  | KCNJ2     |  |  | HSD17B11  |
|  | KCNJ2-AS1 |  |  | MATN2     |
|  | KCNK1     |  |  | CDK18     |
|  | KCNK3     |  |  | RPL35     |
|  | KCNK5     |  |  | CDC42EP3  |
|  | KCNMA1    |  |  | GMPS      |
|  | KCNQ3     |  |  | ZFAND2A   |
|  | KCNS3     |  |  | IER3IP1   |
|  | KCTD10    |  |  | IQCK      |
|  | KCTD11    |  |  | ADAMTS9   |
|  | KCTD12    |  |  | SGK1      |
|  | KCTD15    |  |  | NDRG2     |
|  | KCTD17    |  |  | KDM1A     |
|  | KCTD18    |  |  | PHF3      |
|  | KCTD2     |  |  | MME       |
|  | KCTD20    |  |  | CETN3     |
|  | KCTD3     |  |  | DPP4      |
|  | KCTD5     |  |  | WDHD1     |
|  | KCTD7     |  |  | TMTC3     |
|  | KDELR1    |  |  | LANCL1    |
|  | KDELR3    |  |  | VWA1      |
|  | KDM1A     |  |  | SPAG16    |
|  | KDM2A     |  |  | EIF3A     |
|  | KDM3A     |  |  | LINC00886 |
|  | KDM3B     |  |  | DCP2      |
|  | KDM4C     |  |  | ATP2B1    |
|  | KDM5C     |  |  | SLC52A2   |
|  | KDM6B     |  |  | ARL4D     |
|  | KDSR      |  |  | UBA6      |
|  | KEAP1     |  |  | ARMC1     |
|  | KHDRBS1   |  |  | IL17RB    |
|  | KHDRBS3   |  |  | TRIM52    |
|  | KHNYN     |  |  | DENND4C   |
|  | KHSRP     |  |  | NDUFA13   |
|  | KIAA0100  |  |  | SUCLG2    |

Table S6

|           |  |  |            |
|-----------|--|--|------------|
| KIAA0355  |  |  | ISG20L2    |
| KIAA0513  |  |  | CDH1       |
| KIAA0556  |  |  | MRPS35     |
| KIAA0895L |  |  | EYA1       |
| KIAA0930  |  |  | MTMR3      |
| KIAA1217  |  |  | CNIH4      |
| KIAA1324  |  |  | PROX1      |
| KIAA1328  |  |  | RBPJL      |
| KIAA1522  |  |  | RPL3L      |
| KIAA1671  |  |  | UBE2E3     |
| KIF14     |  |  | RSPRY1     |
| KIF18B    |  |  | IFNGR2     |
| KIF1C     |  |  | YOD1       |
| KIF21B    |  |  | CFAP36     |
| KIF22     |  |  | MRFAP1     |
| KIF23     |  |  | MDH2       |
| KIF3A     |  |  | RPP38      |
| KIF3B     |  |  | RBMS1      |
| KIF5B     |  |  | HEBP2      |
| KIF9-AS1  |  |  | ZNF184     |
| KIFBP     |  |  | PIGN       |
| KIFC2     |  |  | SUGT1P1    |
| KIFC3     |  |  | TBCD       |
| KIRREL1   |  |  | PTPN18     |
| KIZ       |  |  | BAIAP2-DT  |
| KLC1      |  |  | MTCH1      |
| KLC4      |  |  | ARSB       |
| KLF10     |  |  | GOLGA2P10  |
| KLF11     |  |  | RBMX       |
| KLF12     |  |  | STK26      |
| KLF13     |  |  | AC002059.3 |
| KLF4      |  |  | PRR15L     |
| KLF6      |  |  | MATR3      |
| KLF7      |  |  | VEZF1      |
| KLF9      |  |  | IFNW1      |
| KLHDC2    |  |  | KDM5C      |
| KLHDC3    |  |  | H6PD       |
| KLHDC4    |  |  | GTPBP4     |
| KLHDC7B   |  |  | RAB6A      |
| KLHL21    |  |  | ZNF618     |
| KLHL22    |  |  | AC018521.1 |
| KLHL23    |  |  | PPP2R1A    |
| KLHL24    |  |  | RETREG2    |
| KLHL25    |  |  | ZNF746     |
| KLHL3     |  |  | TESC       |
| KLHL36    |  |  | ALDH4A1    |
| KLHL42    |  |  | HSPA1B     |
| KLHL9     |  |  | DDX18      |
| KLK8      |  |  | IMPACT     |
| KLRC2     |  |  | PCK2       |
| KMT2A     |  |  | SGPL1      |
| KMT2B     |  |  | AGFG2      |
| KMT2E     |  |  | AL671883.2 |
| KMT5A     |  |  | AC020978.5 |
| KMT5B     |  |  | AC021205.1 |
| KPNA2     |  |  | LAMB2      |
| KPNA5     |  |  | HOXB7      |
| KPNA6     |  |  | ELOVL7     |
| KPNB1     |  |  | YTHDC1     |
| KPRP      |  |  | SHCBP1     |

Table S6

|  |             |  |  |               |
|--|-------------|--|--|---------------|
|  | KRBOX4      |  |  | DHX15         |
|  | KREMEN2     |  |  | CNKSR3        |
|  | KRI1        |  |  | TIMM23B-AGAP6 |
|  | KRIT1       |  |  | LXN           |
|  | KRR1        |  |  | PNPO          |
|  | KRT15       |  |  | TMEM135       |
|  | KRT16P1     |  |  | NDUFA6        |
|  | KRT16P2     |  |  | RRBP1         |
|  | KRT17       |  |  | TFDP2         |
|  | KRT17P6     |  |  | AC020915.1    |
|  | KRT18       |  |  | TXLNA         |
|  | KRT19       |  |  | ADGRF1        |
|  | KRT23       |  |  | MIGA1         |
|  | KRT31       |  |  | LRIG3         |
|  | KRT42P      |  |  | DPF2          |
|  | KRT81       |  |  | YTHDF1        |
|  | KSR1        |  |  | FLT3LG        |
|  | KTI12       |  |  | MIR1248       |
|  | KXD1        |  |  | ZFAND5        |
|  | KYNU        |  |  | AMOT          |
|  | L1CAM       |  |  | SLC35F5       |
|  | L2HGDH      |  |  | IDS           |
|  | L3HYPDH     |  |  | NDUFA5        |
|  | L3MBTL2     |  |  | WDR34         |
|  | L3MBTL3     |  |  | PRDX4         |
|  | LACC1       |  |  | UBL5          |
|  | LAGE3       |  |  | RNF25         |
|  | LAMA2       |  |  | TBCB          |
|  | LAMA4       |  |  | GRIPAP1       |
|  | LAMB1       |  |  | AC007728.2    |
|  | LAMB2       |  |  | PLOD3         |
|  | LAMC3       |  |  | MATR3         |
|  | LAMP2       |  |  | GAPDH         |
|  | LAMP3       |  |  | PFDN4         |
|  | LAMTOR1     |  |  | SLC39A6       |
|  | LAMTOR2     |  |  | SNORA2C       |
|  | LAMTOR4     |  |  | TRMT13        |
|  | LAMTOR5     |  |  | CENPW         |
|  | LAMTOR5-AS1 |  |  | CSF2          |
|  | LANCL3      |  |  | ACSM3         |
|  | LAPTM4A     |  |  | ARHGEF2       |
|  | LAPTM5      |  |  | TSPAN15       |
|  | LARGE1      |  |  | DNAJC8        |
|  | LARP1       |  |  | RPL4          |
|  | LARP1B      |  |  | NPC1          |
|  | LARP4       |  |  | INCENP        |
|  | LARP4B      |  |  | GOLPH3L       |
|  | LARP6       |  |  | CXorf38       |
|  | LAS1L       |  |  | ZNF408        |
|  | LASP1       |  |  | PRDM1         |
|  | LAYN        |  |  | LTA4H         |
|  | LBH         |  |  | NACA          |
|  | LBR         |  |  | AL021155.5    |
|  | LCAT        |  |  | EIF2AK2       |
|  | LCE1C       |  |  | GBP6          |
|  | LCN2        |  |  | RAB27B        |
|  | LCP1        |  |  | LIMCH1        |
|  | LCP2        |  |  | PHF6          |
|  | LDB1        |  |  | CDC27         |
|  | LDHA        |  |  | MARK3         |

Table S6

|  |           |  |              |
|--|-----------|--|--------------|
|  | LDHAP4    |  | SESTD1       |
|  | LDHAP7    |  | AC022916.2   |
|  | LDLR      |  | PHGDH        |
|  | LDLRAD3   |  | CNOT7        |
|  | LDLRAP1   |  | BCLAF1       |
|  | LENG1     |  | SLC31A2      |
|  | LENG8     |  | S100P        |
|  | LEPROTL1  |  | KLHDC2       |
|  | LERFS     |  | EXOC3L1      |
|  | LETM1     |  | TPRA1        |
|  | LFNG      |  | PON1         |
|  | LGALS1    |  | DDX3X        |
|  | LGALS3    |  | TULP4        |
|  | LGALS3BP  |  | OFD1         |
|  | LGALS9    |  | TBC1D8B      |
|  | LGALS9B   |  | OSTC         |
|  | LGALS9C   |  | STAU2        |
|  | LGI4      |  | IMPDH2       |
|  | LGMN      |  | LINC01004    |
|  | LGR4      |  | ZNF335       |
|  | LHFPL6    |  | ZFHX2        |
|  | LIF       |  | RFPL1        |
|  | LIFR      |  | GNA13        |
|  | LILRA6    |  | EGR4         |
|  | LILRB2    |  | GUCY1B1      |
|  | LILRB3    |  | RNU5F-1      |
|  | LILRB5    |  | ARFGEF3      |
|  | LIMA1     |  | CALM3        |
|  | LIN54     |  | COX8A        |
|  | LINC00243 |  | GPATCH4      |
|  | LINC00312 |  | CEACAMP10    |
|  | LINC00342 |  | RNU6-531P    |
|  | LINC00470 |  | HROB         |
|  | LINC00504 |  | ING3         |
|  | LINC00539 |  | UQCRHL       |
|  | LINC00589 |  | ALDH3B1      |
|  | LINC00605 |  | EXOC5        |
|  | LINC00623 |  | NEU4         |
|  | LINC00641 |  | AC108134.2   |
|  | LINC00649 |  | EHBP1L1      |
|  | LINC00665 |  | TMEM268      |
|  | LINC00667 |  | DDX56        |
|  | LINC00907 |  | CDK19        |
|  | LINC00908 |  | RHOBTB1      |
|  | LINC00923 |  | RPL13AP5     |
|  | LINC00937 |  | FNIP2        |
|  | LINC00958 |  | ATXN10       |
|  | LINC01001 |  | AKAP11       |
|  | LINC01002 |  | E2F3         |
|  | LINC01126 |  | TTBK2        |
|  | LINC01128 |  | EPPK1        |
|  | LINC01136 |  | RNF103-CHMP3 |
|  | LINC01138 |  | RCAN3        |
|  | LINC01145 |  | KCTD20       |
|  | LINC01234 |  | AL645941.2   |
|  | LINC01270 |  | UBR2         |
|  | LINC01278 |  | EIF4E3       |
|  | LINC01303 |  | PTPRJ        |
|  | LINC01347 |  | PDGFC        |
|  | LINC01366 |  | TM7SF3       |

Table S6

|           |  |  |            |
|-----------|--|--|------------|
| LINC01436 |  |  | TSC22D1    |
| LINC01521 |  |  | MED26      |
| LINC01550 |  |  | AC115223.1 |
| LINC01559 |  |  | TMOD3      |
| LINC01684 |  |  | ENPP4      |
| LINC01695 |  |  | DNAH3      |
| LINC01783 |  |  | SNORA81    |
| LINC01806 |  |  | CRK        |
| LINC01814 |  |  | RNA5SP221  |
| LINC01833 |  |  | MOCOS      |
| LINC01836 |  |  | RNF141     |
| LINC01842 |  |  | HAP1       |
| LINC01873 |  |  | FAM120A    |
| LINC01979 |  |  | LPA        |
| LINC02068 |  |  | MCPH1-AS1  |
| LINC02352 |  |  | CDK2AP1    |
| LINC02362 |  |  | AP003498.3 |
| LINC02422 |  |  | FOXC1      |
| LINC02535 |  |  | AC025263.1 |
| LINC02541 |  |  | ZSWIM6     |
| LINC02560 |  |  | SPTBN5     |
| LINC02582 |  |  | DDX1       |
| LINC02649 |  |  | IVNS1ABP   |
| LINC02728 |  |  | AZI2       |
| LINC02731 |  |  | ATG2A      |
| LINC02762 |  |  | FBXO7      |
| LINC02821 |  |  | RPGRIP1L   |
| LINC02861 |  |  | ATP2A2     |
| LINP1     |  |  | SEL1L      |
| LINS1     |  |  | RNVU1-7    |
| LIPA      |  |  | IGHMBP2    |
| LITAF     |  |  | TAF8       |
| LLGL2     |  |  | AC107959.2 |
| LMAN2     |  |  | PIF1       |
| LMAN2L    |  |  | SNORA17B   |
| LMBR1     |  |  | LINC00921  |
| LMBR1L    |  |  | TWF1       |
| LMBRD1    |  |  | ZNF850     |
| LMCD1     |  |  | TMEM139    |
| LMNA      |  |  | GPATCH2    |
| LMNB1     |  |  | COX16      |
| LMNB2     |  |  | TMEM265    |
| LMO1      |  |  | CNTRL      |
| LMO2      |  |  | AP3B2      |
| LMO7      |  |  | H2AC21     |
| LMOD1     |  |  | HKDC1      |
| LMTK2     |  |  | B4GALT1    |
| LNPEP     |  |  | SUMO1      |
| LNPK      |  |  | KCNT2      |
| LNX2      |  |  | DNAJC13    |
| LOH12CR2  |  |  | ATP5PO     |
| LONP1     |  |  | EDN1       |
| LONRF1    |  |  | CRTAP      |
| LPAR6     |  |  | PM20D2     |
| LPCAT1    |  |  | E2F4       |
| LPCAT3    |  |  | TLR5       |
| LPCAT4    |  |  | RASSF8     |
| LPIN1     |  |  | RASGRP1    |
| LPXN      |  |  | SERPINB1   |
| LRATD2    |  |  | BCYRN1     |

Table S6

|  |           |  |  |              |
|--|-----------|--|--|--------------|
|  | LRCH1     |  |  | GYS1         |
|  | LRCH3     |  |  | ATXN7        |
|  | LRFN1     |  |  | LINC00887    |
|  | LRFN3     |  |  | SRSF5        |
|  | LRIG1     |  |  | ALG14        |
|  | LRIG2-DT  |  |  | AK2          |
|  | LRIG3     |  |  | ARHGAP26-IT1 |
|  | LRP4      |  |  | EEF2K        |
|  | LRP5      |  |  | GNPTAB       |
|  | LRP5L     |  |  | TIMM23B      |
|  | LRP6      |  |  | SLC39A8      |
|  | LRPAP1    |  |  | AC011195.1   |
|  | LRRC1     |  |  | AC018638.4   |
|  | LRRC15    |  |  | RN7SL5P      |
|  | LRRC23    |  |  | BCL2L11      |
|  | LRRC27    |  |  | PLAA         |
|  | LRRC32    |  |  | VTI1B        |
|  | LRRC37A9P |  |  | TSLP         |
|  | LRRC37BP1 |  |  | ASPHD2       |
|  | LRRC40    |  |  | AC068305.2   |
|  | LRRC42    |  |  | TMEM229B     |
|  | LRRC47    |  |  | AL662844.4   |
|  | LRRC59    |  |  | ZWINT        |
|  | LRRC8A    |  |  | FAM219A      |
|  | LRRC8E    |  |  | AC020915.5   |
|  | LRRFIP1   |  |  | IVD          |
|  | LRRFIP2   |  |  | RHNO1        |
|  | LRRK2     |  |  | HAND1        |
|  | LRRK2-DT  |  |  | H2AC4        |
|  | LRSAM1    |  |  | FGF2         |
|  | LSG1      |  |  | MYL6B        |
|  | LSM1      |  |  | AC245033.4   |
|  | LSM10     |  |  | USP22        |
|  | LSM12     |  |  | ATP5MC3      |
|  | LSM14A    |  |  | SPTLC1       |
|  | LSM3      |  |  | KIAA0586     |
|  | LSM4      |  |  | INTS12       |
|  | LSM7      |  |  | SLC35B2      |
|  | LSS       |  |  | SLC50A1      |
|  | LST1      |  |  | ABCG1        |
|  | LTA4H     |  |  | ZNF285       |
|  | LTB4R     |  |  | DDHD2        |
|  | LTBP1     |  |  | RARS1        |
|  | LTBP2     |  |  | SSPN         |
|  | LTBP3     |  |  | MRPL45       |
|  | LTF       |  |  | PPP4C        |
|  | LTO1      |  |  | ZADH2        |
|  | LUARIS    |  |  | CEBPZOS      |
|  | LUC7L     |  |  | ALDH6A1      |
|  | LUC7L2    |  |  | FAM171B      |
|  | LUC7L3    |  |  | MAGED2       |
|  | LURAP1L   |  |  | MARCHF5      |
|  | LUZP1     |  |  | GINS2        |
|  | LY6E      |  |  | PDCD1LG2     |
|  | LY6G5B    |  |  | AL078599.3   |
|  | LY6G5C    |  |  | RP1          |
|  | LY75      |  |  | PI4KB        |
|  | LY96      |  |  | AC244197.3   |
|  | LYAR      |  |  | PRPF31       |
|  | LYN       |  |  | AC119674.1   |

Table S6

|  |           |  |  |            |
|--|-----------|--|--|------------|
|  | LYPLA1    |  |  | EXOC8      |
|  | LYPLA2    |  |  | C21orf91   |
|  | LYRM1     |  |  | HCG4       |
|  | LYSMD2    |  |  | RNF20      |
|  | LZTR1     |  |  | Z93930.2   |
|  | LZTS1     |  |  | GOLM1      |
|  | LZTS2     |  |  | PTGFRN     |
|  | LZTS3     |  |  | TSPAN12    |
|  | MACF1     |  |  | LRRC8E     |
|  | MACO1     |  |  | GGT1       |
|  | MAD2L2    |  |  | LYRM2      |
|  | MADD      |  |  | SNORA17B   |
|  | MAF1      |  |  | PIM3       |
|  | MAFF      |  |  | AXL        |
|  | MAFG      |  |  | SNX17      |
|  | MAFK      |  |  | RERG       |
|  | MAGEF1    |  |  | ATP7A      |
|  | MAIP1     |  |  | GPN3       |
|  | MAL       |  |  | ABCA2      |
|  | MALL      |  |  | ARL4C      |
|  | MALSU1    |  |  | VGLL3      |
|  | MAMDC2    |  |  | ACTR1A     |
|  | MAML1     |  |  | CYBRD1     |
|  | MAMLD1    |  |  | SUGT1      |
|  | MAN1B1    |  |  | CTSA       |
|  | MAN2A1    |  |  | SKP2       |
|  | MAN2A2    |  |  | SERINC3    |
|  | MAN2C1    |  |  | CERCAM     |
|  | MANBA     |  |  | HJURP      |
|  | MAOA      |  |  | POLA1      |
|  | MAP1LC3B  |  |  | MRPL19     |
|  | MAP1LC3B2 |  |  | ADAM22     |
|  | MAP1S     |  |  | SLC41A1    |
|  | MAP2K2    |  |  | ADM2       |
|  | MAP2K3    |  |  | RNFT2      |
|  | MAP2K5    |  |  | FYTTD1P1   |
|  | MAP2K6    |  |  | MICAL2     |
|  | MAP2K7    |  |  | CAB39      |
|  | MAP3K12   |  |  | PLEKHA3    |
|  | MAP3K13   |  |  | SHC3       |
|  | MAP3K14   |  |  | MUC13      |
|  | MAP3K20   |  |  | PDE4B      |
|  | MAP3K2-DT |  |  | NAA50      |
|  | MAP3K3    |  |  | HMG20B     |
|  | MAP3K6    |  |  | COL22A1    |
|  | MAP3K7CL  |  |  | TANC2      |
|  | MAP4      |  |  | TBILA      |
|  | MAP4K5    |  |  | CYP27A1    |
|  | MAP7D1    |  |  | KLF2       |
|  | MAP7D2    |  |  | TIMMDC1    |
|  | MAPK1     |  |  | VCIPI1     |
|  | MAPK11    |  |  | FBXW10     |
|  | MAPK12    |  |  | COA4       |
|  | MAPK14    |  |  | MYO18A     |
|  | MAPK3     |  |  | TTC37      |
|  | MAPK7     |  |  | DCPS       |
|  | MAPK8     |  |  | INF2       |
|  | MAPK9     |  |  | CHDH       |
|  | MAPKAP1   |  |  | TMEM134    |
|  | MAPKAPK2  |  |  | AL354740.1 |

Table S6

|  |            |  |  |             |
|--|------------|--|--|-------------|
|  | MAPKAPK3   |  |  | SLC44A3     |
|  | MAPKAPK5   |  |  | AC090541.1  |
|  | MAPKBP1    |  |  | ERGIC2      |
|  | MAPRE1     |  |  | GAREM1      |
|  | MAPRE3-AS1 |  |  | CDK16       |
|  | MARCHF1    |  |  | KMT2A       |
|  | MARCHF2    |  |  | UQCRC1      |
|  | MARCHF4    |  |  | TYRO3       |
|  | MARCHF5    |  |  | USP34       |
|  | MARCHF7    |  |  | AEBP2       |
|  | MARCKS     |  |  | IGHEP2      |
|  | MARF1      |  |  | MRPL11      |
|  | MARK3      |  |  | LRRC8A      |
|  | MARK4      |  |  | CYP4F3      |
|  | MARS1      |  |  | TES         |
|  | MAST1      |  |  | SCAF1       |
|  | MAST2      |  |  | BET1L       |
|  | MAT2A      |  |  | ECI2        |
|  | MAU2       |  |  | APP         |
|  | MAX        |  |  | PAFAH1B2    |
|  | MBD1       |  |  | AMIGO2      |
|  | MBD2       |  |  | SUMO2       |
|  | MBD3       |  |  | RBIS        |
|  | MBIP       |  |  | THSD1       |
|  | MBNL1      |  |  | HCCS        |
|  | MBNL3      |  |  | AC005622.1  |
|  | MBOAT7     |  |  | LNPEP       |
|  | MBP        |  |  | AMZ2        |
|  | MBTD1      |  |  | BX276092.9  |
|  | MBTPS2     |  |  | TFCP2L1     |
|  | MCAM       |  |  | MIR210HG    |
|  | MCAT       |  |  | PPIA        |
|  | MCC        |  |  | LCAL1       |
|  | MCCC1      |  |  | PRMT2       |
|  | MCCC2      |  |  | EGR3        |
|  | MCF2L      |  |  | CNIH1       |
|  | MCFD2      |  |  | DPH5        |
|  | MCIDAS     |  |  | OPRK1       |
|  | MCL1       |  |  | PROS1       |
|  | MCM3AP     |  |  | AL022311.1  |
|  | MCM7       |  |  | NME1-NME2   |
|  | MCOLN1     |  |  | AC125807.2  |
|  | MCOLN2     |  |  | CHPT1       |
|  | MCRIP1     |  |  | BTG3        |
|  | MCRIP2     |  |  | CYTH3       |
|  | MCTP2      |  |  | ISOC1       |
|  | MCTS1      |  |  | P3H2        |
|  | MDC1       |  |  | CCDC115     |
|  | MDFIC      |  |  | N4BP2L2-IT2 |
|  | MDH1       |  |  | RBM22       |
|  | MDH1B      |  |  | GNL1        |
|  | MDH2       |  |  | TEPSIN      |
|  | MDK        |  |  | LSM7        |
|  | MDM1       |  |  | NUP160      |
|  | MDM2       |  |  | POLR3A      |
|  | MDN1       |  |  | MYRFL       |
|  | ME2        |  |  | CCDC86      |
|  | ME3        |  |  | BCL7C       |
|  | MECP2      |  |  | AC020907.3  |
|  | MED1       |  |  | AC005840.4  |



Table S6

|  |         |  |  |            |
|--|---------|--|--|------------|
|  | MED10   |  |  | TTC30A     |
|  | MED11   |  |  | AC092868.2 |
|  | MED12   |  |  | PAFAH1B3   |
|  | MED13L  |  |  | FAHD1      |
|  | MED15   |  |  | AC097059.1 |
|  | MED16   |  |  | MSANTD4    |
|  | MED17   |  |  | AC083880.1 |
|  | MED18   |  |  | AC084018.2 |
|  | MED20   |  |  | VPS29      |
|  | MED22   |  |  | GPC3       |
|  | MED23   |  |  | USP49      |
|  | MED24   |  |  | PPP4R1L    |
|  | MED27   |  |  | CEACAM20   |
|  | MED4    |  |  | HYOU1      |
|  | MED6    |  |  | SP8        |
|  | MED8    |  |  | BIN1       |
|  | MED9    |  |  | CCND1      |
|  | MEF2D   |  |  | ARL14EP    |
|  | MEG3    |  |  | TXNDC11    |
|  | MEIS1   |  |  | SRPRA      |
|  | MEIS2   |  |  | DNAH11     |
|  | MEPCE   |  |  | LINC00431  |
|  | MERTK   |  |  | ZNF638     |
|  | MESD    |  |  | ZNF654     |
|  | METRNL  |  |  | PHYH       |
|  | METTL16 |  |  | LIMA1      |
|  | METTL17 |  |  | AL671277.1 |
|  | METTL23 |  |  | MECOM      |
|  | METTL26 |  |  | ANXA13     |
|  | METTL2A |  |  | GPR161     |
|  | METTL3  |  |  | KLHDC3     |
|  | METTL5  |  |  | CARNMT1    |
|  | METTL7A |  |  | UBXN4      |
|  | METTL7B |  |  | EPHB2      |
|  | METTL9  |  |  | PLEKHG5    |
|  | MFAP1   |  |  | LINC00881  |
|  | MFGE8   |  |  | RPP25      |
|  | MFHAS1  |  |  | REXO1      |
|  | MFN2    |  |  | AL031587.5 |
|  | MFNG    |  |  | FN3KRP     |
|  | MFSD1   |  |  | CCDC171    |
|  | MFSD10  |  |  | GCNA       |
|  | MFSD14A |  |  | LAMP2      |
|  | MFSD2A  |  |  | AL450384.2 |
|  | MFSD5   |  |  | SOAT1      |
|  | MFSD6   |  |  | MIS12      |
|  | MGA     |  |  | SNX16      |
|  | MGAM    |  |  | HECTD1     |
|  | MGAT1   |  |  | NLRP3      |
|  | MGAT4B  |  |  | RHOF       |
|  | MGAT4C  |  |  | C5orf24    |
|  | MGAT5   |  |  | ALS2       |
|  | MGLL    |  |  | NDUFC2     |
|  | MGMT    |  |  | PRXL2B     |
|  | MGRN1   |  |  | CAPN1      |
|  | MGST3   |  |  | FREM2      |
|  | MIA2    |  |  | RNU6-9     |
|  | MIA3    |  |  | PVT1       |
|  | MIB1    |  |  | ACTR2      |
|  | MICA    |  |  | ZKSCAN2    |

Table S6

|            |  |                |
|------------|--|----------------|
| MICAL1     |  | ZNF702P        |
| MICAL3     |  | DNHD1          |
| MICALL2    |  | MTG2           |
| MICB       |  | GMEB2          |
| MICOS10    |  | SUSD3          |
| MICOS13    |  | AP001160.1     |
| MID1       |  | CCDC130        |
| MID1IP1    |  | SMARCD2        |
| MID2       |  | MIER1          |
| MIDN       |  | PET100         |
| MIEF1      |  | ADAMTSL4-AS1   |
| MIEN1      |  | KRT18          |
| MIER1      |  | DYNLT1         |
| MIER2      |  | AC009495.3     |
| MIF4GD     |  | WASF2          |
| MIGA2      |  | EPB41L2        |
| MILR1      |  | FAH            |
| MINDY3     |  | AC126283.2     |
| MINK1      |  | AIG1           |
| MIOS       |  | TPMT           |
| MIPOL1     |  | CRLF2          |
| MIR22HG    |  | AHCYL1         |
| MIR29B2CHG |  | CAPZA2         |
| MIR3189    |  | CCDC191        |
| MIR3945HG  |  | YWHAB          |
| MIR4697HG  |  | MPI            |
| MISP       |  | MTDH           |
| MKI67      |  | STX5           |
| MKNK2      |  | ADGRF4         |
| MKRN2      |  | AC024293.1     |
| MLEC       |  | TXNDC17        |
| MLF2       |  | RHEBL1         |
| MLH1       |  | RPL17-C18orf32 |
| MLH3       |  | TCN2           |
| MLKL       |  | AC025539.1     |
| MLLT1      |  | GRK6           |
| MLLT10     |  | CRYBG2         |
| MLLT11     |  | ZMAT3          |
| MLNR       |  | STAT6          |
| MLST8      |  | ATP6V1C1       |
| MLX        |  | SH3BGRL        |
| MLXIP      |  | PIK3IP1        |
| MLXIPL     |  | PLAGL2         |
| MMAA       |  | SNX33          |
| MMAB       |  | PHLDB2         |
| MMADHC     |  | SCARNA22       |
| MMP1       |  | OIP5           |
| MMP10      |  | AP003499.4     |
| MMP12      |  | TMEM44-AS1     |
| MMP14      |  | NAA38          |
| MMP24OS    |  | TOP3B          |
| MMP25      |  | ZKSCAN8        |
| MMP25-AS1  |  | PBDC1          |
| MMP28      |  | WDFY2          |
| MMP3       |  | BMP2K          |
| MMS19      |  | ODF2L          |
| MNAT1      |  | CSF1R          |
| MND1       |  | ABCA6          |
| MOAP1      |  | RB1CC1         |
| MOB1A      |  | GPD2           |

Table S6

|  |           |  |  |                |
|--|-----------|--|--|----------------|
|  | MOB1B     |  |  | FBXL12         |
|  | MOB2      |  |  | SLC43A2        |
|  | MOB3C     |  |  | RAB40B         |
|  | MOCOS     |  |  | ACNATP         |
|  | MOCS1     |  |  | TET3           |
|  | MOGS      |  |  | PPP2R2A        |
|  | MON1A     |  |  | AKTIP          |
|  | MON1B     |  |  | KRCC1          |
|  | MON2      |  |  | LRIF1          |
|  | MORC2     |  |  | XDH            |
|  | MORC3     |  |  | MROH8          |
|  | MORC4     |  |  | FAM225B        |
|  | MOSMO     |  |  | LOX            |
|  | MOSPD1    |  |  | MRPL47         |
|  | MOSPD2    |  |  | NFATC4         |
|  | MOV10     |  |  | ZNF652         |
|  | MPDU1     |  |  | PCYT2          |
|  | MPG       |  |  | FBXO17         |
|  | MPHOSPH10 |  |  | CDK5RAP3       |
|  | MPHOSPH8  |  |  | IGF1R          |
|  | MPLKIP    |  |  | AKAP10         |
|  | MPP1      |  |  | TAF4B          |
|  | MPP3      |  |  | UBTF           |
|  | MPP4      |  |  | NUP58          |
|  | MPPE1     |  |  | HMCN1          |
|  | MPRIP     |  |  | POU2F2         |
|  | MPST      |  |  | VPS28          |
|  | MPV17     |  |  | ZFP62          |
|  | MPZ       |  |  | NDUFAB1        |
|  | MPZL1     |  |  | HIBADH         |
|  | MPZL2     |  |  | MALAT1         |
|  | MR1       |  |  | ACAD10         |
|  | MRE11     |  |  | MGLL           |
|  | MRFAP1    |  |  | NFKBID         |
|  | MRFAP1L1  |  |  | SIAH2          |
|  | MRGBP     |  |  | AL450338.1     |
|  | MRI1      |  |  | Z95114.1       |
|  | MRM2      |  |  | GNS            |
|  | MRM3      |  |  | ABCA10         |
|  | MRNIP     |  |  | PARP4          |
|  | MRO       |  |  | SH3TC2         |
|  | MROH1     |  |  | ZNF597         |
|  | MROH8     |  |  | TRDMT1         |
|  | MRPL1     |  |  | DMKN           |
|  | MRPL10    |  |  | TMEM205        |
|  | MRPL11    |  |  | HEXB           |
|  | MRPL14    |  |  | MIR3143        |
|  | MRPL17    |  |  | SPAG1          |
|  | MRPL18    |  |  | FGFR2          |
|  | MRPL2     |  |  | RPE            |
|  | MRPL20    |  |  | OASL2P         |
|  | MRPL22    |  |  | MKKS           |
|  | MRPL23    |  |  | PDCD4          |
|  | MRPL28    |  |  | YBX1P10        |
|  | MRPL3     |  |  | NABP2          |
|  | MRPL30    |  |  | TNKS2          |
|  | MRPL32    |  |  | CEP97          |
|  | MRPL33    |  |  | FITM2          |
|  | MRPL34    |  |  | PLXNA3         |
|  | MRPL37    |  |  | RPL36A-HNRNPH2 |

Table S6

|  |          |  |  |            |
|--|----------|--|--|------------|
|  | MRPL39   |  |  | MRTFA      |
|  | MRPL4    |  |  | RANGAP1    |
|  | MRPL40   |  |  | BIRC2      |
|  | MRPL41   |  |  | PBX2       |
|  | MRPL44   |  |  | NSD3       |
|  | MRPL48   |  |  | AC009779.4 |
|  | MRPL49   |  |  | ALDOA      |
|  | MRPL51   |  |  | KCTD5      |
|  | MRPL52   |  |  | SCO2       |
|  | MRPL54   |  |  | REXO2      |
|  | MRPL55   |  |  | ATP5ME     |
|  | MRPS10   |  |  | NUDT16     |
|  | MRPS15   |  |  | HSD17B2    |
|  | MRPS18A  |  |  | PRCP       |
|  | MRPS2    |  |  | ARSL       |
|  | MRPS21   |  |  | ZNF764     |
|  | MRPS26   |  |  | SEC16A     |
|  | MRPS33   |  |  | AC108010.1 |
|  | MRPS34   |  |  | RIOK3      |
|  | MRPS5    |  |  | TMBIM1     |
|  | MRPS7    |  |  | UNK        |
|  | MRS2     |  |  | BZW2       |
|  | MRTFA    |  |  | ZFPM2-AS1  |
|  | MRTFB    |  |  | PTPRK      |
|  | MSANTD3  |  |  | LINC01554  |
|  | MSANTD4  |  |  | AC004477.1 |
|  | MSC      |  |  | ZNF711     |
|  | MSH5     |  |  | ZNF888     |
|  | MSH6     |  |  | NFIB       |
|  | MSL3     |  |  | STK40      |
|  | MSMO1    |  |  | SLPI       |
|  | MSR1     |  |  | C2orf42    |
|  | MSRB2    |  |  | IL1B       |
|  | MSTO1    |  |  | UHRF1      |
|  | MSX2     |  |  | SLC16A6    |
|  | MT1XP1   |  |  | BRAF       |
|  | MT2A     |  |  | APMAP      |
|  | MT2P1    |  |  | RPS29      |
|  | MTA2     |  |  | CA12       |
|  | MTA3     |  |  | GDF11      |
|  | MTCH1    |  |  | OGT        |
|  | MTCH2    |  |  | OAT        |
|  | MT-CO1   |  |  | SLC25A39   |
|  | MTCO1P12 |  |  | P4HA1      |
|  | MT-CO2   |  |  | MIR7-3HG   |
|  | MT-CO3   |  |  | ALX1       |
|  | MT-CYB   |  |  | AL445685.3 |
|  | MTDH     |  |  | ADGRL2     |
|  | MTERF2   |  |  | AC005747.1 |
|  | MTF1     |  |  | ZNF891     |
|  | MTFR1L   |  |  | WDR72      |
|  | MTHFD1   |  |  | CKS2       |
|  | MTHFD1L  |  |  | ERBIN      |
|  | MTHFD2   |  |  | RPL10A     |
|  | MTHFD2L  |  |  | AGBL5      |
|  | MTHFR    |  |  | SLC39A9    |
|  | MTHFSD   |  |  | BRCC3      |
|  | MTIF3    |  |  | AC051619.7 |
|  | MTLN     |  |  | SLC9A6     |
|  | MTM1     |  |  | C4BPB      |

Table S6

|  |           |  |  |                 |
|--|-----------|--|--|-----------------|
|  | MTMR10    |  |  | POLA2           |
|  | MTMR12    |  |  | FAM71A          |
|  | MTMR14    |  |  | DHFRP1          |
|  | MTMR2     |  |  | AC009133.6      |
|  | MTMR9LP   |  |  | LINP1           |
|  | MT-ND1    |  |  | NT5C3AP1        |
|  | MTND2P28  |  |  | SCO2            |
|  | MT-ND6    |  |  | KLHL23          |
|  | MTOR      |  |  | PSMA5           |
|  | MTR       |  |  | CA8             |
|  | MTREX     |  |  | CHD9            |
|  | MTRF1L    |  |  | EPHA7           |
|  | MTRNR2L12 |  |  | ALDH2           |
|  | MTRNR2L8  |  |  | CASK            |
|  | MTSS2     |  |  | TTC17           |
|  | MT-TC     |  |  | SLC19A3         |
|  | MT-TP     |  |  | OXTR            |
|  | MTURN     |  |  | DPCD            |
|  | MTX1      |  |  | CYB561          |
|  | MTX1P1    |  |  | EPHX1           |
|  | MTX3      |  |  | RPN2            |
|  | MUC1      |  |  | RPP14           |
|  | MUC20-OT1 |  |  | UBR4            |
|  | MUC4      |  |  | POLD4           |
|  | MUC5AC    |  |  | AC099518.3      |
|  | MUC5B     |  |  | ATP6V1G2-DDX39B |
|  | MUL1      |  |  | AC008750.8      |
|  | MVB12B    |  |  | FBL             |
|  | MVD       |  |  | LINC01612       |
|  | MVP       |  |  | PGAM1P7         |
|  | MX1       |  |  | OLFM3           |
|  | MX2       |  |  | NUDCD1          |
|  | MXD1      |  |  | KIAA1143        |
|  | MXD4      |  |  | IPMK            |
|  | MXI1      |  |  | CTDSP2          |
|  | MXRA5     |  |  | SEC22C          |
|  | MXRA7     |  |  | ARHGAP19        |
|  | MXRA8     |  |  | ARID5A          |
|  | MYADM     |  |  | PPP3CA          |
|  | MYBBP1A   |  |  | RTF2            |
|  | MYC       |  |  | TBC1D15         |
|  | MYCBP2    |  |  | DFFA            |
|  | MYCT1     |  |  | ALG8            |
|  | MYD88     |  |  | CLNS1A          |
|  | MYDGF     |  |  | TNFRSF21        |
|  | MYH14     |  |  | FBXO22          |
|  | MYL12A    |  |  | AC243772.2      |
|  | MYL12B    |  |  | GPBAR1          |
|  | MYL6      |  |  | MYO19           |
|  | MYL6B     |  |  | LPCAT2          |
|  | MYLK      |  |  | LINC01358       |
|  | MYO10     |  |  | G3BP1           |
|  | MYO15B    |  |  | GID8            |
|  | MYO18A    |  |  | AC005154.5      |
|  | MYO1C     |  |  | GATM            |
|  | MYO1D     |  |  | SGPP1           |
|  | MYO1G     |  |  | PLS3-AS1        |
|  | MYO6      |  |  | TMPRSS3         |
|  | MYO9A     |  |  | SCAF4           |
|  | MYO9B     |  |  | CLU             |

Table S6

|  |          |  |            |
|--|----------|--|------------|
|  | MYOF     |  | NCK1       |
|  | MYOM2    |  | SH3RF3     |
|  | MYZAP    |  | SRP72      |
|  | MZB1     |  | MUC20      |
|  | MZT2A    |  | SPCS1      |
|  | MZT2B    |  | ZNF212     |
|  | N4BP1    |  | POLG       |
|  | N4BP3    |  | SNHG17     |
|  | NAA10    |  | C6orf62    |
|  | NAA20    |  | TMC7       |
|  | NAA35    |  | PDXDC1     |
|  | NAA38    |  | SAP30BP    |
|  | NAA60    |  | ZCRB1      |
|  | NAB1     |  | CCNB1IP1   |
|  | NAB2     |  | PPP1R9A    |
|  | NACA     |  | NFRKB      |
|  | NADK     |  | EIF2AK1    |
|  | NADK2    |  | NME4       |
|  | NADSYN1  |  | CA11       |
|  | NAGK     |  | DENND11    |
|  | NAIF1    |  | USP19      |
|  | NAMPT    |  | C22orf39   |
|  | NAMPTP1  |  | ATP6V0E1   |
|  | NANP     |  | RAF1       |
|  | NAP1L4   |  | LINC00992  |
|  | NAP1L5   |  | BTD        |
|  | NAPA     |  | NUDT2      |
|  | NAPG     |  | RHOC       |
|  | NAPSA    |  | AL023755.1 |
|  | NARF     |  | ASS1P11    |
|  | NARS1    |  | AGBL1-AS1  |
|  | NASP     |  | CMYA5      |
|  | NAT10    |  | AC073869.1 |
|  | NAT14    |  | MRPL42     |
|  | NAT9     |  | TMEM168    |
|  | NATD1    |  | AC007923.1 |
|  | NAXD     |  | CETN2      |
|  | NAXE     |  | TMEM129    |
|  | NBAS     |  | AC104837.2 |
|  | NBL1     |  | OSR2       |
|  | NBN      |  | AC006960.4 |
|  | NBPF11   |  | HTD2       |
|  | NBPF14   |  | IDH3B      |
|  | NBPF15   |  | HABP4      |
|  | NBPF19   |  | TLN2       |
|  | NBPF20   |  | RNVU1-18   |
|  | NBPF25P  |  | PRPF38B    |
|  | NBPF26   |  | RPL37A     |
|  | NBPF8    |  | LRPAP1     |
|  | NBPF9    |  | OR4V1P     |
|  | NBR1     |  | SLC25A24   |
|  | NCALD    |  | DSG2       |
|  | NCAPH2   |  | CACNG4     |
|  | NCBP2AS2 |  | FRMD4B     |
|  | NCBP3    |  | PACERR     |
|  | NCCR1    |  | THYN1      |
|  | NCDN     |  | GTF3A      |
|  | NCEH1    |  | USP47      |
|  | NCF2     |  | KIFC2      |
|  | NCF4     |  | AC091167.2 |

Table S6

|  |            |  |  |            |
|--|------------|--|--|------------|
|  | NCKIPSD    |  |  | BDH1       |
|  | NCL        |  |  | ALDH5A1    |
|  | NCOA3      |  |  | OLA1       |
|  | NCOA4      |  |  | AC245041.2 |
|  | NCOA7      |  |  | SUCLA2     |
|  | NCOR2      |  |  | VSIG1      |
|  | NCS1       |  |  | CHKB-CPT1B |
|  | NCSTN      |  |  | MYO1D      |
|  | NDEL1      |  |  | LINC-PINT  |
|  | NDN        |  |  | PTPRG-AS1  |
|  | NDNF       |  |  | TRIM67     |
|  | NDRG1      |  |  | DUSP15     |
|  | NDRG2      |  |  | AL451165.1 |
|  | NDRG3      |  |  | AL603832.3 |
|  | NDST1      |  |  | TMEM64     |
|  | NDUFA10    |  |  | STAC       |
|  | NDUFA12    |  |  | ANKRD28    |
|  | NDUFA4     |  |  | INTS1      |
|  | NDUFA4L2   |  |  | CAPRIN2    |
|  | NDUFA5     |  |  | DDX55      |
|  | NDUFAB1    |  |  | ACTR3B     |
|  | NDUFAF2    |  |  | PRPF38A    |
|  | NDUFAF5    |  |  | LTB        |
|  | NDUFAF8    |  |  | ARF5       |
|  | NDUFB1     |  |  | PGM1       |
|  | NDUFB10    |  |  | SELENOT    |
|  | NDUFB3     |  |  | SNORD12B   |
|  | NDUFB4     |  |  | GRB14      |
|  | NDUFB4P12  |  |  | ARMC5      |
|  | NDUFB8     |  |  | TMEM213    |
|  | NDUFB9     |  |  | MGAT1      |
|  | NDUFC2     |  |  | ERCC6L2    |
|  | NDUFS2     |  |  | DBR1       |
|  | NDUFS4     |  |  | PAX8-AS1   |
|  | NDUFS5     |  |  | RNVU1-19   |
|  | NDUFS6     |  |  | TK1        |
|  | NDUFS7     |  |  | MRPL44     |
|  | NDUFS8     |  |  | MIR222HG   |
|  | NDUFV1     |  |  | AC079466.1 |
|  | NDUFV2-AS1 |  |  | MYBL2      |
|  | NEAT1      |  |  | FBRS       |
|  | NEBL       |  |  | USP10      |
|  | NECAP1     |  |  | JADE1      |
|  | NECAP2     |  |  | AL136164.3 |
|  | NECTIN2    |  |  | ARHGAP1    |
|  | NEDD1      |  |  | GLB1       |
|  | NEDD4L     |  |  | H2BC8      |
|  | NEDD8      |  |  | PARP6      |
|  | NEDD9      |  |  | RRP9       |
|  | NEIL2      |  |  | C17orf75   |
|  | NEK3       |  |  | PEPD       |
|  | NEK5       |  |  | DDC        |
|  | NEK7       |  |  | ZNF382     |
|  | NEK9       |  |  | NSUN5      |
|  | NELFA      |  |  | RAD9A      |
|  | NELFB      |  |  | PDLIM1     |
|  | NELFCD     |  |  | WNT2B      |
|  | NELFE      |  |  | ALAD       |
|  | NEMP2      |  |  | PCLAF      |
|  | NENF       |  |  | RAB13      |

Table S6

|  |         |  |  |            |
|--|---------|--|--|------------|
|  | NES     |  |  | FRMD3      |
|  | NEURL1B |  |  | TACSTD2    |
|  | NEXN    |  |  | BRK1       |
|  | NF2     |  |  | PCMTD2     |
|  | NFASC   |  |  | ZMYND8     |
|  | NFATC1  |  |  | ECHDC2     |
|  | NFATC2  |  |  | ZFP69B     |
|  | NFATC4  |  |  | GANC       |
|  | NFE2L1  |  |  | AIFM1      |
|  | NFE2L3  |  |  | KLHL18     |
|  | NFIB    |  |  | AP005482.2 |
|  | NFIL3   |  |  | TBC1D32    |
|  | NFIX    |  |  | LAMTOR4    |
|  | NFKBID  |  |  | MDFIC      |
|  | NFKBIL1 |  |  | NCOA5      |
|  | NFRKB   |  |  | RPL11P3    |
|  | NFX1    |  |  | RNF187     |
|  | NFYC    |  |  | PAQR4      |
|  | NGRN    |  |  | CCNDBP1    |
|  | NHLRC2  |  |  | HOXB3      |
|  | NHP2    |  |  | SNORA20    |
|  | NIBAN1  |  |  | YBX1P1     |
|  | NIBAN2  |  |  | CAVIN1     |
|  | NID1    |  |  | MEF2D      |
|  | NIF3L1  |  |  | FKBP3      |
|  | NIN     |  |  | AGTPBP1    |
|  | NINJ1   |  |  | ATRN       |
|  | NIPA2   |  |  | SLC10A7    |
|  | NIPAL3  |  |  | NIPBL      |
|  | NIPAL4  |  |  | SERPINB8   |
|  | NIPBL   |  |  | MMP24OS    |
|  | NISCH   |  |  | FBXO38     |
|  | NIT1    |  |  | USP9X      |
|  | NKD1    |  |  | ZNF280C    |
|  | NKIRAS2 |  |  | ZNF592     |
|  | NKTR    |  |  | GINS4      |
|  | NLE1    |  |  | GATD1      |
|  | NLN     |  |  | YDJC       |
|  | NLRP1   |  |  | PPP1R13L   |
|  | NLRP3   |  |  | HSPB11     |
|  | NMD3    |  |  | ZSWIM3     |
|  | NME1    |  |  | CLEC4O     |
|  | NME3    |  |  | MYO1E      |
|  | NME5    |  |  | MRPL43     |
|  | NME8    |  |  | TPD52      |
|  | NMI     |  |  | SERPINB5   |
|  | NMRAL1  |  |  | CHMP2A     |
|  | NMRAL2P |  |  | TFAM       |
|  | NMT1    |  |  | EIF3I      |
|  | NMT2    |  |  | SNHG8      |
|  | NMU     |  |  | MAGED1     |
|  | NNT     |  |  | COMMD4     |
|  | NOC2L   |  |  | TOPBP1     |
|  | NOC3L   |  |  | SLC38A6    |
|  | NOC4L   |  |  | JDP2       |
|  | NOD1    |  |  | DDR1       |
|  | NOL6    |  |  | CGAS       |
|  | NOL8    |  |  | TMED9      |
|  | NOLC1   |  |  | ARFRP1     |
|  | NOMO3   |  |  | FOXN3      |



Table S6

|  |           |  |  |            |
|--|-----------|--|--|------------|
|  | NOP10     |  |  | SLCO5A1    |
|  | NOP16     |  |  | AP000331.1 |
|  | NOP2      |  |  | CDH18      |
|  | NOP53     |  |  | SMG1       |
|  | NOP56     |  |  | GYG2       |
|  | NOP58     |  |  | C1orf21    |
|  | NOP9      |  |  | ITGB1BP1   |
|  | NORAD     |  |  | STOML2     |
|  | NOSIP     |  |  | IMPDH1P10  |
|  | NOSTRIN   |  |  | STYX       |
|  | NOTCH1    |  |  | POU2F1     |
|  | NOTCH2    |  |  | AC141586.1 |
|  | NOTCH4    |  |  | PLPBP      |
|  | NOVA2     |  |  | KHDRBS1    |
|  | NOXRED1   |  |  | DEK        |
|  | NPAS1     |  |  | FUT10      |
|  | NPC1      |  |  | GALC       |
|  | NPC2      |  |  | AMFR       |
|  | NPHS1     |  |  | HIGD2A     |
|  | NPIPA1    |  |  | TCEA1      |
|  | NPIPA3    |  |  | POU5F1     |
|  | NPIPB11   |  |  | C11orf54   |
|  | NPIPB12   |  |  | H2BC5      |
|  | NPIPB13   |  |  | LCN2       |
|  | NPIPB3    |  |  | HSPA8      |
|  | NPIPB4    |  |  | C1orf52    |
|  | NPIPB5    |  |  | TMEM141    |
|  | NPIPP1    |  |  | AP000944.5 |
|  | NPL       |  |  | RGS2       |
|  | NPLOC4    |  |  | NCS1       |
|  | NPM1      |  |  | BRD1       |
|  | NPR1      |  |  | HIBCH      |
|  | NPR2      |  |  | MYNN       |
|  | NPR3      |  |  | IGFBP2     |
|  | NPRL2     |  |  | E2F1       |
|  | NQO1      |  |  | ZC3H4      |
|  | NQO2      |  |  | NDUFA10    |
|  | NR1D2     |  |  | LPAR1      |
|  | NR1H2     |  |  | TNFRSF14   |
|  | NR1H3     |  |  | AC112907.3 |
|  | NR2C2     |  |  | AC007255.1 |
|  | NR2C2AP   |  |  | TXNL4A     |
|  | NR2F1-AS1 |  |  | DYNC112    |
|  | NR4A1     |  |  | SERTAD3    |
|  | NR4A2     |  |  | PON2       |
|  | NR5A2     |  |  | MAFK       |
|  | NRBP1     |  |  | SAYSD1     |
|  | NRCAM     |  |  | BBS4       |
|  | NRDC      |  |  | SELENOH    |
|  | NRF1      |  |  | CHCHD1     |
|  | NRGN      |  |  | TSNARE1    |
|  | NRIP1     |  |  | DCBLD2     |
|  | NSD2      |  |  | UTP18      |
|  | NSF       |  |  | MCM5       |
|  | NSMAF     |  |  | IL1R1      |
|  | NSMCE1    |  |  | PRELID3B   |
|  | NSMCE4A   |  |  | SDE2       |
|  | NSMF      |  |  | TIMM23     |
|  | NSRP1     |  |  | EDEM1      |
|  | NSUN2     |  |  | RPL27      |

Table S6

|  |          |  |              |
|--|----------|--|--------------|
|  | NSUN4    |  | MYCL         |
|  | NSUN5    |  | C2CD5        |
|  | NSUN5P1  |  | MMP24        |
|  | NSUN7    |  | CSTF3        |
|  | NT5C     |  | TMEM217      |
|  | NT5C3A   |  | LINC00842    |
|  | NT5C3AP1 |  | TDRKH        |
|  | NT5C3B   |  | ANKRD18B     |
|  | NT5DC2   |  | CCDC25       |
|  | NTHL1    |  | GLT8D1       |
|  | NTMT1    |  | FCF1         |
|  | NTNG2    |  | STK25        |
|  | NUAK1    |  | SCAMP1       |
|  | NUB1     |  | GSDMC        |
|  | NUBP1    |  | CERS2        |
|  | NUCKS1   |  | DNAH12       |
|  | NUDC     |  | EPB41L4A-AS1 |
|  | NUDCD3   |  | AC245041.1   |
|  | NUDT12   |  | HIST1H3B     |
|  | NUDT16L1 |  | CDC42P6      |
|  | NUDT4    |  | XPO7         |
|  | NUMA1    |  | HPS5         |
|  | NUMB     |  | SNORA7A      |
|  | NUP133   |  | MCM3AP       |
|  | NUP153   |  | TNPO1        |
|  | NUP155   |  | MCM3AP-AS1   |
|  | NUP188   |  | LATS1        |
|  | NUP43    |  | CKLF-CMTM1   |
|  | NUP62CL  |  | MEFV         |
|  | NUP85    |  | UGCG         |
|  | NUPR1    |  | ALKBH1       |
|  | NUS1     |  | HELQ         |
|  | NUTF2    |  | ENO3         |
|  | NVL      |  | ZNF35        |
|  | NXF1     |  | MPRIP        |
|  | NXNL2    |  | RPL17        |
|  | NXT1     |  | H4C13        |
|  | NXT2     |  | PTK7         |
|  | NYNRIN   |  | CTSL3P       |
|  | OAF      |  | KDM4A        |
|  | OARD1    |  | PPP1R14B     |
|  | OAS1     |  | COMMD7       |
|  | OAS2     |  | TAF2         |
|  | OAS3     |  | STRIP1       |
|  | OASL     |  | DMD          |
|  | OAT      |  | PANX1        |
|  | OAZ2     |  | RAP1A        |
|  | OBSCN    |  | TTLL1        |
|  | ODC1     |  | MRPL23       |
|  | ODF2     |  | ATM          |
|  | ODF2L    |  | SCRN3        |
|  | ODF3B    |  | SNORA21B     |
|  | OGA      |  | HNRNPK       |
|  | OGDH     |  | CCDC152      |
|  | OGFOD1   |  | FUNDC2       |
|  | OGG1     |  | ACBD5        |
|  | OLA1     |  | AF196969.1   |
|  | OLIG1    |  | SETDB1       |
|  | OLR1     |  | MED8         |
|  | OMA1     |  | ECD          |

Table S6

|  |          |  |  |            |
|--|----------|--|--|------------|
|  | OPHN1    |  |  | TPT1       |
|  | OR7E14P  |  |  | FYN        |
|  | OR7E36P  |  |  | TMEM72-AS1 |
|  | OR7E37P  |  |  | AL365203.2 |
|  | OR7E38P  |  |  | AKAP2      |
|  | ORA1     |  |  | RNPEPL1    |
|  | ORA12    |  |  | RAB42      |
|  | ORC2     |  |  | AC091271.1 |
|  | ORC3     |  |  | MZF1-AS1   |
|  | ORMDL3   |  |  | RO60       |
|  | OS9      |  |  | MARS2      |
|  | OSBPL10  |  |  | SLC17A9    |
|  | OSBPL1A  |  |  | CXCR4      |
|  | OSBPL2   |  |  | NKIRAS2    |
|  | OSBPL5   |  |  | MYBBP1A    |
|  | OSBPL7   |  |  | CPNE8      |
|  | OSBPL9   |  |  | ANO3       |
|  | OSER1    |  |  | ID2        |
|  | OSGEP    |  |  | TOGARAM1   |
|  | OSGIN2   |  |  | BRCA1      |
|  | OTUB1    |  |  | TNFRSF8    |
|  | OTUD3    |  |  | CCNF       |
|  | OTUD4    |  |  | CCR4       |
|  | OTUD7B   |  |  | OR1F2P     |
|  | OTULINL  |  |  | CLEC7A     |
|  | OTX1     |  |  | ZFAND6     |
|  | OXA1L    |  |  | PUS7       |
|  | OXCT1    |  |  | LNX1       |
|  | OXR1     |  |  | ATP5MC2    |
|  | OXSR1    |  |  | TBRG4      |
|  | P2RX4    |  |  | YIF1B      |
|  | P3H1     |  |  | RPL6P27    |
|  | P3H2     |  |  | DHX38      |
|  | P3H3     |  |  | RPL7P1     |
|  | P3H4     |  |  | ADCY7      |
|  | P4HA2    |  |  | GLOD4      |
|  | P4HB     |  |  | SNX27      |
|  | PA2G4    |  |  | SCGN       |
|  | PAAF1    |  |  | ROGDI      |
|  | PABPC1   |  |  | FAM199X    |
|  | PACC1    |  |  | NELFB      |
|  | PACS2    |  |  | MTR        |
|  | PACSIN2  |  |  | SCIN       |
|  | PACSIN3  |  |  | CHRNA5     |
|  | PADI2    |  |  | POLR2L     |
|  | PAF1     |  |  | METTL5     |
|  | PAFAH1B2 |  |  | ZNF395     |
|  | PAIP1    |  |  | KIF3B      |
|  | PAK1     |  |  | STXBP6     |
|  | PAK2     |  |  | CYP21A1P   |
|  | PALD1    |  |  | HSPA14     |
|  | PALLD    |  |  | TGFBR1     |
|  | PALM     |  |  | UGT8       |
|  | PALMD    |  |  | METRNL     |
|  | PAM      |  |  | GTF2A2     |
|  | PAMR1    |  |  | EWSR1      |
|  | PAN2     |  |  | ZDHHC14    |
|  | PAN3     |  |  | VSIG10     |
|  | PANK3    |  |  | ZBTB40     |
|  | PANK4    |  |  | MALSU1     |

Table S6

|            |  |            |
|------------|--|------------|
| PAPOLA     |  | PPIL4      |
| PAPPA      |  | GSTK1      |
| PAPSS2     |  | RAB1A      |
| PAQR6      |  | YIF1A      |
| PAQR9      |  | IFT172     |
| PARD3      |  | AGGF1      |
| PARG       |  | FBLN1      |
| PARK7      |  | TMEM14B    |
| PARL       |  | VIM-AS1    |
| PARN       |  | ERP29      |
| PARP11     |  | TMCO1      |
| PARP12     |  | STK3       |
| PARP14     |  | ADAM20     |
| PARP15     |  | LINC02827  |
| PARP16     |  | NCDN       |
| PARP2      |  | SPCS2      |
| PARP3      |  | PCED1A     |
| PARP4      |  | BMI1       |
| PARP4P2    |  | WDFY3      |
| PARP8      |  | METTL1     |
| PARP9      |  | AC022106.1 |
| PART1      |  | YARS1      |
| PARVA      |  | AC010619.3 |
| PARVB      |  | NGDN       |
| PARVG      |  | LINC02842  |
| PASK       |  | ABCC10     |
| PATL1      |  | BORCS8     |
| PATL2      |  | SLC35A5    |
| PAX8-AS1   |  | PRR34-AS1  |
| PAX9       |  | NRBF2      |
| PAXB1      |  | CDH3       |
| PAXB1-AS1  |  | SLC35B1    |
| PAXX       |  | PLCB1      |
| PBRM1      |  | NPHP1      |
| PBX1       |  | NABP1      |
| PBX2       |  | SNHG22     |
| PBXIP1     |  | CEP68      |
| PCBD1      |  | AC092117.2 |
| PCBP1      |  | GMNN       |
| PCBP1-AS1  |  | TBX18      |
| PCBP2      |  | NRIP1      |
| PCBP4      |  | PITPNB     |
| PCCA       |  | BCR        |
| PCCB       |  | GFPT2      |
| PCDH1      |  | POF1B      |
| PCDH12     |  | H2BC13     |
| PCDHA11    |  | SNUPN      |
| PCDHGB5    |  | KLHL36     |
| PCED1A     |  | NUCB1      |
| PCED1B     |  | WWP1       |
| PCED1B-AS1 |  | RASA1      |
| PCGF2      |  | MTX3       |
| PCGF3      |  | BLACAT1    |
| PCGF5      |  | CD302      |
| PCID2      |  | LAMTOR2    |
| PCMT1      |  | ZNF316     |
| PCNX1      |  | LRPPRC     |
| PCNX2      |  | PCDHAC2    |
| PCNX3      |  | PRPF6      |
| PCP4L1     |  | URB1       |

Table S6

|  |           |  |  |              |
|--|-----------|--|--|--------------|
|  | PCSK9     |  |  | MED13L       |
|  | PCTP      |  |  | UCHL5        |
|  | PCYOX1    |  |  | DOP1A        |
|  | PCYT1A    |  |  | GDE1         |
|  | PCYT1B    |  |  | COL12A1      |
|  | PDCD11    |  |  | MAP3K4       |
|  | PDCD1LG2  |  |  | COMMD6       |
|  | PDCD2     |  |  | CRY1         |
|  | PDCD4     |  |  | MPP7         |
|  | PDCD4-AS1 |  |  | ATXN7L1      |
|  | PDCD5     |  |  | NDUFS6       |
|  | PDCD6     |  |  | SPDL1        |
|  | PDCL      |  |  | CLSPN        |
|  | PDCL3     |  |  | SH3RF2       |
|  | PDE11A    |  |  | TCF19        |
|  | PDE1C     |  |  | ATP7B        |
|  | PDE2A     |  |  | PAXB1-AS1    |
|  | PDE4B     |  |  | PHF19        |
|  | PDE4DIP   |  |  | AL353719.1   |
|  | PDE5A     |  |  | RABGGTA      |
|  | PDE6D     |  |  | STX1B        |
|  | PDE8B     |  |  | MAPKAP1      |
|  | PDE9A     |  |  | PAFAH2       |
|  | PDGFB     |  |  | COPZ1        |
|  | PDGFC     |  |  | NDOR1        |
|  | PDGFRA    |  |  | TUBB2A       |
|  | PDGFRB    |  |  | ACSL5        |
|  | PDGFRL    |  |  | ATP5MF-PTCD1 |
|  | PDIA4     |  |  | XPO1         |
|  | PDIA5     |  |  | KHSRP        |
|  | PDIA6     |  |  | RBM23        |
|  | PDK4      |  |  | POC1B-GALNT4 |
|  | PDLIM2    |  |  | DDX28        |
|  | PDLIM3    |  |  | GTF2E2       |
|  | PDLIM4    |  |  | BNIP5        |
|  | PDLIM5    |  |  | PCMTD1       |
|  | PDPK1     |  |  | RALGAPA1P1   |
|  | PDPN      |  |  | TEFM         |
|  | PDRG1     |  |  | TBX3         |
|  | PDS5A     |  |  | NAB1         |
|  | PDSS1     |  |  | RPN1         |
|  | PDXDC1    |  |  | AC073109.1   |
|  | PDXK      |  |  | CAPN15       |
|  | PDZD11    |  |  | H2AC15       |
|  | PDZD8     |  |  | ABI2         |
|  | PEAK1     |  |  | ZDHHC20      |
|  | PEAR1     |  |  | PPRC1        |
|  | PEBP1     |  |  | C3orf38      |
|  | PELI1     |  |  | RBMXL1       |
|  | PELO      |  |  | DYNLL1       |
|  | PELP1     |  |  | AL732366.1   |
|  | PEPD      |  |  | LMBR1L       |
|  | PER1      |  |  | CHST4        |
|  | PER2      |  |  | AC005090.1   |
|  | PER3      |  |  | LIMK2        |
|  | PES1      |  |  | SIRPA        |
|  | PEX1      |  |  | MSL3         |
|  | PEX11B    |  |  | ATP6V0E2     |
|  | PEX16     |  |  | MMP25-AS1    |
|  | PEX2      |  |  | PPM1A        |

Table S6

|         |  |  |             |
|---------|--|--|-------------|
| PEX5    |  |  | AC092279.1  |
| PFAS    |  |  | BCKDHB      |
| PFDN1   |  |  | FECH        |
| PFDN2   |  |  | PPAN        |
| PFDN5   |  |  | LAGE3       |
| PFDN6   |  |  | MANEA       |
| PFKFB4  |  |  | KCNK5       |
| PFKL    |  |  | COX6A1      |
| PFKM    |  |  | TKFC        |
| PFKP    |  |  | ARFIP1      |
| PFN1    |  |  | AC006064.6  |
| PGAM4   |  |  | SLC2A13     |
| PGAP3   |  |  | THAP6       |
| PGAP4   |  |  | NUDT5       |
| PGAP6   |  |  | OSBPL1A     |
| PGBD1   |  |  | MARK2       |
| PGBD4   |  |  | AL645608.8  |
| PGC     |  |  | RNASEL      |
| PGD     |  |  | ACSS2       |
| PGGHG   |  |  | AC135050.2  |
| PGLYRP1 |  |  | POLR2A      |
| PGM5    |  |  | GSK3A       |
| PHB     |  |  | CASP3       |
| PHB2    |  |  | BCCIP       |
| PHC1P1  |  |  | CNPPD1      |
| PHC2    |  |  | ARHGEF11    |
| PHETA2  |  |  | NHLRC2      |
| PHF10   |  |  | LINC01588   |
| PHF11   |  |  | ETV1        |
| PHF12   |  |  | RAB2A       |
| PHF13   |  |  | GLRX5       |
| PHF20   |  |  | ATXN7       |
| PHF20L1 |  |  | MIRLET7A1HG |
| PHF23   |  |  | RPS27A      |
| PHF5A   |  |  | AC022400.3  |
| PHF6    |  |  | BOC         |
| PHKB    |  |  | AC074050.2  |
| PHKG2   |  |  | AKAP7       |
| PHLDA1  |  |  | COA5        |
| PHLDA2  |  |  | PTPRZ1      |
| PHLDA3  |  |  | ATP5F1B     |
| PHLDB1  |  |  | AC093425.1  |
| PHLPP1  |  |  | THBS3       |
| PHLPP2  |  |  | FOKK1       |
| PHPT1   |  |  | CXCL6       |
| PHRF1   |  |  | SH3GLB2     |
| PHTF2   |  |  | QSOX1       |
| PI4K2A  |  |  | TROAP       |
| PI4K2B  |  |  | KRBA1       |
| PI4KA   |  |  | TERF2IP     |
| PI4KAP1 |  |  | AC009951.4  |
| PI4KAP2 |  |  | TRIM29      |
| PI4KB   |  |  | AC008074.2  |
| PIAS2   |  |  | DIAPH1      |
| PIAS3   |  |  | GALNT4      |
| PIEZO1  |  |  | RBAK        |
| PIGC    |  |  | RNU5D-1     |
| PIGL    |  |  | AC093512.2  |
| PIGO    |  |  | RFFL        |
| PIGR    |  |  | ELP2        |

Table S6

|  |         |  |            |
|--|---------|--|------------|
|  | PIGS    |  | SEPSECS    |
|  | PIGU    |  | OTUB1      |
|  | PIGV    |  | MEA1       |
|  | PIH1D1  |  | RYBP       |
|  | PIK3AP1 |  | UBA1       |
|  | PIK3C2B |  | TYSND1     |
|  | PIK3IP1 |  | FAM217B    |
|  | PIK3R1  |  | PHRF1      |
|  | PIK3R4  |  | RPA3       |
|  | PILRA   |  | HEATR1     |
|  | PIM1    |  | CNKSR1     |
|  | PIM2    |  | SLC66A3    |
|  | PIN4    |  | DCTN2      |
|  | PINX1   |  | MRPL18     |
|  | PIP     |  | CCDC186    |
|  | PIP4P1  |  | PKIB       |
|  | PIP4P2  |  | PDK3       |
|  | PIP5K1A |  | KIF21A     |
|  | PIR     |  | STMP1      |
|  | PISD    |  | BCKDK      |
|  | PITHD1  |  | ETS1       |
|  | PITPNC1 |  | IFNA21     |
|  | PITPNM1 |  | CLEC17A    |
|  | PITPNM2 |  | LINC02158  |
|  | PITRM1  |  | PANK3      |
|  | PITX1   |  | RAB11FIP4  |
|  | PJA1    |  | COG4       |
|  | PJA2    |  | SMYD3      |
|  | PKD2    |  | ELOVL3     |
|  | PKIA    |  | TCTEX1D2   |
|  | PKIG    |  | NPM1P27    |
|  | PKN1    |  | DDAH2      |
|  | PKN3    |  | ZNF175     |
|  | PKP4    |  | ATP6V0A4   |
|  | PLA2G15 |  | ULK4       |
|  | PLA2G4B |  | MIR300     |
|  | PLA2G7  |  | MAF1       |
|  | PLAAT2  |  | FGD4       |
|  | PLAAT3  |  | MPND       |
|  | PLAAT4  |  | POLR2E     |
|  | PLAC8   |  | SPINDOC    |
|  | PLAC9   |  | TCFL5      |
|  | PLAGL1  |  | MAP3K2     |
|  | PLAUR   |  | REEP6      |
|  | PLBD1   |  | DCTN5      |
|  | PLBD2   |  | BRWD1P2    |
|  | PLCB1   |  | IPPK       |
|  | PLCB2   |  | EIF4E      |
|  | PLCB3   |  | LAMA3      |
|  | PLCD1   |  | SLC5A3     |
|  | PLCG1   |  | SEC61G     |
|  | PLCG2   |  | RPL23A     |
|  | PLCL2   |  | AC090527.3 |
|  | PLD2    |  | RAB3D      |
|  | PLD5    |  | SIM2       |
|  | PLEC    |  | FLII       |
|  | PLEK    |  | AQP4       |
|  | PLEKHA2 |  | CRPPA      |
|  | PLEKHA3 |  | SYNGR1     |
|  | PLEKHA4 |  | RTKN2      |

Table S6

|  |         |  |  |            |
|--|---------|--|--|------------|
|  | PLEKHA5 |  |  | PLCD1      |
|  | PLEKHA7 |  |  | LMF2       |
|  | PLEKHB2 |  |  | GABPA      |
|  | PLEKHG1 |  |  | NAA25      |
|  | PLEKHG2 |  |  | ZCCHC8     |
|  | PLEKHG3 |  |  | CAVIN2     |
|  | PLEKHH2 |  |  | NUDT14     |
|  | PLEKHJ1 |  |  | CIP2A      |
|  | PLEKHM1 |  |  | RPAP1      |
|  | PLEKHM2 |  |  | TRAPPC2L   |
|  | PLEKHO1 |  |  | LINC02029  |
|  | PLEKHO2 |  |  | RB1        |
|  | PLGRKT  |  |  | RMDN1      |
|  | PLIN2   |  |  | KLF5       |
|  | PLK2    |  |  | AL021707.1 |
|  | PLK3    |  |  | TP53I11    |
|  | PLLP    |  |  | ATP13A4    |
|  | PLOD1   |  |  | AOC3       |
|  | PLP2    |  |  | CDKAL1     |
|  | PLPBP   |  |  | ELOVL5     |
|  | PLPP1   |  |  | ABCB10     |
|  | PLPP3   |  |  | CASP6      |
|  | PLPPR2  |  |  | ZNF484     |
|  | PLSCR1  |  |  | SRP19      |
|  | PLSCR4  |  |  | TWSG1      |
|  | PLXNA1  |  |  | AL096711.2 |
|  | PLXNA2  |  |  | C2CD4B     |
|  | PLXNA3  |  |  | FAM193B    |
|  | PLXNB1  |  |  | AC092803.1 |
|  | PLXNB2  |  |  | MIR3685    |
|  | PLXNC1  |  |  | COLEC11    |
|  | PLXND1  |  |  | AC131011.2 |
|  | PMEPA1  |  |  | PDK2       |
|  | PML     |  |  | UBE2S      |
|  | PMPCA   |  |  | TCAP       |
|  | PMPCB   |  |  | DXO        |
|  | PMS1    |  |  | CAPN12     |
|  | PMS2CL  |  |  | PSMD1      |
|  | PMS2P6  |  |  | MAL2       |
|  | PMS2P7  |  |  | RSL1D1     |
|  | PMVK    |  |  | MIR3142HG  |
|  | PNISR   |  |  | PLPP3      |
|  | PNLDC1  |  |  | DARS1      |
|  | PNN     |  |  | DIS3L      |
|  | PNP     |  |  | CHMP4C     |
|  | PNPLA2  |  |  | TIMM13     |
|  | PNPLA4  |  |  | KANK2      |
|  | PNPLA6  |  |  | DNAH5      |
|  | PNPO    |  |  | MICOS13    |
|  | PNPT1   |  |  | TMEM87B    |
|  | PNRC1   |  |  | SETD1A     |
|  | PODXL   |  |  | PRADC1     |
|  | POF1B   |  |  | EMC4       |
|  | POFUT2  |  |  | MIF4GD     |
|  | POGLUT1 |  |  | HNRNPH3    |
|  | POGZ    |  |  | PSMB6      |
|  | POLA1   |  |  | TNKS1BP1   |
|  | POLA2   |  |  | NUDT16L1   |
|  | POLB    |  |  | ZNF529     |
|  | POLD2   |  |  | ACVR1      |



Table S6

|  |          |  |  |            |
|--|----------|--|--|------------|
|  | POLDIP3  |  |  | CDC42BPG   |
|  | POLE     |  |  | GRAMD1B    |
|  | POLG     |  |  | WASHC4     |
|  | POLM     |  |  | MCFD2      |
|  | POLR1A   |  |  | ZBTB39     |
|  | POLR1D   |  |  | DCP1B      |
|  | POLR1E   |  |  | ANKRD45    |
|  | POLR2B   |  |  | NPL        |
|  | POLR2D   |  |  | IGSF3      |
|  | POLR2E   |  |  | DHX34      |
|  | POLR2G   |  |  | AL355987.3 |
|  | POLR2K   |  |  | SNORA74B   |
|  | POLR2L   |  |  | HMG20A     |
|  | POLR2M   |  |  | PRDM6      |
|  | POLR3C   |  |  | PITPNM3    |
|  | POLR3GL  |  |  | SPINT2     |
|  | POM121   |  |  | MGMT       |
|  | POM121C  |  |  | ACP1       |
|  | POMGNT1  |  |  | MAPK1      |
|  | POMT1    |  |  | AL358472.5 |
|  | POMT2    |  |  | ALDH16A1   |
|  | POMZP3   |  |  | PLXNA1     |
|  | POP4     |  |  | SERPINB6   |
|  | POP5     |  |  | GPRC5B     |
|  | POP7     |  |  | ITGB4      |
|  | POPDC3   |  |  | COP1       |
|  | POR      |  |  | AP000944.4 |
|  | POU2AF1  |  |  | L3MBTL3    |
|  | POU2F2   |  |  | CRACD      |
|  | POU6F1   |  |  | CCDC157    |
|  | PPA1     |  |  | STX7       |
|  | PPARA    |  |  | CLN5       |
|  | PPARD    |  |  | CDC123     |
|  | PPARG    |  |  | RBFOX2     |
|  | PPARGC1B |  |  | ABCA3      |
|  | PPDPF    |  |  | SLC8B1     |
|  | PPFIA1   |  |  | APEX1      |
|  | PPFIA4   |  |  | FAM86C2P   |
|  | PPFIBP2  |  |  | FAM210B    |
|  | PPHLN1   |  |  | AC011939.2 |
|  | PPIA     |  |  | LSM11      |
|  | PIIB     |  |  | RIC1       |
|  | PPID     |  |  | AL450992.2 |
|  | PIIE     |  |  | SIX1       |
|  | PIIG     |  |  | ZBTB32     |
|  | PIIH     |  |  | SPTB       |
|  | PPIL1    |  |  | AL645939.2 |
|  | PPIL4    |  |  | SLC49A4    |
|  | PPL      |  |  | LINC01215  |
|  | PPM1A    |  |  | KIF26B     |
|  | PPM1F    |  |  | ID4        |
|  | PPM1H    |  |  | MTCO3P11   |
|  | PPM1K    |  |  | LPXN       |
|  | PPM1M    |  |  | TMEM106A   |
|  | PPME1    |  |  | TMEM14A    |
|  | PPOX     |  |  | TINAGL1    |
|  | PPP1CA   |  |  | ASH1L-AS1  |
|  | PPP1R10  |  |  | GRM8       |
|  | PPP1R11  |  |  | ZNF394     |
|  | PPP1R12A |  |  | MTIF3      |

Table S6

|  |              |  |  |            |
|--|--------------|--|--|------------|
|  | PPP1R12B     |  |  | PPP2R5B    |
|  | PPP1R12C     |  |  | RARS2      |
|  | PPP1R13B     |  |  | SIAH1      |
|  | PPP1R14A     |  |  | MUC5AC     |
|  | PPP1R14B     |  |  | HES1       |
|  | PPP1R14B-AS1 |  |  | KCNQ3      |
|  | PPP1R15A     |  |  | AC108749.1 |
|  | PPP1R16B     |  |  | MTFR1L     |
|  | PPP1R18      |  |  | CIB2       |
|  | PPP1R2       |  |  | C5orf63    |
|  | PPP1R3C      |  |  | VCPKMT     |
|  | PPP1R8       |  |  | TRAK1      |
|  | PPP1R9A      |  |  | BEST3      |
|  | PPP1R9B      |  |  | ZZEF1      |
|  | PPP2CA       |  |  | MTMR2      |
|  | PPP2R2C      |  |  | GNAQ       |
|  | PPP2R2D      |  |  | AL163051.1 |
|  | PPP2R3C      |  |  | RAD52      |
|  | PPP2R5B      |  |  | FXD5       |
|  | PPP2R5D      |  |  | RAD54L2    |
|  | PPP3CC       |  |  | GNG10      |
|  | PPP3R1       |  |  | ACADSB     |
|  | PPP4C        |  |  | POLR2J     |
|  | PPP4R1       |  |  | KBTBD2     |
|  | PPP4R2       |  |  | SLC25A20   |
|  | PPP4R3A      |  |  | TRIM15     |
|  | PPP4R3B      |  |  | SETX       |
|  | PPP5C        |  |  | CDK5RAP2   |
|  | PPP6C        |  |  | PIR        |
|  | PPP6R2       |  |  | SNX25      |
|  | PPP6R3       |  |  | SMIM20     |
|  | PPRC1        |  |  | DOCK7      |
|  | PPTC7        |  |  | TMEM126B   |
|  | PQBP1        |  |  | MTCL1      |
|  | PRADC1       |  |  | AC242842.3 |
|  | PRAF2        |  |  | SDHC       |
|  | PRAME        |  |  | EFL1P1     |
|  | PRDM1        |  |  | PLXNB1     |
|  | PRDM11       |  |  | SERPINA1   |
|  | PRDM15       |  |  | MCM4       |
|  | PRDM2        |  |  | PTOV1      |
|  | PRDM4        |  |  | GEMIN8     |
|  | PRDX1        |  |  | TRAPPC6B   |
|  | PRDX2        |  |  | KIF13B     |
|  | PRDX5        |  |  | SDHD       |
|  | PRDX6        |  |  | PWP1       |
|  | PREB         |  |  | ILF2       |
|  | PRELID1      |  |  | CORO1B     |
|  | PRELID2      |  |  | AC005072.1 |
|  | PREPL        |  |  | SLC9A2     |
|  | PRICKLE2     |  |  | FAM126A    |
|  | PRKAB1       |  |  | AL161421.1 |
|  | PRKACB       |  |  | AC008517.1 |
|  | PRKAG2       |  |  | RPSA       |
|  | PRKAR1B      |  |  | AGBL2      |
|  | PRKAR2A      |  |  | TBC1D2B    |
|  | PRKCA        |  |  | CDCA8      |
|  | PRKCE        |  |  | NME2       |
|  | PRKCZ        |  |  | MIF        |
|  | PRKD1        |  |  | MAN2A1     |

Table S6

|  |         |  |  |            |
|--|---------|--|--|------------|
|  | PRKRIP1 |  |  | TAOK1      |
|  | PRKX    |  |  | PDE3B      |
|  | PRKY    |  |  | RRP7A      |
|  | PRMT1   |  |  | AP000944.2 |
|  | PRMT2   |  |  | NUDCD3     |
|  | PRMT5   |  |  | CALB2      |
|  | PRMT7   |  |  | NUBPL      |
|  | PRMT9   |  |  | TAF1C      |
|  | PRPF19  |  |  | SCRN1      |
|  | PRPF31  |  |  | ABHD15     |
|  | PRPF38A |  |  | GPX4       |
|  | PRPF38B |  |  | NUDCD2     |
|  | PRPF39  |  |  | ACTR6      |
|  | PRPF4   |  |  | ST7-OT4    |
|  | PRPF4B  |  |  | SSR2       |
|  | PRPF6   |  |  | PACSIN3    |
|  | PRPF8   |  |  | CYS1       |
|  | PRPS1   |  |  | ATAD2      |
|  | PRPS2   |  |  | ZBTB42     |
|  | PRPSAP2 |  |  | AAMP       |
|  | PRR13   |  |  | AC083973.1 |
|  | PRR13P5 |  |  | FLOT2      |
|  | PRR14   |  |  | JAZF1-AS1  |
|  | PRR14L  |  |  | REEP1      |
|  | PRR3    |  |  | AC090844.3 |
|  | PRRC1   |  |  | SZRD1      |
|  | PRRC2A  |  |  | DHRS3      |
|  | PRRG1   |  |  | MARF1      |
|  | PRRG4   |  |  | AL138963.2 |
|  | PRSS16  |  |  | AL590068.3 |
|  | PRSS23  |  |  | GSTO2      |
|  | PRSS8   |  |  | PDP1       |
|  | PRTG    |  |  | RRM2       |
|  | PRX     |  |  | AP001372.2 |
|  | PRXL2B  |  |  | ZNHIT2     |
|  | PSAP    |  |  | B4GALT6    |
|  | PSAT1   |  |  | FAM126B    |
|  | PSEN1   |  |  | CREG1      |
|  | PSEN2   |  |  | AC010336.8 |
|  | PSENEN  |  |  | TRAF3      |
|  | PSMA4   |  |  | STAT5A     |
|  | PSMA7   |  |  | EIF2B5     |
|  | PSMB1   |  |  | SCRIB      |
|  | PSMB10  |  |  | NBDY       |
|  | PSMB2   |  |  | FOXO3      |
|  | PSMB3   |  |  | AC008870.3 |
|  | PSMB4   |  |  | CLK2       |
|  | PSMB5   |  |  | EVI5       |
|  | PSMB7   |  |  | SERPINE1   |
|  | PSMB8   |  |  | GTSF1      |
|  | PSMB9   |  |  | UBE4A      |
|  | PSMC1   |  |  | ARHGEF39   |
|  | PSMC1P1 |  |  | B4GALNT3   |
|  | PSMC3   |  |  | BAP1       |
|  | PSMC4   |  |  | KIF1A      |
|  | PSMC5   |  |  | CCNH       |
|  | PSMC6   |  |  | WASH3P     |
|  | PSMD1   |  |  | TIMM21     |
|  | PSMD11  |  |  | SLC20A1    |
|  | PSMD13  |  |  | CTDSP1     |

Table S6

|  |           |  |                 |
|--|-----------|--|-----------------|
|  | PSMD2     |  | ZNF783          |
|  | PSMD3     |  | VAMP2           |
|  | PSMD4     |  | SUPT16H         |
|  | PSMD5     |  | PALM2AKAP2      |
|  | PSMD6     |  | TOP3A           |
|  | PSMD7     |  | AC092120.1      |
|  | PSMD8     |  | FAM102B         |
|  | PSME3     |  | S100A10         |
|  | PSMF1     |  | CCNY            |
|  | PSMG2     |  | AP000845.1      |
|  | PSPC1-AS2 |  | AKAP6           |
|  | PSTPIP2   |  | LINC01126       |
|  | PTAFR     |  | C14orf132       |
|  | PTBP1     |  | COQ9            |
|  | PTBP2     |  | FBXL6           |
|  | PTBP3     |  | BMP8B           |
|  | PTCD3     |  | ICA1            |
|  | PTDSS2    |  | ASRGL1          |
|  | PTEN      |  | TBL1X           |
|  | PTENP1    |  | C19orf54        |
|  | PTGER2    |  | ACADVL          |
|  | PTGIS     |  | NF2             |
|  | PTGR1     |  | INSL4           |
|  | PTH1R     |  | YY1AP1          |
|  | PTK2      |  | H2AC11          |
|  | PTK2B     |  | USP21           |
|  | PTK6      |  | CLDND1          |
|  | PTK7      |  | FEZ2            |
|  | PTMAP5    |  | LHFPL2          |
|  | PTMS      |  | CLDN12          |
|  | PTOV1     |  | ZNF605          |
|  | PTP4A1    |  | RABGAP1         |
|  | PTP4A3    |  | CHST10          |
|  | PTPA      |  | TOMM5           |
|  | PTPDC1    |  | TMEM53          |
|  | PTPN1     |  | AL118516.1      |
|  | PTPN13    |  | ANKHD1-EIF4EBP3 |
|  | PTPN2     |  | MCTP1           |
|  | PTPN21    |  | KDEL3           |
|  | PTPN3     |  | NUP43           |
|  | PTPN6     |  | TRMT2B          |
|  | PTPN9     |  | C19orf53        |
|  | PTPRB     |  | AC147651.1      |
|  | PTPRC     |  | ME2P1           |
|  | PTPRD     |  | AL359878.1      |
|  | PTPRE     |  | HEATR5B         |
|  | PTPRG     |  | TRPV4           |
|  | PTPRK     |  | TRMT44          |
|  | PTPRM     |  | AL161454.1      |
|  | PTPRN2    |  | NAE1            |
|  | PTPRZ1    |  | DHTKD1          |
|  | PTS       |  | SH3YL1          |
|  | PTTG1IP   |  | PTCD3           |
|  | PUDP      |  | RNVU1-30        |
|  | PUF60     |  | RNU6-33P        |
|  | PUM2      |  | TPRG1L          |
|  | PUM3      |  | MEF2A           |
|  | PURPL     |  | AL354920.1      |
|  | PUS1      |  | HNRNPUL2-BSCL2  |
|  | PVR       |  | SLC37A4         |

Table S6

|  |           |  |  |              |
|--|-----------|--|--|--------------|
|  | PWP2      |  |  | CSNK1A1      |
|  | PWWP2A    |  |  | SNTA1        |
|  | PWWP3A    |  |  | GABPB1       |
|  | PWWP3B    |  |  | SRP9P1       |
|  | PXDC1     |  |  | SURF1        |
|  | PXDN      |  |  | ZNF519       |
|  | PXK       |  |  | TP53RK       |
|  | PXN       |  |  | ABCB1        |
|  | PYCR2     |  |  | RPL7P9       |
|  | PYGB      |  |  | SMG5         |
|  | PYGL      |  |  | PRUNE2       |
|  | PYGO2     |  |  | IFNA8        |
|  | PYROXD1   |  |  | HRC          |
|  | QARS1     |  |  | CEP112       |
|  | QKI       |  |  | MIR3190      |
|  | QPCT      |  |  | AP000311.1   |
|  | QPCTL     |  |  | AC116366.2   |
|  | QRICH1    |  |  | AC002377.1   |
|  | QSER1     |  |  | CDKL5        |
|  | QSOX1     |  |  | GNAI3        |
|  | QSOX2     |  |  | RPS29P14     |
|  | QTRT1     |  |  | AC092958.3   |
|  | R3HCC1    |  |  | PPP1R3B      |
|  | R3HDM2    |  |  | BAD          |
|  | R3HDM4    |  |  | LEPR         |
|  | RAB10     |  |  | CSGALNACT1   |
|  | RAB11B    |  |  | PKD1L1       |
|  | RAB11FIP1 |  |  | BRIP1        |
|  | RAB11FIP3 |  |  | PEX13        |
|  | RAB11FIP5 |  |  | AP002992.1   |
|  | RAB13     |  |  | TMEM256      |
|  | RAB15     |  |  | IL17RD       |
|  | RAB17     |  |  | ACAD9        |
|  | RAB1B     |  |  | SLC35E2B     |
|  | RAB20     |  |  | MPST         |
|  | RAB21     |  |  | SLC6A13      |
|  | RAB24     |  |  | MRPS21       |
|  | RAB25     |  |  | BLM          |
|  | RAB27A    |  |  | SAFB         |
|  | RAB29     |  |  | NSFL1C       |
|  | RAB2B     |  |  | MIA          |
|  | RAB30     |  |  | LINC00326    |
|  | RAB32     |  |  | TRPA1        |
|  | RAB33B    |  |  | GRIK5        |
|  | RAB34     |  |  | PDE4D        |
|  | RAB35     |  |  | SMIM19       |
|  | RAB3GAP2  |  |  | STX16-NPEPL1 |
|  | RAB40B    |  |  | MIR5047      |
|  | RAB40C    |  |  | ZNF185       |
|  | RAB4A     |  |  | TLCD2        |
|  | RAB4B     |  |  | ACOT9        |
|  | RAB5C     |  |  | STK17A       |
|  | RAB6A     |  |  | RPSAP58      |
|  | RAB6C     |  |  | CHID1        |
|  | RAB7A     |  |  | HSPE1P11     |
|  | RAB7B     |  |  | ATG12        |
|  | RAB8A     |  |  | CCDC69       |
|  | RAB8B     |  |  | MOCS3        |
|  | RABAC1    |  |  | SNORA28      |
|  | RABGAP1   |  |  | MAML2        |

Table S6

|  |          |  |            |
|--|----------|--|------------|
|  | RABGAP1L |  | LINC01271  |
|  | RABGGTA  |  | AL731571.1 |
|  | RABIF    |  | MTOR       |
|  | RABL2A   |  | PLEKHG3    |
|  | RABL3    |  | DPH2       |
|  | RABL6    |  | C1QTNF1    |
|  | RAC2     |  | CRKL       |
|  | RACK1    |  | AL137781.1 |
|  | RAD18    |  | AL160408.2 |
|  | RAD23A   |  | AP001062.2 |
|  | RAD54L2  |  | FAM83F     |
|  | RAE1     |  | AP1S3      |
|  | RAET1G   |  | ANKMY1     |
|  | RAET1L   |  | AC067968.1 |
|  | RAF1     |  | LGALS1     |
|  | RAI2     |  | ZNF862     |
|  | RALB     |  | PEX2       |
|  | RALBP1   |  | H2AC16     |
|  | RALGAPA2 |  | LYPD3      |
|  | RALGAPB  |  | TRIP12     |
|  | RALGDS   |  | B4GALT3    |
|  | RALGPS2  |  | MYL5       |
|  | RALY     |  | RSRP1      |
|  | RAN      |  | AC004264.1 |
|  | RANBP1   |  | ART3       |
|  | RANBP10  |  | STEAP2     |
|  | RANBP3   |  | PTMS       |
|  | RANBP9   |  | SGMS1-AS1  |
|  | RANGAP1  |  | TP53INP2   |
|  | RAP1A    |  | PTMAP2     |
|  | RAP2C    |  | LRRCC1     |
|  | RAPGEF1  |  | DNAL1      |
|  | RAPGEF2  |  | PPCDC      |
|  | RAPGEF3  |  | UCP2       |
|  | RAPGEF5  |  | P4HTM      |
|  | RAPGEFL1 |  | EIF2B1     |
|  | RASA1    |  | AC092868.3 |
|  | RASA3    |  | AGAP1      |
|  | RASA4    |  | WNK3       |
|  | RASA4B   |  | EIF2AK3    |
|  | RASD2    |  | TMEM254    |
|  | RASGEF1B |  | NAGA       |
|  | RASGRF2  |  | CEP63      |
|  | RASIP1   |  | GSE1       |
|  | RASL11A  |  | FEZ1       |
|  | RASL12   |  | ABCE1      |
|  | RASSF1   |  | PNKD       |
|  | RASSF10  |  | PIK3C3     |
|  | RASSF2   |  | YKT6       |
|  | RASSF7   |  | GRK3       |
|  | RBBP4    |  | NUTF2      |
|  | RBBP6    |  | ANXA2R     |
|  | RBBP8    |  | CC2D2A     |
|  | RBBP9    |  | AC007780.1 |
|  | RBCK1    |  | ZBTB41     |
|  | RBFOX2   |  | FAM189B    |
|  | RBM10    |  | MPHOSPH8   |
|  | RBM11    |  | NCL        |
|  | RBM12    |  | HAUS1      |
|  | RBM14    |  | HENMT1     |

Table S6

|  |         |  |  |            |
|--|---------|--|--|------------|
|  | RBM15B  |  |  | UQCRC2     |
|  | RBM17   |  |  | SCOC       |
|  | RBM19   |  |  | ZC3H3      |
|  | RBM22   |  |  | PSMD11     |
|  | RBM26   |  |  | PNRC2      |
|  | RBM28   |  |  | RBM8A      |
|  | RBM3    |  |  | AC011448.1 |
|  | RBM33   |  |  | LINC01285  |
|  | RBM34   |  |  | GOLPH3     |
|  | RBM39   |  |  | TRPC1      |
|  | RBM43   |  |  | ENTPD3     |
|  | RBM47   |  |  | TTI2       |
|  | RBM5    |  |  | DUS3L      |
|  | RBM6    |  |  | PHF12      |
|  | RBM7    |  |  | PLD3       |
|  | RBMS1   |  |  | UQCR11     |
|  | RBMX2   |  |  | QPCT       |
|  | RBMXL1  |  |  | COX19      |
|  | RBP4    |  |  | C8orf31    |
|  | RBPMS   |  |  | LRIG2      |
|  | RBSN    |  |  | MCM8       |
|  | RBX1    |  |  | CNKSR2     |
|  | RC3H2   |  |  | NUPR1      |
|  | RCAN1   |  |  | RFPL4A     |
|  | RCBTB1  |  |  | AC019117.3 |
|  | RCBTB2  |  |  | AL035460.1 |
|  | RCC1L   |  |  | LDC1P      |
|  | RCC2    |  |  | AC009949.1 |
|  | RCE1    |  |  | GMDS       |
|  | RCOR1   |  |  | NFATC2     |
|  | RDH10   |  |  | MMP15      |
|  | RDH11   |  |  | MZT2A      |
|  | RDH14   |  |  | SNHG25     |
|  | RDM1    |  |  | NEK7       |
|  | RDX     |  |  | TM9SF2     |
|  | REC8    |  |  | SPAST      |
|  | RECK    |  |  | RNVU1-25   |
|  | RECQL4  |  |  | DUT        |
|  | REL     |  |  | CDK11B     |
|  | RENBP   |  |  | COPRS      |
|  | REPS2   |  |  | COX4I1     |
|  | RERE    |  |  | COPS5      |
|  | RESF1   |  |  | BLOC1S1    |
|  | REST    |  |  | MT1X       |
|  | RETREG1 |  |  | EMB        |
|  | RETREG3 |  |  | POMGNT1    |
|  | RETSAT  |  |  | NDFIP1     |
|  | REV1    |  |  | SLC25A10   |
|  | REX1BD  |  |  | NEK10      |
|  | REXO4   |  |  | BTBD2      |
|  | RFC1    |  |  | IGHE       |
|  | RFLNB   |  |  | SDSL       |
|  | RFNG    |  |  | AP1S2      |
|  | RFT1    |  |  | GLG1       |
|  | RFTN1   |  |  | FOXP2      |
|  | RFX1    |  |  | ANKHD1     |
|  | RFX7    |  |  | ARHGAP17   |
|  | RFXANK  |  |  | PCNA       |
|  | RGCC    |  |  | TJP3       |
|  | RGL1    |  |  | SETD1B     |

Table S6

|           |  |  |            |
|-----------|--|--|------------|
| RGL2      |  |  | PTN        |
| RGL4      |  |  | RBM25      |
| RGMB      |  |  | PRPS1      |
| RGP1      |  |  | OMA1       |
| RGPD1     |  |  | GPC1       |
| RGPD2     |  |  | DHX29      |
| RGPD3     |  |  | LINC01534  |
| RGPD5     |  |  | MRPS34     |
| RGPD6     |  |  | RASSF4     |
| RGPD8     |  |  | LIPG       |
| RGS12     |  |  | RASSF6     |
| RGS18     |  |  | RALGPS1    |
| RGS2      |  |  | NFATC3     |
| RGS3      |  |  | IGBP1      |
| RGS4      |  |  | ETNK1      |
| RGSL1     |  |  | CD99P1     |
| RHBDD1    |  |  | RNA5S9     |
| RHBDD2    |  |  | ZNF720     |
| RHBDF1    |  |  | TCF7L2     |
| RHBDF2    |  |  | PLEKHN1    |
| RHOA      |  |  | ERO1A      |
| RHOB      |  |  | NBPF26     |
| RHOC      |  |  | TOR3A      |
| RHOG      |  |  | TPR        |
| RHOH      |  |  | CACUL1     |
| RHOJ      |  |  | AC105219.1 |
| RIBC1     |  |  | DDX42      |
| RIC1      |  |  | MORN2      |
| RIC8B     |  |  | AC025431.1 |
| RICTOR    |  |  | AC007032.1 |
| RILPL1    |  |  | DOK4       |
| RIMKLB    |  |  | PPOX       |
| RIMS2     |  |  | EMSY       |
| RIMS3     |  |  | SPR        |
| RIN2      |  |  | PGF        |
| RING1     |  |  | MAK        |
| RIOK2     |  |  | TOMM70     |
| RIOK3     |  |  | ECPAS      |
| RIPK1     |  |  | RANBP3     |
| RIPK2     |  |  | RPAIN      |
| RIPOR1    |  |  | AP003419.1 |
| RIPOR2    |  |  | TMEM38B    |
| RIPOR3    |  |  | UBR5       |
| RIPPLY3   |  |  | NDUFB9     |
| RLF       |  |  | VPS39      |
| RLIM      |  |  | GARS1      |
| RMDN1     |  |  | SKA3       |
| RMDN3     |  |  | ARID1B     |
| RMND1     |  |  | CENPM      |
| RMND5A    |  |  | DDX50      |
| RMND5B    |  |  | IL20RB     |
| RN7SL396P |  |  | CCT2       |
| RN7SL689P |  |  | LRFN1      |
| RNA5S9    |  |  | ST6GALNAC2 |
| RNA5SP141 |  |  | LRRC41     |
| RNA5SP145 |  |  | CHKB       |
| RNA5SP225 |  |  | ENTPD6     |
| RNA5SP298 |  |  | ZNF827     |
| RNA5SP481 |  |  | SPC24      |
| RNASE2    |  |  | TCEA3      |



Table S6

|  |          |  |  |             |
|--|----------|--|--|-------------|
|  | RNASEH1  |  |  | URB2        |
|  | RNASEH2B |  |  | ZMYM1       |
|  | RNASEH2C |  |  | UBE2G1      |
|  | RNASEL   |  |  | SIDT1       |
|  | RND1     |  |  | DLG1        |
|  | RND3     |  |  | LRCH4       |
|  | RNF113A  |  |  | RAP1GDS1    |
|  | RNF121   |  |  | SYNM        |
|  | RNF122   |  |  | DDX24       |
|  | RNF13    |  |  | NDUFB8      |
|  | RNF139   |  |  | LURAP1L-AS1 |
|  | RNF144A  |  |  | AC034236.1  |
|  | RNF144B  |  |  | NPM3        |
|  | RNF145   |  |  | CHRNA7      |
|  | RNF149   |  |  | CASR        |
|  | RNF152   |  |  | MARC1       |
|  | RNF166   |  |  | TSPAN18     |
|  | RNF167   |  |  | NLRP4       |
|  | RNF168   |  |  | OR52K1      |
|  | RNF170   |  |  | AC092168.1  |
|  | RNF175   |  |  | AC022092.1  |
|  | RNF185   |  |  | HSPB9       |
|  | RNF19B   |  |  | ADPGK-AS1   |
|  | RNF20    |  |  | AC010501.2  |
|  | RNF213   |  |  | AC011369.2  |
|  | RNF216   |  |  | ARMC10P1    |
|  | RNF216P1 |  |  | CAVIN4      |
|  | RNF220   |  |  | POP5        |
|  | RNF224   |  |  | ZNF594      |
|  | RNF227   |  |  | ZHX3        |
|  | RNF25    |  |  | ANAPC15     |
|  | RNF34    |  |  | BMS1P4      |
|  | RNF4     |  |  | AC015813.2  |
|  | RNF40    |  |  | GRM5        |
|  | RNF44    |  |  | ERCC6L      |
|  | RNF5     |  |  | TIMM8B      |
|  | RNF8     |  |  | LONRF3      |
|  | RNGTT    |  |  | UBR3        |
|  | RNH1     |  |  | SNORA47     |
|  | RNMT     |  |  | HMGB1P3     |
|  | RNPEP    |  |  | CNTF        |
|  | RNPS1    |  |  | TMEM65      |
|  | RNU4-1   |  |  | STK24-AS1   |
|  | RNU4ATAC |  |  | DCUN1D4     |
|  | RNU5A-1  |  |  | NANS        |
|  | RNU6-1   |  |  | LINC00240   |
|  | RNU6-2   |  |  | SNORC       |
|  | RNU6-36P |  |  | FANCF       |
|  | RNU6-37P |  |  | HABP2       |
|  | RNU6-5P  |  |  | ALKBH5      |
|  | RNU6-9   |  |  | AL034430.1  |
|  | RNU6ATAC |  |  | MBOAT7      |
|  | RNVU1-28 |  |  | IL17RC      |
|  | RNVU1-2A |  |  | PQBP1       |
|  | RNVU1-31 |  |  | SOX13       |
|  | ROBO3    |  |  | ZNF664      |
|  | ROBO4    |  |  | RPS26       |
|  | ROCK1    |  |  | ZNF777      |
|  | ROCK2    |  |  | RPL23AP82   |
|  | ROMO1    |  |  | CSNK1G1     |

Table S6

|  |               |  |  |            |
|--|---------------|--|--|------------|
|  | RORA          |  |  | WNK1       |
|  | RP11-173M1.8  |  |  | SNORD15B   |
|  | RP11-175O19.4 |  |  | LINC02035  |
|  | RP11-206L10.3 |  |  | IPO9       |
|  | RP11-211G3.2  |  |  | PHLDA2     |
|  | RP11-401P9.4  |  |  | COPB1      |
|  | RP11-435O5.2  |  |  | AC120024.1 |
|  | RP11-474N8.8  |  |  | SUPT20H    |
|  | RP11-485G4.2  |  |  | AC090114.3 |
|  | RP11-680G24.5 |  |  | TBC1D9B    |
|  | RP1-168P16.2  |  |  | CCL22      |
|  | RP11-706O15.3 |  |  | LINC00511  |
|  | RP11-706O15.5 |  |  | EXOC6B     |
|  | RP1-178F10.3  |  |  | AC019186.1 |
|  | RP11-872J21.5 |  |  | CSF2RA     |
|  | RP11-89K10.1  |  |  | SLC39A1    |
|  | RP1-71H24.6   |  |  | YES1       |
|  | RP2           |  |  | SEC11A     |
|  | RP3-323A16.1  |  |  | RPUSD1     |
|  | RP3-368A4.5   |  |  | MORC3      |
|  | RP5-1039K5.19 |  |  | CDC6       |
|  | RP9P          |  |  | NDUFA3     |
|  | RPA1          |  |  | PROM2      |
|  | RPA2          |  |  | CINP       |
|  | RPA3          |  |  | TOX4       |
|  | RPAIN         |  |  | VPS9D1-AS1 |
|  | RPAP2         |  |  | ENSA       |
|  | RPAP3         |  |  | AC016405.1 |
|  | RPGR          |  |  | C2-AS1     |
|  | RPH3A         |  |  | MAP2K5     |
|  | RPH3AL        |  |  | LINC00973  |
|  | RPIA          |  |  | C1orf198   |
|  | RPL10         |  |  | FASTKD1    |
|  | RPL10A        |  |  | CDC42BPB   |
|  | RPL10P16      |  |  | EIF3H      |
|  | RPL10P3       |  |  | STN1       |
|  | RPL10P6       |  |  | CROT       |
|  | RPL12         |  |  | PINK1      |
|  | RPL12P4       |  |  | KIAA0408   |
|  | RPL13         |  |  | RFC4       |
|  | RPL13A        |  |  | LRRC75B    |
|  | RPL13AP20     |  |  | ARRB1      |
|  | RPL13AP25     |  |  | WDR46      |
|  | RPL13AP5      |  |  | SEPTIN4    |
|  | RPL13AP7      |  |  | CYP21A2    |
|  | RPL14         |  |  | HSPA14     |
|  | RPL15         |  |  | AL390719.1 |
|  | RPL15P2       |  |  | FGF18      |
|  | RPL18         |  |  | MTMR11     |
|  | RPL18A        |  |  | CDR2       |
|  | RPL19         |  |  | TRIM34     |
|  | RPL21         |  |  | SCAND2P    |
|  | RPL22P1       |  |  | PJA1       |
|  | RPL23AP53     |  |  | TWNK       |
|  | RPL23AP61     |  |  | ZNF574     |
|  | RPL24         |  |  | MED12      |
|  | RPL26         |  |  | ALAS1      |
|  | RPL26P19      |  |  | MCUR1      |
|  | RPL3          |  |  | UBB        |
|  | RPL31         |  |  | AC005258.1 |

Table S6

|  |           |  |  |            |
|--|-----------|--|--|------------|
|  | RPL31P63  |  |  | MAT2A      |
|  | RPL32     |  |  | TBC1D4     |
|  | RPL32P3   |  |  | DAD1       |
|  | RPL34     |  |  | COLEC10    |
|  | RPL34P18  |  |  | TACC2      |
|  | RPL35A    |  |  | CDS1       |
|  | RPL36     |  |  | EPS15      |
|  | RPL36AL   |  |  | NIBAN1     |
|  | RPL36AP26 |  |  | CDH2       |
|  | RPL37P2   |  |  | CPSF1      |
|  | RPL38     |  |  | THRB-IT1   |
|  | RPL39     |  |  | CCDC124    |
|  | RPL39P3   |  |  | UGT2A3     |
|  | RPL4      |  |  | LINC01002  |
|  | RPL41P2   |  |  | ZFHX4      |
|  | RPL5      |  |  | RBM7       |
|  | RPL6      |  |  | ZNF281     |
|  | RPL6P27   |  |  | FBXW7      |
|  | RPL7      |  |  | ZNF649     |
|  | RPL7A     |  |  | USP46      |
|  | RPL7AP66  |  |  | TCF3P1     |
|  | RPL7P6    |  |  | CIAPIN1    |
|  | RPL7P9    |  |  | H2AC5P     |
|  | RPL8      |  |  | AL355377.1 |
|  | RPL9      |  |  | SERGEF     |
|  | RPL9P29   |  |  | BDNF-AS    |
|  | RPL9P7    |  |  | CREB3L4    |
|  | RPLP0     |  |  | NPC1L1     |
|  | RPLP1     |  |  | MIIP       |
|  | RPLP1P6   |  |  | CYP20A1    |
|  | RPLP2     |  |  | DERL1      |
|  | RPN1      |  |  | CFAP298    |
|  | RPP25     |  |  | ZGPAT      |
|  | RPRD1A    |  |  | CALCA      |
|  | RPRD1B    |  |  | CAPZA1     |
|  | RPRD2     |  |  | ZFYVE27    |
|  | RPS10     |  |  | ALG5       |
|  | RPS11P5   |  |  | ZFP41      |
|  | RPS13     |  |  | RIPOR1     |
|  | RPS13P2   |  |  | PLSCR2     |
|  | RPS14     |  |  | LYPLA1     |
|  | RPS15A    |  |  | LINC01089  |
|  | RPS15AP1  |  |  | ST6GALNAC1 |
|  | RPS16     |  |  | MRPS5      |
|  | RPS18     |  |  | AC068338.2 |
|  | RPS19     |  |  | APOM       |
|  | RPS19BP1  |  |  | TMED8      |
|  | RPS23     |  |  | ZC3H12D    |
|  | RPS23P8   |  |  | AL805961.1 |
|  | RPS24     |  |  | ANKRD36C   |
|  | RPS24P8   |  |  | AC104472.1 |
|  | RPS26P11  |  |  | CLASRP     |
|  | RPS26P15  |  |  | FADD       |
|  | RPS26P31  |  |  | DMTF1      |
|  | RPS26P47  |  |  | COQ10B     |
|  | RPS27     |  |  | MAP7       |
|  | RPS27A    |  |  | CD163      |
|  | RPS27P29  |  |  | CREB3L2    |
|  | RPS28     |  |  | TOMM7      |
|  | RPS29     |  |  | TMSB4XP8   |

Table S6

|  |             |  |            |
|--|-------------|--|------------|
|  | RPS2P35     |  | ZSCAN20    |
|  | RPS2P5      |  | CMTM7      |
|  | RPS2P55     |  | SSH3       |
|  | RPS3        |  | LAPTM4A    |
|  | RPS3A       |  | ABLIM3     |
|  | RPS5        |  | RALGAPA2   |
|  | RPS6        |  | THAP1      |
|  | RPS6KA2     |  | TBC1D9     |
|  | RPS6KA5     |  | HTR3E      |
|  | RPS6KA6     |  | WDR5B      |
|  | RPS6KB1     |  | ADAMTSL2   |
|  | RPS6KB2     |  | TAF9B      |
|  | RPS6KC1     |  | ZBTB33     |
|  | RPS7P1      |  | TICRR      |
|  | RPS7P10     |  | AC067945.1 |
|  | RPS7P11     |  | ANGPTL1    |
|  | RPS8        |  | SYNJ2BP    |
|  | RPS9        |  | RN7SKP9    |
|  | RPSA        |  | TMEM236    |
|  | RPSAP12     |  | ARL15      |
|  | RPSAP4      |  | FZD1       |
|  | RPSAP47     |  | RANBP6     |
|  | RPSAP54     |  | EPHB4      |
|  | RPTOR       |  | TXN2       |
|  | RPUSD2      |  | SYNRG      |
|  | RRAD        |  | AC073508.2 |
|  | RRAS        |  | BBS2       |
|  | RRAS2       |  | TOMM6      |
|  | RRBP1       |  | LINC01467  |
|  | RREB1       |  | AJ003147.1 |
|  | RRM2        |  | CCL4       |
|  | RRN3        |  | SGMS2      |
|  | RRP1        |  | DDX47      |
|  | RRP12       |  | CEP41      |
|  | RRP36       |  | ZSWIM4     |
|  | RRP7A       |  | NDUFB11    |
|  | RRP7BP      |  | AF127936.1 |
|  | RRP9        |  | EXD2       |
|  | RSAD1       |  | BACE1-AS   |
|  | RSAD2       |  | CLOCK      |
|  | RSBN1L      |  | GGT1       |
|  | RSF1        |  | HYKK       |
|  | RSPO3       |  | TTPAL      |
|  | RSPRY1      |  | PHF10      |
|  | RSRC2       |  | KCNS1      |
|  | RTCB        |  | SLC25A36   |
|  | RTF1        |  | LINC01226  |
|  | RTKN        |  | LITAF      |
|  | RTKN2       |  | BICD1      |
|  | RTL10       |  | EID2B      |
|  | RTL5        |  | FADS3      |
|  | RTL8A       |  | SPDYA      |
|  | RTN3        |  | GALNT14    |
|  | RTN4        |  | DKK3       |
|  | RTP4        |  | PYCR1      |
|  | RUBCN       |  | KIF13A     |
|  | RUFY2       |  | ZBED9      |
|  | RUFY3       |  | LIMD2      |
|  | RUNDC3A-AS1 |  | UNC13B     |
|  | RUSC2       |  | NUP107     |

Table S6

|  |            |  |  |             |
|--|------------|--|--|-------------|
|  | RUVBL2     |  |  | CLCN5       |
|  | RWDD4      |  |  | CISD2       |
|  | RXRA       |  |  | EI24        |
|  | RXRB       |  |  | PRSS8       |
|  | RYK        |  |  | SLC7A5P1    |
|  | S100A11    |  |  | SPATA6      |
|  | S100A12    |  |  | SF3B5       |
|  | S100A13    |  |  | INO80B-WBP1 |
|  | S100A14    |  |  | SNORA63B    |
|  | S100A16    |  |  | LMBRD1      |
|  | S100A2     |  |  | MLX         |
|  | S100A8     |  |  | MAPK8IP2    |
|  | S100A9     |  |  | NSMCE1      |
|  | S100P      |  |  | VEGFB       |
|  | S100PBP    |  |  | TAGLN2P1    |
|  | SAA1       |  |  | AC037459.2  |
|  | SAA2       |  |  | PHF20       |
|  | SACS       |  |  | SNX30       |
|  | SAE1       |  |  | CTSZ        |
|  | SAFB       |  |  | KLHL15      |
|  | SAFB2      |  |  | SNX11       |
|  | SAMD4A     |  |  | ABCA12      |
|  | SAMD9      |  |  | TTLL5       |
|  | SAMD9L     |  |  | ING1        |
|  | SAMHD1     |  |  | ZNF202      |
|  | SAMM50     |  |  | KIF22       |
|  | SAP18      |  |  | AC092073.1  |
|  | SAP30      |  |  | ERCC6       |
|  | SAP30BP    |  |  | CYREN       |
|  | SAP30L     |  |  | UPF2        |
|  | SAR1B      |  |  | SCYL1       |
|  | SARAF      |  |  | FAM81A      |
|  | SARS1      |  |  | AC008581.2  |
|  | SART1      |  |  | ICAM3       |
|  | SASH1      |  |  | VAMP7       |
|  | SAT1       |  |  | SPTAN1      |
|  | SBDSP1     |  |  | CASZ1       |
|  | SBF1       |  |  | EIF1        |
|  | SBNO1      |  |  | SNORA16A    |
|  | SC5D       |  |  | SNORA16A    |
|  | SCAF11     |  |  | TMED2-DT    |
|  | SCAF4      |  |  | KRT8        |
|  | SCAMP1-AS1 |  |  | NCF2        |
|  | SCAMP3     |  |  | SNHG26      |
|  | SCAND1     |  |  | MANSC1      |
|  | SCAP       |  |  | MYBPC1      |
|  | SCARA3     |  |  | AL139100.2  |
|  | SCARB1     |  |  | SNX6        |
|  | SCARB2     |  |  | CDC20B      |
|  | SCD5       |  |  | AC139491.2  |
|  | SCDP1      |  |  | AC006065.4  |
|  | SCGB1A1    |  |  | C20orf141   |
|  | SCLT1      |  |  | AC098934.4  |
|  | SCMH1      |  |  | ZFP30       |
|  | SCML1      |  |  | PARM1       |
|  | SCN2A      |  |  | AC092747.2  |
|  | SCN4B      |  |  | CSPG5       |
|  | SCN9A      |  |  | ADNP2       |
|  | SCNN1B     |  |  | DCUN1D3     |
|  | SCNN1G     |  |  | TMEM33      |

Table S6

|           |  |            |
|-----------|--|------------|
| SCO1      |  | SFXN2      |
| SCOC-AS1  |  | CPAMD8     |
| SCRN1     |  | CEP162     |
| SCRN2     |  | AL365181.2 |
| SCYL1     |  | AC005899.5 |
| SCYL2     |  | ARFGAP2    |
| SDAD1     |  | ZYG11B     |
| SDAD1P1   |  | EPDR1      |
| SDC3      |  | BYSL       |
| SDCBP     |  | MAP1S      |
| SDCCAG8   |  | H3C4       |
| SDE2      |  | MSN        |
| SDF2L1    |  | ABTB1      |
| SDHA      |  | RNVU1-21   |
| SDHAF1    |  | DTX3       |
| SDHAF2    |  | AC012513.3 |
| SDHAF3    |  | TMEM187    |
| SDHAP1    |  | LONRF2     |
| SDHB      |  | INTS8      |
| SDHD      |  | ZFYVE1     |
| SEC13     |  | SERTAD4    |
| SEC16A    |  | NOS3       |
| SEC22B    |  | LINC01003  |
| SEC22C    |  | RFPL2      |
| SEC23A    |  | MXI1       |
| SEC23IP   |  | OGA        |
| SEC24C    |  | THNSL1     |
| SEC31A    |  | PLXNA4     |
| SEC31B    |  | GCNT3      |
| SEC61A1   |  | C6orf223   |
| SEC61A2   |  | NID1       |
| SEC62     |  | ANAPC5     |
| SEC63     |  | TNNC1      |
| SECISBP2L |  | RTL10      |
| SECTM1    |  | KRT10      |
| SEL1L     |  | SDHA       |
| SELENBP1  |  | LTBR       |
| SELENOH   |  | WDR35      |
| SELENOM   |  | IMMP2L     |
| SELENON   |  | SIRT5      |
| SELENOO   |  | MEAF6      |
| SELENOS   |  | TTC9       |
| SELENOW   |  | WWC3       |
| SELL      |  | AC004870.2 |
| SELPLG    |  | SNRPGP2    |
| SEM1      |  | ZNF710-AS1 |
| SEMA3A    |  | GPR35      |
| SEMA3B    |  | TANGO6     |
| SEMA3C    |  | VASH1      |
| SEMA3F    |  | C7orf50    |
| SEMA4A    |  | CREB1      |
| SEMA4B    |  | RN7SKP175  |
| SEMA4C    |  | KPNA4      |
| SEMA6B    |  | ZNF488     |
| SEMA6D    |  | PAIP1P1    |
| SENP3     |  | HCG25      |
| SENP5     |  | VEGFD      |
| SENP6     |  | NDUFA12    |
| SEPHS1    |  | ATXN7L2    |
| SEPHS2    |  | RPS19BP1   |

Table S6

|            |  |  |              |
|------------|--|--|--------------|
| SEPTIN11   |  |  | SLC22A18AS   |
| SEPTIN4    |  |  | CNOT10       |
| SEPTIN6    |  |  | INHBE        |
| SEPTIN7P2  |  |  | VXN          |
| SEPTIN8    |  |  | CBX2         |
| SEPTIN9    |  |  | SGO1         |
| SERAC1     |  |  | TIRAP        |
| SERBP1     |  |  | ZNF595       |
| SERF2      |  |  | HMGN4        |
| SERGEF     |  |  | CCDC50       |
| SERINC1    |  |  | AC073046.1   |
| SERINC5    |  |  | ZNF195       |
| SERP1      |  |  | GLIPR1       |
| SERPINA1   |  |  | GPX2         |
| SERPINA6   |  |  | BRPF3        |
| SERPINB1   |  |  | AP001528.1   |
| SERPINB2   |  |  | KRT8P12      |
| SERPINB6   |  |  | SMIM25       |
| SERPINB8   |  |  | PFKL         |
| SERPINB9   |  |  | CD14         |
| SERPINB9P1 |  |  | ZBTB46       |
| SERPINE2   |  |  | FIG4         |
| SERPING1   |  |  | TUT1         |
| SERTAD1    |  |  | ZNF491       |
| SERTAD2    |  |  | RSPH3        |
| SERTAD3    |  |  | TRPS1        |
| SESN1      |  |  | FOXN2        |
| SESN2      |  |  | RNU7-196P    |
| SETD1A     |  |  | AC009242.1   |
| SETD3      |  |  | VDAC2        |
| SETD5      |  |  | PTPN13       |
| SETD6      |  |  | CELF1        |
| SETD7      |  |  | GPR83        |
| SETDB1     |  |  | PACS2        |
| SEZ6L2     |  |  | GALT         |
| SF1        |  |  | NTPCR        |
| SF3A2      |  |  | AC145207.5   |
| SF3A3      |  |  | CCDC9B       |
| SF3B1      |  |  | B4GALNT2     |
| SF3B2      |  |  | AMN1         |
| SF3B4      |  |  | PRKACA       |
| SF3B5      |  |  | GSS          |
| SF3B6      |  |  | SMARCB1      |
| SFI1       |  |  | SERPINA10    |
| SFMBT1     |  |  | PSMC1P2      |
| SFN        |  |  | CSNK1G2P1    |
| SFPQ       |  |  | AC090673.1   |
| SFR1       |  |  | AC097636.2   |
| SFRP4      |  |  | NDEL1        |
| SFSWAP     |  |  | PGPEP1       |
| SFT2D1     |  |  | SREK1IP1     |
| SFTPA1     |  |  | ADGRG6       |
| SFTPA2     |  |  | KCTD9        |
| SFTPB      |  |  | CT83         |
| SFTPC      |  |  | TALDO1       |
| SFTPD      |  |  | FANCL        |
| SFXN3      |  |  | LARP4B       |
| SFXN4      |  |  | FGD2         |
| SFXN5      |  |  | SUPV3L1      |
| SGCA       |  |  | TRIM6-TRIM34 |

Table S6

|  |            |  |  |            |
|--|------------|--|--|------------|
|  | SGCE       |  |  | AC027309.2 |
|  | SGIP1      |  |  | RNF14      |
|  | SGK1       |  |  | GDAP1      |
|  | SGMS1      |  |  | MAOA       |
|  | SGPL1      |  |  | GLB1L2     |
|  | SGPP2      |  |  | REEP5      |
|  | SGSH       |  |  | ZBED4      |
|  | SGSM2      |  |  | SH3GLB1    |
|  | SGSM3      |  |  | BICD2      |
|  | SGTA       |  |  | AP002387.2 |
|  | SH2B1      |  |  | TNPO3      |
|  | SH2B3      |  |  | AC007849.1 |
|  | SH3BGRL2   |  |  | MPV17L     |
|  | SH3BGRL3   |  |  | PREPL      |
|  | SH3BP2     |  |  | SCAF11     |
|  | SH3BP5     |  |  | FJX1       |
|  | SH3BP5-AS1 |  |  | ZSCAN25    |
|  | SH3D19     |  |  | KPNA5      |
|  | SH3GL1     |  |  | UBA3       |
|  | SH3PXD2A   |  |  | LINC02331  |
|  | SH3PXD2B   |  |  | RPL39      |
|  | SH3RF1     |  |  | PRKCE      |
|  | SH3RF3     |  |  | HHEX       |
|  | SH3TC1     |  |  | MRPL34     |
|  | SH3TC2     |  |  | TXN        |
|  | SH3YL1     |  |  | SYT1       |
|  | SHANK3     |  |  | TCTN3      |
|  | SHB        |  |  | DGKG       |
|  | SHC1       |  |  | RBM4       |
|  | SHC2       |  |  | DNALI1     |
|  | SHE        |  |  | PUM1       |
|  | SHFL       |  |  | TMEM263    |
|  | SHISA5     |  |  | ZNF43      |
|  | SHISA9     |  |  | SLC1A4     |
|  | SHKBP1     |  |  | ITGA9-AS1  |
|  | SHOC2      |  |  | PSMA1      |
|  | SHQ1       |  |  | ITFG1      |
|  | SIAH2      |  |  | ZNF205     |
|  | SIDT2      |  |  | SMIM14     |
|  | SIGLEC16   |  |  | CWC15      |
|  | SIK1       |  |  | PRPF3      |
|  | SIK1B      |  |  | KIFC3      |
|  | SIK2       |  |  | HERC3      |
|  | SIL1       |  |  | NEDD4L     |
|  | SIMC1      |  |  | MMS19      |
|  | SIN3A      |  |  | AC022167.2 |
|  | SIN3B      |  |  | SPRED2     |
|  | SIRPA      |  |  | NUCB2      |
|  | SIRPB1     |  |  | ZNF737     |
|  | SIRT1      |  |  | AL139174.1 |
|  | SIRT5      |  |  | LEPROTL1   |
|  | SIRT7      |  |  | FIZ1       |
|  | SIVA1      |  |  | LRRC37B    |
|  | SIX1       |  |  | RN7SL674P  |
|  | SKA2       |  |  | FAM53B     |
|  | SKIV2L     |  |  | TLE3       |
|  | SKP1       |  |  | SETMAR     |
|  | SLAIN2     |  |  | IRF8       |
|  | SLAMF7     |  |  | AC093155.3 |
|  | SLBP       |  |  | DEPDC7     |



Table S6

|  |          |  |  |            |
|--|----------|--|--|------------|
|  | SLC10A3  |  |  | PCMT1      |
|  | SLC12A2  |  |  | SLU7       |
|  | SLC12A4  |  |  | AC092279.2 |
|  | SLC12A5  |  |  | CEBPG      |
|  | SLC12A6  |  |  | RPS19P1    |
|  | SLC12A7  |  |  | RIT1       |
|  | SLC13A1  |  |  | TP53TG1    |
|  | SLC15A2  |  |  | UCK2       |
|  | SLC16A4  |  |  | RPRD2      |
|  | SLC16A5  |  |  | AKR7A2     |
|  | SLC16A7  |  |  | WDR55      |
|  | SLC18B1  |  |  | LINC00158  |
|  | SLC19A2  |  |  | AC078923.1 |
|  | SLC22A15 |  |  | TMED7      |
|  | SLC22A17 |  |  | AC087190.3 |
|  | SLC22A23 |  |  | TMEM109    |
|  | SLC24A4  |  |  | RHOBTB3    |
|  | SLC25A1  |  |  | TMEM120B   |
|  | SLC25A11 |  |  | CTSL       |
|  | SLC25A17 |  |  | HAT1       |
|  | SLC25A19 |  |  | NDUFV2-AS1 |
|  | SLC25A21 |  |  | SMAD6      |
|  | SLC25A23 |  |  | RAB9A      |
|  | SLC25A25 |  |  | NCKAP5     |
|  | SLC25A26 |  |  | SNF8       |
|  | SLC25A28 |  |  | IREB2      |
|  | SLC25A29 |  |  | TMEM218    |
|  | SLC25A3  |  |  | KAT2B      |
|  | SLC25A30 |  |  | FLAD1      |
|  | SLC25A33 |  |  | SLC38A10   |
|  | SLC25A36 |  |  | RPL11      |
|  | SLC25A4  |  |  | MSH2       |
|  | SLC25A44 |  |  | CLDN4      |
|  | SLC25A5  |  |  | AC104035.1 |
|  | SLC25A6  |  |  | PRKAA1     |
|  | SLC26A4  |  |  | IL23A      |
|  | SLC26A6  |  |  | C1GALT1C1  |
|  | SLC26A8  |  |  | AL117339.5 |
|  | SLC27A1  |  |  | DUSP14     |
|  | SLC27A3  |  |  | AP2A2      |
|  | SLC28A2  |  |  | WDR61      |
|  | SLC29A1  |  |  | AARS1      |
|  | SLC2A1   |  |  | RTN4       |
|  | SLC30A1  |  |  | ANKRD36    |
|  | SLC30A4  |  |  | ARHGAP12   |
|  | SLC31A1  |  |  | TXNL4B     |
|  | SLC34A2  |  |  | LINC00205  |
|  | SLC35A3  |  |  | ELOA       |
|  | SLC35A4  |  |  | RPS2P44    |
|  | SLC35B2  |  |  | CLDN2      |
|  | SLC35C2  |  |  | NRBP2      |
|  | SLC35E1  |  |  | FGFR1OP2   |
|  | SLC35F1  |  |  | FAM193A    |
|  | SLC35F2  |  |  | FCGRT      |
|  | SLC35F3  |  |  | RPSAP9     |
|  | SLC35G2  |  |  | DST        |
|  | SLC37A4  |  |  | DYNC1LI1   |
|  | SLC38A10 |  |  | PRIMPOL    |
|  | SLC38A2  |  |  | IFT81      |
|  | SLC38A5  |  |  | AC091959.3 |

Table S6

|             |  |  |            |
|-------------|--|--|------------|
| SLC39A1     |  |  | AC016747.1 |
| SLC39A13    |  |  | FIBP       |
| SLC39A3     |  |  | GNB5       |
| SLC39A6     |  |  | AC138969.1 |
| SLC39A7     |  |  | CHKA       |
| SLC39A8     |  |  | SSUH2      |
| SLC40A1     |  |  | NBAS       |
| SLC41A1     |  |  | SNORD101   |
| SLC41A2     |  |  | LIX1L      |
| SLC41A3     |  |  | CCRL2      |
| SLC43A1     |  |  | SLC43A3    |
| SLC44A1     |  |  | ZMYM3      |
| SLC44A2     |  |  | KDM1B      |
| SLC44A3-AS1 |  |  | NOC3L      |
| SLC44A4     |  |  | CBX1P3     |
| SLC48A1     |  |  | FDPSP4     |
| SLC4A1AP    |  |  | MIR3173    |
| SLC4A7      |  |  | H3C5P      |
| SLC51A      |  |  | PIGL       |
| SLC52A2     |  |  | DTWD2      |
| SLC5A3      |  |  | ULBP3      |
| SLC5A6      |  |  | PAN2       |
| SLC66A2     |  |  | EEA1       |
| SLC6A4      |  |  | ECT2       |
| SLC6A8      |  |  | AC099518.1 |
| SLC7A2      |  |  | FKBP15     |
| SLC7A5      |  |  | ANKS4B     |
| SLC7A7      |  |  | RNASET2    |
| SLC8A1      |  |  | AL358472.7 |
| SLC8B1      |  |  | SNRNP25    |
| SLC9A1      |  |  | SOCS6      |
| SLC9A2      |  |  | ATR        |
| SLC9A3R2    |  |  | MFSD6      |
| SLC9A4      |  |  | ELOVL6     |
| SLC9A8      |  |  | C17orf113  |
| SLC9B2      |  |  | ENTPD4     |
| SLCO2B1     |  |  | UBR1       |
| SLCO4A1     |  |  | OR7E91P    |
| SLF2        |  |  | FAT2       |
| SLFN11      |  |  | PLXND1     |
| SLFN13      |  |  | TGFB2      |
| SLFN5       |  |  | FUT11      |
| SLIRP       |  |  | PHLDB1     |
| SLIT2       |  |  | PXMP2      |
| SLIT3       |  |  | DZIP1      |
| SLK         |  |  | CCPG1      |
| SLPI        |  |  | ANKRD26P1  |
| SLTM        |  |  | PLAAT3     |
| SLU7        |  |  | RBM48      |
| SLX1A       |  |  | AC022784.1 |
| SLX1B       |  |  | AL590714.1 |
| SMAD3       |  |  | CSTB       |
| SMAD7       |  |  | ZNF101     |
| SMAP2       |  |  | FAM229B    |
| SMARCA1     |  |  | RDH10      |
| SMARCA4     |  |  | AL158196.1 |
| SMARCAL1    |  |  | PIEZO2     |
| SMARCB1     |  |  | AC009226.1 |
| SMARCD1     |  |  | GPN1       |
| SMARCD2     |  |  | SGCB       |

Table S6

|  |          |  |  |             |
|--|----------|--|--|-------------|
|  | SMARCD3  |  |  | TLCD4-RWDD3 |
|  | SMC1B    |  |  | NBN         |
|  | SMC2-AS1 |  |  | ONECUT2     |
|  | SMC3     |  |  | LINC01559   |
|  | SMCHD1   |  |  | ERCC2       |
|  | SMCO4    |  |  | IMMT        |
|  | SMDT1    |  |  | AP003499.3  |
|  | SMG1P1   |  |  | WDR26       |
|  | SMG1P2   |  |  | BIN3        |
|  | SMG1P3   |  |  | DNAH14      |
|  | SMG1P4   |  |  | EIF4BP6     |
|  | SMG5     |  |  | H2BC21      |
|  | SMG7     |  |  | PSMB1       |
|  | SMG7-AS1 |  |  | MYRIP       |
|  | SMG9     |  |  | AC004494.1  |
|  | SMIM11A  |  |  | TGFBR3      |
|  | SMIM11B  |  |  | MLPH        |
|  | SMIM15   |  |  | TDP1        |
|  | SMIM25   |  |  | CYP3A4      |
|  | SMIM26   |  |  | AJ003147.3  |
|  | SMIM27   |  |  | DYNC1I2P1   |
|  | SMIM3    |  |  | CPED1       |
|  | SMIM4    |  |  | TBC1D23     |
|  | SMNDC1   |  |  | L3MBTL2     |
|  | SMPD1    |  |  | RAB43       |
|  | SMPD2    |  |  | DPYSL4      |
|  | SMPD4    |  |  | AREL1       |
|  | SMTN     |  |  | PLEKHS1     |
|  | SMURF1   |  |  | CRISPLD2    |
|  | SMYD3    |  |  | MINDY2      |
|  | SMYD5    |  |  | GABARAPL1   |
|  | SNAI1    |  |  | LINS1       |
|  | SNAP47   |  |  | CLDN7       |
|  | SNAPC2   |  |  | SDR42E1     |
|  | SNCG     |  |  | COPS7A      |
|  | SNED1    |  |  | MLLT3       |
|  | SNF8     |  |  | SRGAP2      |
|  | SNHG1    |  |  | NUP133      |
|  | SNHG11   |  |  | SMIM22      |
|  | SNHG12   |  |  | RAC1        |
|  | SNHG14   |  |  | NDUFC1      |
|  | SNHG15   |  |  | SLC29A1     |
|  | SNHG17   |  |  | UNC80       |
|  | SNHG19   |  |  | WWP1P1      |
|  | SNHG25   |  |  | RPL39L      |
|  | SNHG28   |  |  | ATP5MD      |
|  | SNHG29   |  |  | ZNF326      |
|  | SNHG3    |  |  | MIR425      |
|  | SNHG32   |  |  | FAM234A     |
|  | SNHG5    |  |  | TRAF6       |
|  | SNHG7    |  |  | SMIM31      |
|  | SNHG8    |  |  | KTI12       |
|  | SNHG9    |  |  | AC016596.1  |
|  | SNN      |  |  | H3-3A       |
|  | SNORA11F |  |  | GOT1        |
|  | SNORA12  |  |  | AK7         |
|  | SNORA3B  |  |  | AHRR        |
|  | SNORA73B |  |  | CAP2        |
|  | SNORA79B |  |  | LONRF1      |
|  | SNRNP200 |  |  | RIDA        |

Table S6

|  |          |  |  |                |
|--|----------|--|--|----------------|
|  | SNRNP27  |  |  | SNTB2          |
|  | SNRNP35  |  |  | EAF1           |
|  | SNRNP70  |  |  | FAM83G         |
|  | SNRPA1   |  |  | MED7           |
|  | SNRPC    |  |  | ATAD3B         |
|  | SNRPD2   |  |  | NFS1           |
|  | SNRPGP15 |  |  | PTPA           |
|  | SNRPN    |  |  | MMS22L         |
|  | SNTA1    |  |  | MICU2          |
|  | SNU13    |  |  | KLHDC8B        |
|  | SNUPN    |  |  | PRPF4          |
|  | SNW1     |  |  | RNVU1-24       |
|  | SNX10    |  |  | NDRG1          |
|  | SNX11    |  |  | HOXA-AS3       |
|  | SNX14    |  |  | PRUNE1         |
|  | SNX16    |  |  | HSPA9          |
|  | SNX17    |  |  | AC009090.5     |
|  | SNX19    |  |  | HSPB1          |
|  | SNX2     |  |  | GINS1          |
|  | SNX21    |  |  | NGFR           |
|  | SNX25    |  |  | ADGRL3         |
|  | SNX27    |  |  | COL20A1        |
|  | SNX3     |  |  | AC099489.3     |
|  | SNX33    |  |  | KEAP1          |
|  | SNX5     |  |  | PRELID2        |
|  | SNX6     |  |  | ISCU           |
|  | SNX8     |  |  | CARD10         |
|  | SOAT1    |  |  | SLC7A2         |
|  | SOCS1    |  |  | IPCEF1         |
|  | SOCS2    |  |  | CHGA           |
|  | SOCS4    |  |  | ACTA2-AS1      |
|  | SOCS5    |  |  | TUBA8          |
|  | SOCS7    |  |  | UMLILO         |
|  | SOD2     |  |  | MTND5P14       |
|  | SOD3     |  |  | AL355312.4     |
|  | SOGA1    |  |  | HOXB8          |
|  | SON      |  |  | CFLAR-AS1      |
|  | SORBS3   |  |  | RPL29          |
|  | SORL1    |  |  | SWI5           |
|  | SOS1     |  |  | SERPINA5       |
|  | SOS1-IT1 |  |  | MFSD14C        |
|  | SOWAHC   |  |  | MYL9           |
|  | SOX13    |  |  | SMDT1          |
|  | SOX21    |  |  | FAR2           |
|  | SOX4     |  |  | AC022400.5     |
|  | SOX9     |  |  | PINK1-AS       |
|  | SP100    |  |  | RAB30-DT       |
|  | SP110    |  |  | PSMB5          |
|  | SP140    |  |  | WBP1           |
|  | SP140L   |  |  | RTKN           |
|  | SP2      |  |  | MUS81          |
|  | SP6      |  |  | SPRY1          |
|  | SPAG1    |  |  | RBBP8NL        |
|  | SPAG7    |  |  | PSME2P2        |
|  | SPATA13  |  |  | RPL5P34        |
|  | SPATA18  |  |  | BLOC1S5-TXNDC5 |
|  | SPATS2L  |  |  | CCDC90B        |
|  | SPC24    |  |  | SELENOS        |
|  | SPC25    |  |  | GLUL           |
|  | SPCS1    |  |  | GNPTG          |

Table S6

|  |         |  |  |             |
|--|---------|--|--|-------------|
|  | SPCS2P4 |  |  | BECN1       |
|  | SPDEF   |  |  | BBS10       |
|  | SPECC1  |  |  | SRGAP2C     |
|  | SPECC1L |  |  | THAP3       |
|  | SPEN    |  |  | BORA        |
|  | SPG21   |  |  | CARD8-AS1   |
|  | SPG7    |  |  | SULT1C2     |
|  | SPHK1   |  |  | TMEM147     |
|  | SPI1    |  |  | ZFH3        |
|  | SPIDR   |  |  | AP000350.4  |
|  | SPIN1   |  |  | STAG1       |
|  | SPINDOC |  |  | SEMA4C      |
|  | SPINT2  |  |  | ARMCX5      |
|  | SPOP    |  |  | TMEM14C     |
|  | SPOPL   |  |  | IWS1        |
|  | SPOUT1  |  |  | H2BC3       |
|  | SPPL2A  |  |  | IRF2BPL     |
|  | SPRED1  |  |  | TFE3        |
|  | SPRED2  |  |  | ZNF586      |
|  | SPRR1A  |  |  | RPS16       |
|  | SPRR2B  |  |  | NIP7        |
|  | SPRR2D  |  |  | CSNK1G2     |
|  | SPRY1   |  |  | SLC25A37    |
|  | SPRY2   |  |  | PFDN6       |
|  | SPRY4   |  |  | HEATR5A     |
|  | SPRYD3  |  |  | TMEM147-AS1 |
|  | SPRYD4  |  |  | CRAMP1      |
|  | SPRYD7  |  |  | HS6ST2      |
|  | SPSB1   |  |  | RAB30       |
|  | SPTBN1  |  |  | TNS4        |
|  | SPTLC2  |  |  | TTL11-IT1   |
|  | SQOR    |  |  | ZNF773      |
|  | SQSTM1  |  |  | DNAH8       |
|  | SRA1    |  |  | KANK1       |
|  | SRBD1   |  |  | RPS3AP26    |
|  | SRCAP   |  |  | TNFRSF25    |
|  | SRD5A3  |  |  | NMT1        |
|  | SREBF2  |  |  | ANKZF1      |
|  | SREK1   |  |  | FAM117B     |
|  | SRFBP1  |  |  | NDUFB10     |
|  | SRGAP1  |  |  | SENP1       |
|  | SRGAP2B |  |  | EDC4        |
|  | SRGAP2C |  |  | PTPRO       |
|  | SRGN    |  |  | SLC35A1     |
|  | SRL     |  |  | IFNA2       |
|  | SRP68   |  |  | AL354702.1  |
|  | SRR     |  |  | AC011586.1  |
|  | SRRD    |  |  | AC093283.1  |
|  | SRRM2   |  |  | AC010271.2  |
|  | SRRM3   |  |  | ADCY3       |
|  | SRRT    |  |  | GPATCH11    |
|  | SRSF5   |  |  | RSRC1       |
|  | SRSF6   |  |  | PAXIP1      |
|  | SRSF7   |  |  | COX6C       |
|  | SRSF8   |  |  | ZDHHC9      |
|  | SRSF9   |  |  | BUD23       |
|  | SS18L1  |  |  | IKBKG       |
|  | SSB     |  |  | KCNJ2       |
|  | SSBP2   |  |  | AGTRAP      |
|  | SSBP4   |  |  | RFPL4AP6    |

Table S6

|  |            |  |  |            |
|--|------------|--|--|------------|
|  | SSH1       |  |  | DRAM2      |
|  | SSNA1      |  |  | HPS6       |
|  | SSR1       |  |  | SLC35A4    |
|  | SSR2       |  |  | AL596244.1 |
|  | SSR4       |  |  | WNK2       |
|  | SSRP1      |  |  | SYT11      |
|  | SSTR2      |  |  | EIF4G3     |
|  | ST20       |  |  | BICRAL     |
|  | ST3GAL1    |  |  | CCDC198    |
|  | ST3GAL3    |  |  | AC013717.1 |
|  | ST6GAL1    |  |  | SNX18P7    |
|  | ST6GAL2    |  |  | DPH6-DT    |
|  | ST6GALNAC2 |  |  | STRIP2     |
|  | ST6GALNAC4 |  |  | ATP5IF1    |
|  | ST6GALNAC6 |  |  | CCNK       |
|  | ST7L       |  |  | SNX19      |
|  | STAB1      |  |  | ENKD1      |
|  | STAG1      |  |  | NARS2      |
|  | STAM       |  |  | TAF10      |
|  | STAM2      |  |  | Z68871.1   |
|  | STAP1      |  |  | C17orf80   |
|  | STAP2      |  |  | RPS14      |
|  | STARD10    |  |  | PIGO       |
|  | STARD13    |  |  | Z97832.2   |
|  | STARD3     |  |  | LINC01138  |
|  | STARD3NL   |  |  | CRYBB2P1   |
|  | STARD7     |  |  | AC026403.1 |
|  | STARD8     |  |  | FAM122B    |
|  | STARD9     |  |  | LRRC75A    |
|  | STAT1      |  |  | OSER1-DT   |
|  | STAT2      |  |  | TLR2       |
|  | STAT3      |  |  | RUNX2      |
|  | STAT4      |  |  | COL17A1    |
|  | STAT5A     |  |  | ZNF107     |
|  | STAT5B     |  |  | SNORA38    |
|  | STAT6      |  |  | ZC3H10     |
|  | STAU1      |  |  | PIGX       |
|  | STAU2      |  |  | AL137856.1 |
|  | STC1       |  |  | AC133644.2 |
|  | STEAP1     |  |  | TAF9       |
|  | STEAP4     |  |  | MTHFS      |
|  | STIM1      |  |  | SGMS1      |
|  | STIMATE    |  |  | ATF6B      |
|  | STING1     |  |  | KIAA1211L  |
|  | STIP1      |  |  | METTL9     |
|  | STK10      |  |  | AC008982.1 |
|  | STK11IP    |  |  | RPS6KA2    |
|  | STK16      |  |  | CCDC9      |
|  | STK17B     |  |  | AC097634.4 |
|  | STK19      |  |  | EPB41L4A   |
|  | STK25      |  |  | AP4M1      |
|  | STK36      |  |  | VKORC1L1   |
|  | STK38      |  |  | AC006116.9 |
|  | STK38L     |  |  | SDHB       |
|  | STK4       |  |  | RCBTB2     |
|  | STK40      |  |  | H2AC6      |
|  | STMN1      |  |  | NUS1       |
|  | STMP1      |  |  | PGGHG      |
|  | STN1       |  |  | RAI14      |
|  | STOM       |  |  | RNU5A-1    |

Table S6

|  |                 |  |  |         |
|--|-----------------|--|--|---------|
|  | STOML2          |  |  | KREMEN1 |
|  | STON1           |  |  |         |
|  | STRAP           |  |  |         |
|  | STRIP1          |  |  |         |
|  | STRN4           |  |  |         |
|  | STT3B           |  |  |         |
|  | STUB1           |  |  |         |
|  | STX11           |  |  |         |
|  | STX12           |  |  |         |
|  | STX17           |  |  |         |
|  | STX18           |  |  |         |
|  | STX4            |  |  |         |
|  | STX5            |  |  |         |
|  | STXBP2          |  |  |         |
|  | STXBP6          |  |  |         |
|  | STYX            |  |  |         |
|  | SUCNR1          |  |  |         |
|  | SUGP1           |  |  |         |
|  | SUGP2           |  |  |         |
|  | SUGT1P4-STRA6LP |  |  |         |
|  | SULF2           |  |  |         |
|  | SULT1A1         |  |  |         |
|  | SULT1A3         |  |  |         |
|  | SULT1B1         |  |  |         |
|  | SUMF1           |  |  |         |
|  | SUMF2           |  |  |         |
|  | SUMO2           |  |  |         |
|  | SUMO2P17        |  |  |         |
|  | SUN1            |  |  |         |
|  | SUN2            |  |  |         |
|  | SUOX            |  |  |         |
|  | SUPT16H         |  |  |         |
|  | SUPT20H         |  |  |         |
|  | SUPT3H          |  |  |         |
|  | SUPT4H1         |  |  |         |
|  | SUPT5H          |  |  |         |
|  | SUPT6H          |  |  |         |
|  | SURF1           |  |  |         |
|  | SURF4           |  |  |         |
|  | SURF6           |  |  |         |
|  | SUSD1           |  |  |         |
|  | SUSD3           |  |  |         |
|  | SUSD6           |  |  |         |
|  | SUZ12P1         |  |  |         |
|  | SVBP            |  |  |         |
|  | SWAP70          |  |  |         |
|  | SYAP1           |  |  |         |
|  | SYBU            |  |  |         |
|  | SYF2            |  |  |         |
|  | SYN1            |  |  |         |
|  | SYNE1           |  |  |         |
|  | SYNE3           |  |  |         |
|  | SYNGAP1         |  |  |         |
|  | SYNGR1          |  |  |         |
|  | SYNGR2          |  |  |         |
|  | SYNM            |  |  |         |
|  | SYNPO           |  |  |         |
|  | SYNPO2          |  |  |         |
|  | SYPL1           |  |  |         |
|  | SYT11           |  |  |         |

Table S6

|  |           |  |  |  |
|--|-----------|--|--|--|
|  | SYT13     |  |  |  |
|  | SYVN1     |  |  |  |
|  | SZRD1     |  |  |  |
|  | TACC1     |  |  |  |
|  | TACC2     |  |  |  |
|  | TAF1      |  |  |  |
|  | TAF10     |  |  |  |
|  | TAF11     |  |  |  |
|  | TAF13     |  |  |  |
|  | TAF1C     |  |  |  |
|  | TAF4      |  |  |  |
|  | TAF5L     |  |  |  |
|  | TAF7      |  |  |  |
|  | TAFA2     |  |  |  |
|  | TAGAP     |  |  |  |
|  | TAGLN     |  |  |  |
|  | TAGLN2    |  |  |  |
|  | TALDO1    |  |  |  |
|  | TANC1     |  |  |  |
|  | TANC2     |  |  |  |
|  | TANGO6    |  |  |  |
|  | TAOK1     |  |  |  |
|  | TAOK3     |  |  |  |
|  | TAP1      |  |  |  |
|  | TAP2      |  |  |  |
|  | TAPT1-AS1 |  |  |  |
|  | TARBP2    |  |  |  |
|  | TARDBP    |  |  |  |
|  | TARS1     |  |  |  |
|  | TARS2     |  |  |  |
|  | TARS3     |  |  |  |
|  | TAS2R14   |  |  |  |
|  | TASOR     |  |  |  |
|  | TASOR2    |  |  |  |
|  | TASP1     |  |  |  |
|  | TATDN2    |  |  |  |
|  | TAX1BP1   |  |  |  |
|  | TAZ       |  |  |  |
|  | TBC1D10B  |  |  |  |
|  | TBC1D15   |  |  |  |
|  | TBC1D16   |  |  |  |
|  | TBC1D17   |  |  |  |
|  | TBC1D2    |  |  |  |
|  | TBC1D20   |  |  |  |
|  | TBC1D22A  |  |  |  |
|  | TBC1D25   |  |  |  |
|  | TBC1D2B   |  |  |  |
|  | TBC1D9    |  |  |  |
|  | TBC1D9B   |  |  |  |
|  | TBCD      |  |  |  |
|  | TBCEL     |  |  |  |
|  | TBKBP1    |  |  |  |
|  | TBL3      |  |  |  |
|  | TBP       |  |  |  |
|  | TBPL1     |  |  |  |
|  | TBRG1     |  |  |  |
|  | TBRG4     |  |  |  |
|  | TBX2      |  |  |  |
|  | TBX3      |  |  |  |
|  | TCAF1     |  |  |  |



Table S6

|           |  |  |  |
|-----------|--|--|--|
| TCEA3     |  |  |  |
| TCEAL4    |  |  |  |
| TCEAL8    |  |  |  |
| TCEAL9    |  |  |  |
| TCEANC2   |  |  |  |
| TCERG1    |  |  |  |
| TCF12     |  |  |  |
| TCF21     |  |  |  |
| TCF25     |  |  |  |
| TCF3      |  |  |  |
| TCF7L1    |  |  |  |
| TCF7L2    |  |  |  |
| TCFL5     |  |  |  |
| TCN1      |  |  |  |
| TCN2      |  |  |  |
| TCP1      |  |  |  |
| TCTN1     |  |  |  |
| TCTN3     |  |  |  |
| TDP2      |  |  |  |
| TDRD1     |  |  |  |
| TDRD7     |  |  |  |
| TDRKH-AS1 |  |  |  |
| TDRP      |  |  |  |
| TEAD2     |  |  |  |
| TEAD3     |  |  |  |
| TEAD4     |  |  |  |
| TECPR1    |  |  |  |
| TECRP1    |  |  |  |
| TECTA     |  |  |  |
| TEDC2     |  |  |  |
| TEF       |  |  |  |
| TELO2     |  |  |  |
| TENT4A    |  |  |  |
| TENT4B    |  |  |  |
| TENT5B    |  |  |  |
| TENT5C    |  |  |  |
| TERF2     |  |  |  |
| TERF2IP   |  |  |  |
| TESK1     |  |  |  |
| TET2      |  |  |  |
| TEX10     |  |  |  |
| TEX2      |  |  |  |
| TEX264    |  |  |  |
| TEX41     |  |  |  |
| TEX9      |  |  |  |
| TFAP2A    |  |  |  |
| TFB2M     |  |  |  |
| TFE3      |  |  |  |
| TFEB      |  |  |  |
| TFEC      |  |  |  |
| TFIP11    |  |  |  |
| TFPI2     |  |  |  |
| TG        |  |  |  |
| TGFA      |  |  |  |
| TGFB1     |  |  |  |
| TGFB111   |  |  |  |
| TGFB2     |  |  |  |
| TGFBR1    |  |  |  |
| TGFBR2    |  |  |  |
| TGFBRAP1  |  |  |  |

Table S6

|           |  |  |  |
|-----------|--|--|--|
| TGIF2     |  |  |  |
| TGM2      |  |  |  |
| THAP1     |  |  |  |
| THAP12    |  |  |  |
| THAP2     |  |  |  |
| THAP3     |  |  |  |
| THAP4     |  |  |  |
| THAP5     |  |  |  |
| THAP7     |  |  |  |
| THAP9-AS1 |  |  |  |
| THBD      |  |  |  |
| THBS3     |  |  |  |
| THEM4     |  |  |  |
| THEMIS2   |  |  |  |
| THG1L     |  |  |  |
| THOC1     |  |  |  |
| THOC3     |  |  |  |
| THOC6     |  |  |  |
| THOC7     |  |  |  |
| THOP1     |  |  |  |
| THRA      |  |  |  |
| THRB      |  |  |  |
| THSD4     |  |  |  |
| THUMPD1   |  |  |  |
| THUMPD3   |  |  |  |
| TIA1      |  |  |  |
| TIAM1     |  |  |  |
| TICAM1    |  |  |  |
| TIFA      |  |  |  |
| TIGAR     |  |  |  |
| TIMELESS  |  |  |  |
| TIMM10    |  |  |  |
| TIMM10B   |  |  |  |
| TIMM13    |  |  |  |
| TIMM17B   |  |  |  |
| TIMM23    |  |  |  |
| TIMM44    |  |  |  |
| TIMM9     |  |  |  |
| TIMP1     |  |  |  |
| TIMP3     |  |  |  |
| TINAGL1   |  |  |  |
| TINCR     |  |  |  |
| TIPRL     |  |  |  |
| TJAP1     |  |  |  |
| TJP1      |  |  |  |
| TJP2      |  |  |  |
| TJP3      |  |  |  |
| TKFC      |  |  |  |
| TKT       |  |  |  |
| TLCD3A    |  |  |  |
| TLCD4     |  |  |  |
| TLCD5     |  |  |  |
| TLDC2     |  |  |  |
| TLE1      |  |  |  |
| TLE2      |  |  |  |
| TLE3      |  |  |  |
| TLE4      |  |  |  |
| TLL1      |  |  |  |
| TLN1      |  |  |  |
| TLR1      |  |  |  |

Table S6

|  |          |  |  |  |
|--|----------|--|--|--|
|  | TLR2     |  |  |  |
|  | TLR4     |  |  |  |
|  | TLR6     |  |  |  |
|  | TLR7     |  |  |  |
|  | TM4SF1   |  |  |  |
|  | TM4SF19  |  |  |  |
|  | TM4SF20  |  |  |  |
|  | TM7SF3   |  |  |  |
|  | TM9SF3   |  |  |  |
|  | TMA7     |  |  |  |
|  | TMBIM1   |  |  |  |
|  | TMC6     |  |  |  |
|  | TMCO1    |  |  |  |
|  | TMCO3    |  |  |  |
|  | TMCO4    |  |  |  |
|  | TMED10   |  |  |  |
|  | TMED4    |  |  |  |
|  | TMED5    |  |  |  |
|  | TMED8    |  |  |  |
|  | TMED9    |  |  |  |
|  | TMEM100  |  |  |  |
|  | TMEM109  |  |  |  |
|  | TMEM11   |  |  |  |
|  | TMEM115  |  |  |  |
|  | TMEM123  |  |  |  |
|  | TMEM125  |  |  |  |
|  | TMEM126B |  |  |  |
|  | TMEM127  |  |  |  |
|  | TMEM131  |  |  |  |
|  | TMEM133  |  |  |  |
|  | TMEM134  |  |  |  |
|  | TMEM141  |  |  |  |
|  | TMEM14B  |  |  |  |
|  | TMEM150A |  |  |  |
|  | TMEM154  |  |  |  |
|  | TMEM159  |  |  |  |
|  | TMEM160  |  |  |  |
|  | TMEM161A |  |  |  |
|  | TMEM171  |  |  |  |
|  | TMEM175  |  |  |  |
|  | TMEM176B |  |  |  |
|  | TMEM18   |  |  |  |
|  | TMEM183A |  |  |  |
|  | TMEM184B |  |  |  |
|  | TMEM185A |  |  |  |
|  | TMEM189  |  |  |  |
|  | TMEM192  |  |  |  |
|  | TMEM198B |  |  |  |
|  | TMEM201  |  |  |  |
|  | TMEM203  |  |  |  |
|  | TMEM205  |  |  |  |
|  | TMEM208  |  |  |  |
|  | TMEM209  |  |  |  |
|  | TMEM212  |  |  |  |
|  | TMEM214  |  |  |  |
|  | TMEM218  |  |  |  |
|  | TMEM219  |  |  |  |
|  | TMEM222  |  |  |  |
|  | TMEM230  |  |  |  |
|  | TMEM243  |  |  |  |

Table S6

|  |             |  |  |  |
|--|-------------|--|--|--|
|  | TMEM245     |  |  |  |
|  | TMEM254     |  |  |  |
|  | TMEM254-AS1 |  |  |  |
|  | TMEM255B    |  |  |  |
|  | TMEM258     |  |  |  |
|  | TMEM259     |  |  |  |
|  | TMEM260     |  |  |  |
|  | TMEM39A     |  |  |  |
|  | TMEM39B     |  |  |  |
|  | TMEM41B     |  |  |  |
|  | TMEM43      |  |  |  |
|  | TMEM45A     |  |  |  |
|  | TMEM45B     |  |  |  |
|  | TMEM50A     |  |  |  |
|  | TMEM50B     |  |  |  |
|  | TMEM51      |  |  |  |
|  | TMEM52B     |  |  |  |
|  | TMEM54      |  |  |  |
|  | TMEM59      |  |  |  |
|  | TMEM60      |  |  |  |
|  | TMEM69      |  |  |  |
|  | TMEM71      |  |  |  |
|  | TMEM74B     |  |  |  |
|  | TMEM87B     |  |  |  |
|  | TMEM88      |  |  |  |
|  | TMEM92      |  |  |  |
|  | TMEM94      |  |  |  |
|  | TMEM97      |  |  |  |
|  | TMEM9B      |  |  |  |
|  | TMLHE-AS1   |  |  |  |
|  | TMOD1       |  |  |  |
|  | TMOD2       |  |  |  |
|  | TMOD3       |  |  |  |
|  | TMPRSS2     |  |  |  |
|  | TMSB10      |  |  |  |
|  | TMSB4XP4    |  |  |  |
|  | TMTC1       |  |  |  |
|  | TMUB2       |  |  |  |
|  | TMX1        |  |  |  |
|  | TMX2        |  |  |  |
|  | TNF         |  |  |  |
|  | TNFAIP1     |  |  |  |
|  | TNFAIP6     |  |  |  |
|  | TNFAIP8     |  |  |  |
|  | TNFAIP8L3   |  |  |  |
|  | TNFRSF10B   |  |  |  |
|  | TNFRSF10D   |  |  |  |
|  | TNFRSF14    |  |  |  |
|  | TNFRSF1B    |  |  |  |
|  | TNFRSF21    |  |  |  |
|  | TNFSF10     |  |  |  |
|  | TNFSF13B    |  |  |  |
|  | TNFSF14     |  |  |  |
|  | TNFSF8      |  |  |  |
|  | TNIK        |  |  |  |
|  | TNIP1       |  |  |  |
|  | TNIP2       |  |  |  |
|  | TNIP3       |  |  |  |
|  | TNNC1       |  |  |  |
|  | TNNT2       |  |  |  |

Table S6

|          |  |  |  |
|----------|--|--|--|
| TNPO2    |  |  |  |
| TNRC18P3 |  |  |  |
| TNRC6C   |  |  |  |
| TNS1     |  |  |  |
| TNS2     |  |  |  |
| TNS4     |  |  |  |
| TNXA     |  |  |  |
| TNXB     |  |  |  |
| TOB2     |  |  |  |
| TOE1     |  |  |  |
| TOLLIP   |  |  |  |
| TOM1     |  |  |  |
| TOM1L2   |  |  |  |
| TOMM34   |  |  |  |
| TOMM40   |  |  |  |
| TOMM40L  |  |  |  |
| TOP1MT   |  |  |  |
| TOP2A    |  |  |  |
| TOP2B    |  |  |  |
| TOP3A    |  |  |  |
| TOR1A    |  |  |  |
| TOR1AIP1 |  |  |  |
| TOR1AIP2 |  |  |  |
| TOR1B    |  |  |  |
| TOR4A    |  |  |  |
| TOX4     |  |  |  |
| TP53     |  |  |  |
| TP53BP1  |  |  |  |
| TP53BP2  |  |  |  |
| TP53I3   |  |  |  |
| TP53INP2 |  |  |  |
| TP53RK   |  |  |  |
| TP53TG3E |  |  |  |
| TP73     |  |  |  |
| TP73-AS1 |  |  |  |
| TPBG     |  |  |  |
| TPCN1    |  |  |  |
| TPD52L2  |  |  |  |
| TPH2     |  |  |  |
| TPM1     |  |  |  |
| TPM2     |  |  |  |
| TPM4     |  |  |  |
| TPMT     |  |  |  |
| TPP1     |  |  |  |
| TPPP     |  |  |  |
| TPR      |  |  |  |
| TPRA1    |  |  |  |
| TPRG1L   |  |  |  |
| TPRKB    |  |  |  |
| TPSAB1   |  |  |  |
| TPSB2    |  |  |  |
| TPST1    |  |  |  |
| TPT1     |  |  |  |
| TPT1-AS1 |  |  |  |
| TPTEP1   |  |  |  |
| TRA2B    |  |  |  |
| TRABD    |  |  |  |
| TRAF1    |  |  |  |
| TRAF2    |  |  |  |
| TRAF3IP2 |  |  |  |

Table S6

|  |              |  |  |  |
|--|--------------|--|--|--|
|  | TRAF3IP2-AS1 |  |  |  |
|  | TRAF4        |  |  |  |
|  | TRAF5        |  |  |  |
|  | TRAF6        |  |  |  |
|  | TRAK1        |  |  |  |
|  | TRAK2        |  |  |  |
|  | TRAM2        |  |  |  |
|  | TRAP1        |  |  |  |
|  | TRAPPC1      |  |  |  |
|  | TRAPPC10     |  |  |  |
|  | TRAPPC12     |  |  |  |
|  | TRAPPC2B     |  |  |  |
|  | TRAPPC3      |  |  |  |
|  | TRAPPC4      |  |  |  |
|  | TRAPPC9      |  |  |  |
|  | TREM1        |  |  |  |
|  | TREML3P      |  |  |  |
|  | TRGC2        |  |  |  |
|  | TRIB1        |  |  |  |
|  | TRIB3        |  |  |  |
|  | TRIM11       |  |  |  |
|  | TRIM14       |  |  |  |
|  | TRIM16       |  |  |  |
|  | TRIM16L      |  |  |  |
|  | TRIM21       |  |  |  |
|  | TRIM22       |  |  |  |
|  | TRIM25       |  |  |  |
|  | TRIM26       |  |  |  |
|  | TRIM27       |  |  |  |
|  | TRIM29       |  |  |  |
|  | TRIM3        |  |  |  |
|  | TRIM38       |  |  |  |
|  | TRIM5        |  |  |  |
|  | TRIM52-AS1   |  |  |  |
|  | TRIM59       |  |  |  |
|  | TRIM68       |  |  |  |
|  | TRIM69       |  |  |  |
|  | TRIO         |  |  |  |
|  | TRIP10       |  |  |  |
|  | TRIP6        |  |  |  |
|  | TRIQK        |  |  |  |
|  | TRIR         |  |  |  |
|  | TRIT1        |  |  |  |
|  | TRMT1        |  |  |  |
|  | TRMT10A      |  |  |  |
|  | TRMT11       |  |  |  |
|  | TRMT12       |  |  |  |
|  | TRMT1L       |  |  |  |
|  | TRMT5        |  |  |  |
|  | TRMT61A      |  |  |  |
|  | TRMU         |  |  |  |
|  | TRNAU1AP     |  |  |  |
|  | TROAP        |  |  |  |
|  | TRPA1        |  |  |  |
|  | TRPC4AP      |  |  |  |
|  | TRPC6        |  |  |  |
|  | TRPM2-AS     |  |  |  |
|  | TRPM4        |  |  |  |
|  | TRPM7        |  |  |  |
|  | TRPM8        |  |  |  |

Table S6

|  |           |  |  |  |
|--|-----------|--|--|--|
|  | TRPS1     |  |  |  |
|  | TRRAP     |  |  |  |
|  | TRUB2     |  |  |  |
|  | TSBP1-AS1 |  |  |  |
|  | TSC1      |  |  |  |
|  | TSC2      |  |  |  |
|  | TSC22D1   |  |  |  |
|  | TSC22D3   |  |  |  |
|  | TSC22D4   |  |  |  |
|  | TSEN34    |  |  |  |
|  | TSEN54    |  |  |  |
|  | TSFM      |  |  |  |
|  | TSHZ1     |  |  |  |
|  | TSHZ3     |  |  |  |
|  | TSIX      |  |  |  |
|  | TSN       |  |  |  |
|  | TSPAN14   |  |  |  |
|  | TSPAN17   |  |  |  |
|  | TSPAN18   |  |  |  |
|  | TSPAN31   |  |  |  |
|  | TSPAN4    |  |  |  |
|  | TSPAN7    |  |  |  |
|  | TSPAN9    |  |  |  |
|  | TSPO      |  |  |  |
|  | TSPY26P   |  |  |  |
|  | TSPYL1    |  |  |  |
|  | TSPYL2    |  |  |  |
|  | TSPYL4    |  |  |  |
|  | TSR1      |  |  |  |
|  | TSR3      |  |  |  |
|  | TSSC4     |  |  |  |
|  | TSSK6     |  |  |  |
|  | TSTA3     |  |  |  |
|  | TTBK2     |  |  |  |
|  | TTC14     |  |  |  |
|  | TTC19     |  |  |  |
|  | TTC3      |  |  |  |
|  | TTC31     |  |  |  |
|  | TTC38     |  |  |  |
|  | TTC39B    |  |  |  |
|  | TTC7A     |  |  |  |
|  | TTC7B     |  |  |  |
|  | TTC9C     |  |  |  |
|  | TTF1      |  |  |  |
|  | TTL       |  |  |  |
|  | TTLL4     |  |  |  |
|  | TTPA      |  |  |  |
|  | TTY15     |  |  |  |
|  | TUBA1A    |  |  |  |
|  | TUBA1B    |  |  |  |
|  | TUBA1C    |  |  |  |
|  | TUBA3D    |  |  |  |
|  | TUBA4A    |  |  |  |
|  | TUBAP2    |  |  |  |
|  | TUBB      |  |  |  |
|  | TUBB2A    |  |  |  |
|  | TUBB2B    |  |  |  |
|  | TUBB4B    |  |  |  |
|  | TUBB6     |  |  |  |
|  | TUBG1     |  |  |  |

Table S6

|           |  |  |  |
|-----------|--|--|--|
| TUBGCP2   |  |  |  |
| TUBGCP3   |  |  |  |
| TUBGCP4   |  |  |  |
| TUBGCP6   |  |  |  |
| TUFM      |  |  |  |
| TUG1      |  |  |  |
| TULP3     |  |  |  |
| TULP4     |  |  |  |
| TUSC2     |  |  |  |
| TUSC3     |  |  |  |
| TUT4      |  |  |  |
| TVP23B    |  |  |  |
| TWF1P1    |  |  |  |
| TWF2      |  |  |  |
| TWIST2    |  |  |  |
| TWNK      |  |  |  |
| TXLNA     |  |  |  |
| TXLNGY    |  |  |  |
| TXNDC11   |  |  |  |
| TXNDC12   |  |  |  |
| TXNDC15   |  |  |  |
| TXNL4A    |  |  |  |
| TXNL4B    |  |  |  |
| TYMS      |  |  |  |
| TYRO3     |  |  |  |
| TYW1B     |  |  |  |
| U2AF1     |  |  |  |
| U2AF1L5   |  |  |  |
| U2AF2     |  |  |  |
| U2SURP    |  |  |  |
| U62317.1  |  |  |  |
| UACA      |  |  |  |
| UAP1      |  |  |  |
| UAP1L1    |  |  |  |
| UBA1      |  |  |  |
| UBA2      |  |  |  |
| UBA52     |  |  |  |
| UBA7      |  |  |  |
| UBAC2     |  |  |  |
| UBAC2-AS1 |  |  |  |
| UBALD1    |  |  |  |
| UBAP2     |  |  |  |
| UBASH3B   |  |  |  |
| UBB       |  |  |  |
| UBC       |  |  |  |
| UBE2A     |  |  |  |
| UBE2B     |  |  |  |
| UBE2D1    |  |  |  |
| UBE2D2    |  |  |  |
| UBE2D3    |  |  |  |
| UBE2E1    |  |  |  |
| UBE2E2    |  |  |  |
| UBE2E3    |  |  |  |
| UBE2F     |  |  |  |
| UBE2G2    |  |  |  |
| UBE2H     |  |  |  |
| UBE2I     |  |  |  |
| UBE2J1    |  |  |  |
| UBE2J2    |  |  |  |
| UBE2L6    |  |  |  |



Table S6

|          |  |  |  |
|----------|--|--|--|
| UBE2M    |  |  |  |
| UBE2N    |  |  |  |
| UBE2O    |  |  |  |
| UBE2Q1   |  |  |  |
| UBE2Z    |  |  |  |
| UBE3A    |  |  |  |
| UBE3C    |  |  |  |
| UBIAD1   |  |  |  |
| UBL3     |  |  |  |
| UBL4A    |  |  |  |
| UBL5     |  |  |  |
| UBL7     |  |  |  |
| UBN1     |  |  |  |
| UBQLN1   |  |  |  |
| UBQLN4   |  |  |  |
| UBR4     |  |  |  |
| UBR5     |  |  |  |
| UBTF     |  |  |  |
| UBXN1    |  |  |  |
| UBXN11   |  |  |  |
| UBXN2B   |  |  |  |
| UBXN6    |  |  |  |
| UBXN7    |  |  |  |
| UCHL1    |  |  |  |
| UCHL5    |  |  |  |
| UCK1     |  |  |  |
| UCK2     |  |  |  |
| UCP2     |  |  |  |
| UEVLD    |  |  |  |
| UFD1     |  |  |  |
| UFSP2    |  |  |  |
| UGDH-AS1 |  |  |  |
| UGGT2    |  |  |  |
| UGT1A7   |  |  |  |
| UHRF1BP1 |  |  |  |
| UHRF2    |  |  |  |
| UIMC1    |  |  |  |
| ULBP2    |  |  |  |
| ULK1     |  |  |  |
| UMPS     |  |  |  |
| UNC13A   |  |  |  |
| UNC13B   |  |  |  |
| UNC13D   |  |  |  |
| UNC45A   |  |  |  |
| UNC5D    |  |  |  |
| UNC93B1  |  |  |  |
| UNK      |  |  |  |
| UPF1     |  |  |  |
| UPF3A    |  |  |  |
| UPF3B    |  |  |  |
| UPK2     |  |  |  |
| UPK3B    |  |  |  |
| UPP1     |  |  |  |
| UQCC1    |  |  |  |
| UQCC2    |  |  |  |
| UQCRC1   |  |  |  |
| UQCRC2   |  |  |  |
| UQCRFS1  |  |  |  |
| URB1     |  |  |  |
| URB2     |  |  |  |

Table S6

|  |        |  |  |  |
|--|--------|--|--|--|
|  | URGCP  |  |  |  |
|  | URM1   |  |  |  |
|  | UROD   |  |  |  |
|  | USB1   |  |  |  |
|  | USE1   |  |  |  |
|  | USF1   |  |  |  |
|  | USF3   |  |  |  |
|  | USH1C  |  |  |  |
|  | USHBP1 |  |  |  |
|  | USP10  |  |  |  |
|  | USP15  |  |  |  |
|  | USP18  |  |  |  |
|  | USP19  |  |  |  |
|  | USP20  |  |  |  |
|  | USP21  |  |  |  |
|  | USP22  |  |  |  |
|  | USP25  |  |  |  |
|  | USP3   |  |  |  |
|  | USP30  |  |  |  |
|  | USP39  |  |  |  |
|  | USP4   |  |  |  |
|  | USP40  |  |  |  |
|  | USP47  |  |  |  |
|  | USP48  |  |  |  |
|  | USP49  |  |  |  |
|  | USP5   |  |  |  |
|  | USP53  |  |  |  |
|  | USP7   |  |  |  |
|  | UTP14C |  |  |  |
|  | UTP20  |  |  |  |
|  | UTP23  |  |  |  |
|  | UTP3   |  |  |  |
|  | UTP4   |  |  |  |
|  | UTP6   |  |  |  |
|  | VAC14  |  |  |  |
|  | VAMP1  |  |  |  |
|  | VAMP3  |  |  |  |
|  | VAMP5  |  |  |  |
|  | VANGL1 |  |  |  |
|  | VANGL2 |  |  |  |
|  | VAPB   |  |  |  |
|  | VASH1  |  |  |  |
|  | VASN   |  |  |  |
|  | VASP   |  |  |  |
|  | VAT1   |  |  |  |
|  | VAV1   |  |  |  |
|  | VAV2   |  |  |  |
|  | VAV3   |  |  |  |
|  | VAX1   |  |  |  |
|  | VCAN   |  |  |  |
|  | VCP    |  |  |  |
|  | VCPIP1 |  |  |  |
|  | VCPKMT |  |  |  |
|  | VDAC1  |  |  |  |
|  | VDAC3  |  |  |  |
|  | VEGFA  |  |  |  |
|  | VEGFB  |  |  |  |
|  | VEGFD  |  |  |  |
|  | VEZT   |  |  |  |
|  | VGLL3  |  |  |  |

Table S6

|          |  |  |  |
|----------|--|--|--|
| VGLL4    |  |  |  |
| VIM      |  |  |  |
| VIPAS39  |  |  |  |
| VIPR1    |  |  |  |
| VIRMA    |  |  |  |
| VKORC1   |  |  |  |
| VLDLR    |  |  |  |
| VNN2     |  |  |  |
| VNN3     |  |  |  |
| VOPP1    |  |  |  |
| VPS11    |  |  |  |
| VPS13D   |  |  |  |
| VPS16    |  |  |  |
| VPS18    |  |  |  |
| VPS25    |  |  |  |
| VPS26A   |  |  |  |
| VPS26C   |  |  |  |
| VPS28    |  |  |  |
| VPS29    |  |  |  |
| VPS33B   |  |  |  |
| VPS35    |  |  |  |
| VPS37B   |  |  |  |
| VPS39    |  |  |  |
| VPS45    |  |  |  |
| VPS51    |  |  |  |
| VPS53    |  |  |  |
| VPS54    |  |  |  |
| VPS72    |  |  |  |
| VPS8     |  |  |  |
| VSIG1    |  |  |  |
| VSIG10   |  |  |  |
| VSIG10L  |  |  |  |
| VSIG2    |  |  |  |
| VSX1     |  |  |  |
| VTI1A    |  |  |  |
| VTRNA1-1 |  |  |  |
| VTRNA1-2 |  |  |  |
| VWA7     |  |  |  |
| VWF      |  |  |  |
| WAPL     |  |  |  |
| WARS2    |  |  |  |
| WAS      |  |  |  |
| WASF2    |  |  |  |
| WASF3    |  |  |  |
| WASH2P   |  |  |  |
| WASH3P   |  |  |  |
| WASH4P   |  |  |  |
| WASH5P   |  |  |  |
| WASH6P   |  |  |  |
| WASH7P   |  |  |  |
| WASH8P   |  |  |  |
| WASH9P   |  |  |  |
| WASHC1   |  |  |  |
| WASHC2A  |  |  |  |
| WASHC4   |  |  |  |
| WASL     |  |  |  |
| WBP1L    |  |  |  |
| WDFY2    |  |  |  |
| WDFY3    |  |  |  |
| WDR11    |  |  |  |

Table S6

|         |  |  |  |
|---------|--|--|--|
| WDR13   |  |  |  |
| WDR18   |  |  |  |
| WDR20   |  |  |  |
| WDR27   |  |  |  |
| WDR34   |  |  |  |
| WDR35   |  |  |  |
| WDR36   |  |  |  |
| WDR37   |  |  |  |
| WDR4    |  |  |  |
| WDR43   |  |  |  |
| WDR44   |  |  |  |
| WDR45B  |  |  |  |
| WDR46   |  |  |  |
| WDR5    |  |  |  |
| WDR59   |  |  |  |
| WDR6    |  |  |  |
| WDR60   |  |  |  |
| WDR61   |  |  |  |
| WDR74   |  |  |  |
| WDR75   |  |  |  |
| WDR78   |  |  |  |
| WDR82   |  |  |  |
| WDR83OS |  |  |  |
| WDR88   |  |  |  |
| WDR89   |  |  |  |
| WDR91   |  |  |  |
| WDTC1   |  |  |  |
| WDYHV1  |  |  |  |
| WEE1    |  |  |  |
| WFDC2   |  |  |  |
| WFDC21P |  |  |  |
| WFS1    |  |  |  |
| WHAMM   |  |  |  |
| WIPF1   |  |  |  |
| WIPI1   |  |  |  |
| WIPI2   |  |  |  |
| WNK4    |  |  |  |
| WNT2B   |  |  |  |
| WNT7B   |  |  |  |
| WNT9A   |  |  |  |
| WRAP73  |  |  |  |
| WRNIP1  |  |  |  |
| WTAP    |  |  |  |
| WTIP    |  |  |  |
| WWC2    |  |  |  |
| WWTR1   |  |  |  |
| XAB2    |  |  |  |
| XAF1    |  |  |  |
| XAGE1A  |  |  |  |
| XAGE1B  |  |  |  |
| XKR9    |  |  |  |
| XPA     |  |  |  |
| XPC     |  |  |  |
| XPNPEP1 |  |  |  |
| XPO5    |  |  |  |
| XRCC6   |  |  |  |
| XRN1    |  |  |  |
| XRN2    |  |  |  |
| XYLB    |  |  |  |
| XYLT1   |  |  |  |

Table S6

|  |          |  |  |  |
|--|----------|--|--|--|
|  | XYLT2    |  |  |  |
|  | YAE1     |  |  |  |
|  | YAP1     |  |  |  |
|  | YARS1    |  |  |  |
|  | YBX1     |  |  |  |
|  | YBX1P1   |  |  |  |
|  | YEATS2   |  |  |  |
|  | YIPF1    |  |  |  |
|  | YIPF5    |  |  |  |
|  | YIPF6    |  |  |  |
|  | YJU2     |  |  |  |
|  | YKT6     |  |  |  |
|  | YPEL2    |  |  |  |
|  | YPEL3    |  |  |  |
|  | YRDC     |  |  |  |
|  | YTHDF1   |  |  |  |
|  | YWHAE    |  |  |  |
|  | YWHAZ    |  |  |  |
|  | YY2      |  |  |  |
|  | ZBED2    |  |  |  |
|  | ZBED4    |  |  |  |
|  | ZBED5    |  |  |  |
|  | ZBED8    |  |  |  |
|  | ZBP1     |  |  |  |
|  | ZBTB1    |  |  |  |
|  | ZBTB10   |  |  |  |
|  | ZBTB14   |  |  |  |
|  | ZBTB17   |  |  |  |
|  | ZBTB18   |  |  |  |
|  | ZBTB2    |  |  |  |
|  | ZBTB24   |  |  |  |
|  | ZBTB33   |  |  |  |
|  | ZBTB34   |  |  |  |
|  | ZBTB38   |  |  |  |
|  | ZBTB39   |  |  |  |
|  | ZBTB4    |  |  |  |
|  | ZBTB40   |  |  |  |
|  | ZBTB44   |  |  |  |
|  | ZBTB46   |  |  |  |
|  | ZBTB5    |  |  |  |
|  | ZBTB7A   |  |  |  |
|  | ZBTB8OS  |  |  |  |
|  | ZBTB9    |  |  |  |
|  | ZC3H11A  |  |  |  |
|  | ZC3H12A  |  |  |  |
|  | ZC3H18   |  |  |  |
|  | ZC3H4    |  |  |  |
|  | ZC3H6    |  |  |  |
|  | ZC3H7A   |  |  |  |
|  | ZC3H7B   |  |  |  |
|  | ZC3HAV1  |  |  |  |
|  | ZC3HC1   |  |  |  |
|  | ZCCHC14  |  |  |  |
|  | ZCCHC24  |  |  |  |
|  | ZCCHC3   |  |  |  |
|  | ZCCHC7   |  |  |  |
|  | ZCCHC8   |  |  |  |
|  | ZCCHC9   |  |  |  |
|  | ZDHHC11  |  |  |  |
|  | ZDHHC11B |  |  |  |

Table S6

|          |  |  |  |
|----------|--|--|--|
| ZDHHC12  |  |  |  |
| ZDHHC13  |  |  |  |
| ZDHHC14  |  |  |  |
| ZDHHC16  |  |  |  |
| ZDHHC19  |  |  |  |
| ZDHHC2   |  |  |  |
| ZDHHC6   |  |  |  |
| ZDHHC7   |  |  |  |
| ZDHHC8P1 |  |  |  |
| ZEB1     |  |  |  |
| ZER1     |  |  |  |
| ZFAND2A  |  |  |  |
| ZFAND2B  |  |  |  |
| ZFAND5   |  |  |  |
| ZFAND6   |  |  |  |
| ZFAT     |  |  |  |
| ZFP28    |  |  |  |
| ZFP3     |  |  |  |
| ZFP36L1  |  |  |  |
| ZFP36L2  |  |  |  |
| ZFP64    |  |  |  |
| ZFP90    |  |  |  |
| ZFYVE1   |  |  |  |
| ZFYVE19  |  |  |  |
| ZFYVE27  |  |  |  |
| ZHX3     |  |  |  |
| ZKSCAN1  |  |  |  |
| ZKSCAN5  |  |  |  |
| ZMAT2    |  |  |  |
| ZMIZ1    |  |  |  |
| ZMIZ2    |  |  |  |
| ZMPSTE24 |  |  |  |
| ZMYM2    |  |  |  |
| ZMYM4    |  |  |  |
| ZMYND12  |  |  |  |
| ZMYND19  |  |  |  |
| ZNF10    |  |  |  |
| ZNF100   |  |  |  |
| ZNF106   |  |  |  |
| ZNF12    |  |  |  |
| ZNF121   |  |  |  |
| ZNF131   |  |  |  |
| ZNF133   |  |  |  |
| ZNF134   |  |  |  |
| ZNF136   |  |  |  |
| ZNF140   |  |  |  |
| ZNF142   |  |  |  |
| ZNF154   |  |  |  |
| ZNF160   |  |  |  |
| ZNF175   |  |  |  |
| ZNF184   |  |  |  |
| ZNF185   |  |  |  |
| ZNF197   |  |  |  |
| ZNF211   |  |  |  |
| ZNF212   |  |  |  |
| ZNF22    |  |  |  |
| ZNF221   |  |  |  |
| ZNF222   |  |  |  |
| ZNF227   |  |  |  |
| ZNF24    |  |  |  |

Table S6

|         |  |  |  |
|---------|--|--|--|
| ZNF248  |  |  |  |
| ZNF25   |  |  |  |
| ZNF26   |  |  |  |
| ZNF263  |  |  |  |
| ZNF266  |  |  |  |
| ZNF273  |  |  |  |
| ZNF276  |  |  |  |
| ZNF277  |  |  |  |
| ZNF282  |  |  |  |
| ZNF286A |  |  |  |
| ZNF3    |  |  |  |
| ZNF317  |  |  |  |
| ZNF330  |  |  |  |
| ZNF331  |  |  |  |
| ZNF333  |  |  |  |
| ZNF335  |  |  |  |
| ZNF343  |  |  |  |
| ZNF35   |  |  |  |
| ZNF354A |  |  |  |
| ZNF384  |  |  |  |
| ZNF385A |  |  |  |
| ZNF385D |  |  |  |
| ZNF394  |  |  |  |
| ZNF395  |  |  |  |
| ZNF407  |  |  |  |
| ZNF408  |  |  |  |
| ZNF431  |  |  |  |
| ZNF433  |  |  |  |
| ZNF440  |  |  |  |
| ZNF449  |  |  |  |
| ZNF45   |  |  |  |
| ZNF451  |  |  |  |
| ZNF461  |  |  |  |
| ZNF462  |  |  |  |
| ZNF468  |  |  |  |
| ZNF473  |  |  |  |
| ZNF480  |  |  |  |
| ZNF488  |  |  |  |
| ZNF496  |  |  |  |
| ZNF497  |  |  |  |
| ZNF502  |  |  |  |
| ZNF513  |  |  |  |
| ZNF514  |  |  |  |
| ZNF518A |  |  |  |
| ZNF558  |  |  |  |
| ZNF576  |  |  |  |
| ZNF577  |  |  |  |
| ZNF583  |  |  |  |
| ZNF585B |  |  |  |
| ZNF589  |  |  |  |
| ZNF592  |  |  |  |
| ZNF595  |  |  |  |
| ZNF597  |  |  |  |
| ZNF598  |  |  |  |
| ZNF599  |  |  |  |
| ZNF600  |  |  |  |
| ZNF610  |  |  |  |
| ZNF614  |  |  |  |
| ZNF621  |  |  |  |
| ZNF622  |  |  |  |

Table S6

|         |  |  |  |
|---------|--|--|--|
| ZNF629  |  |  |  |
| ZNF638  |  |  |  |
| ZNF655  |  |  |  |
| ZNF664  |  |  |  |
| ZNF672  |  |  |  |
| ZNF687  |  |  |  |
| ZNF688  |  |  |  |
| ZNF689  |  |  |  |
| ZNF692  |  |  |  |
| ZNF697  |  |  |  |
| ZNF700  |  |  |  |
| ZNF710  |  |  |  |
| ZNF720  |  |  |  |
| ZNF732  |  |  |  |
| ZNF740  |  |  |  |
| ZNF76   |  |  |  |
| ZNF761  |  |  |  |
| ZNF766  |  |  |  |
| ZNF768  |  |  |  |
| ZNF776  |  |  |  |
| ZNF778  |  |  |  |
| ZNF783  |  |  |  |
| ZNF785  |  |  |  |
| ZNF800  |  |  |  |
| ZNF81   |  |  |  |
| ZNF816  |  |  |  |
| ZNF823  |  |  |  |
| ZNF829  |  |  |  |
| ZNF83   |  |  |  |
| ZNF836  |  |  |  |
| ZNF84   |  |  |  |
| ZNF841  |  |  |  |
| ZNF862  |  |  |  |
| ZNF876P |  |  |  |
| ZNHIT1  |  |  |  |
| ZNHIT3  |  |  |  |
| ZNNT1   |  |  |  |
| ZNRD2   |  |  |  |
| ZNRF2   |  |  |  |
| ZP3     |  |  |  |
| ZPLD1   |  |  |  |
| ZPR1    |  |  |  |
| ZRANB1  |  |  |  |
| ZRANB3  |  |  |  |
| ZRSR2   |  |  |  |
| ZSCAN16 |  |  |  |
| ZSCAN18 |  |  |  |
| ZSCAN22 |  |  |  |
| ZSCAN29 |  |  |  |
| ZSCAN31 |  |  |  |
| ZSCAN9  |  |  |  |
| ZSWIM7  |  |  |  |
| ZSWIM8  |  |  |  |
| ZUP1    |  |  |  |
| ZW10    |  |  |  |
| ZWINT   |  |  |  |
| ZYG11A  |  |  |  |
| ZZEF1   |  |  |  |
